# Supplementary material
Source: PubMed Central journal article supplement (PMC2852188)

**Effective treatment of psoriasis with etanercept is linked to suppression of IL-17 signaling, not “immediate-response” TNF genes.**

Lisa C. Zaba, MD, PhD<sup>1</sup>, Mayte Suárez-Fariñas, PhD<sup>1</sup>, Judilyn Fuentes-Duculan, MD, Kristine Nogales, MD, Emma Guttman-Yassky, MD, MSc, Irma Cardinale, MS, Michelle A. Lowes, MB.BS, PhD<sup>2</sup>, James G. Krueger, MD, PhD<sup>2</sup>

<sup>1,2</sup> contributed equally to this work

**Corresponding author**

James G. Krueger

The Rockefeller University

Laboratory for Investigative Dermatology

1230 York Avenue, Box 178

New York, NY 10065

Ph: 212-327-7730

Fax: 212-327-8353

e-mail: [jgk@rockefeller.edu](mailto:jgk@rockefeller.edu)

**Communicating author**

Michelle A. Lowes

The Rockefeller University

Laboratory for Investigative Dermatology

1230 York Avenue, Box 178

New York, NY 10065

Ph: 212-327-7576

Fax: 212-327-8353

e-mail: [lowesm@rockefeller.edu](mailto:lowesm@rockefeller.edu)

Research was supported by a Clinical and Translational Science Award grant UL1RR024143, LZ is supported by NIH MSTP grant GM07739, and ML by K23 AR052404-01A1 and the Doris Duke Foundation. Amgen supported this study by an unrestricted research grant to Rockefeller University. JGK was a visiting lecturer at Amgen and received a small honorarium.

## Abbreviations

|     |                                    |
|-----|------------------------------------|
| SMM | Supplemental Materials and Methods |
| CC  | Consensus Clustering               |
| ES  | Enrichment Score                   |
| NES | Normalized Enrichment Score        |
| CDF | Cumulative Distribution Function   |

## **Supplemental Materials and Methods (SMM)**

The clinical trial was conducted according to the principles expressed in the *Declaration of Helsinki*. The clinical protocol was approved by the Rockefeller University Institutional Review Board, and informed consent was obtained from all patients.

### **Section 1. Immunohistochemistry and Immunofluorescence**

#### ***Section 1.1 Immunohistochemistry.***

Frozen skin sections were fixed with acetone and blocked in 10% normal goat serum (Vector Laboratories) for 30 min. Primary antibodies BDCA-1/CD1c (Miltenyi, clone AD5-8E7, 1:100) and Langerin (Immunotech, clone DCGM4, 1:100) were incubated overnight, biotin-labeled horse anti-mouse antibody (Vector Laboratories) was used to detect the primary antibody. The staining signal was amplified with avidin-biotin complex (Vector Laboratories) and developed using chromogen 3-amino-9-ethylcarbazole (Sigma-Aldrich). The number of positive cells per mm was counted manually using computer-assisted image analysis (NIH Image 6.1; <http://rsb.info.nih.gov/nih-image>). Some of the CD1c cell counts have been published before, but are analyzed differently here, and reported to confirm gene expression with protein staining <sup>1</sup>.

#### ***Section 1.2 Immunofluorescence.***

Primary antibody CD11c (BD Pharmingen, clone B-ly6, dil. 1:100) was incubated overnight at 4°C, followed by the second antibodies. HBEGF (R&D Systems, 406316, 1:10) was stained overnight at 4°C and amplified with goat anti-mouse IgG1 conjugated to Alexa 568; PLAUR (GeneTex, clone 2F11, 1:50) was also stained overnight at 4°C and amplified

with goat anti-mouse IgG1 conjugated to Alexa 568 (n=3 for each pair). Images were acquired using appropriate filters of a Zeiss Axioplan 2I microscope with Plan Apochromat 20 X 0.7 numerical aperture lens and a Hagamatsu orca ER-cooled charge-coupled device camera, controlled by METAVUE software (Universal Imaging). Dermal collagen fibers gave green autofluorescence, white line denotes dermo-epidermal junction.

## **Section 2. Statistical analysis**

Methods used for statistical analysis of microarray data are summarized in OR Table 1.

### ***Section 2.1 Quality control, preprocessing and filtering.***

GeneChip CEL files were scrutinized for spatial artifacts using Harshlight package (<http://asterion.rockefeller.edu/Harshlight/index2.html>)<sup>2</sup>. Classical microarray quality control report was obtained using *affyQCReport* package from Bioconductor. Intensity values (CEL files) were pre-processed to obtain expression values using GCRMA algorithm. Expression values were filtered to eliminate probe sets with low variation or intensity. Probe sets with standard deviation greater than 0.15, and expression values greater than 4 in at least 5 samples, were kept for further analysis. *Affymetrix* control probes were also eliminated. A total of 12,864 probe sets passed these filters.

### ***Section 2.2 Differential expression criteria.***

A mixed-effect linear model was used to model gene expression in order to account for the time-course design of the clinical trial. A model with Time, a between factor Group (Responders/ Non-Responders), interaction TimexGroup and Patient as random effect was considered.

Model fitting and hypothesis testing were conducted using the *limma* package from Bioconductor<sup>3</sup>. *Limma* uses an empirical bayes method to moderate the standard errors of the estimated comparisons. The empirical Bayes approach is equivalent to shrinkage of the estimated sample variances towards a pooled estimate, resulting in far more stable inference and improved power when the number of arrays is small. The moderated t-statistic is shown to follow a t-distribution with augmented degrees of freedom. The moderated t inferential approach extends to accommodate tests of composite null hypotheses through the use of moderated F-statistics.

From the proposed model, the time-profile for each gene (for Responders and Non-responders) can be derived and defined as “gene response-profile”. All hypotheses tested were derived from this model. For each hypothesis, the p-value of the corresponding statistic (moderated F or moderated t) was adjusted for multiple hypothesis testing, controlling the false discovery rate (FDR) using the Benjamini-Hochberg procedure. Additionally, to determine if individual comparisons were significant, FDR adjustments were made across time.

To determine disease related genes, a moderated t-test was used between non-lesional (NL) and lesional (LS) measures. To identify genes that varied across time for responders (defined as “etanercept-modulated genes”), a moderated F test was used to determine whether any of the expression values across time (weeks 1,2,4, and 12) differed from lesional baseline. To determine genes with different time profiles among responders vs. non-responders (Interaction Term TimexGroup), we used an E test to identify significant interaction terms.

### ***Section 2.3 Consensus clustering.***

To find distinct profiles among etanercept-modulated genes, as well as between responders and non-responders, we performed hierarchical average linkage clustering with

distance measure equal to 1-Pearson's correlation coefficient. The optimal number of discovered clusters (K) was assessed using Consensus Clustering (CC) algorithm available in GenePattern software <sup>4</sup>. In order to assess the stability of the discovered clusters, perturbations of the original data was simulated by resampling techniques. The clustering algorithm of choice was applied to each of the perturbed data sets, and the agreement (or consensus) among the multiple runs was assessed and summarized in a consensus matrix. The selection of an optimal cluster number was done using the consensus matrix and the area under the Cumulative Distribution Function (CDF) of the consensus matrix. The ideal partition had a clear consensus matrix, and further increase in the number of clusters did not lead to an increase in area under the CDF.

Given a set of items to be clustered (items can be either genes or chips/ experiments), Consensus Clustering (CC) represents the consensus across multiple runs of a clustering algorithm and assessment of the stability of the discovered K clusters. To this end, perturbations of the original data are simulated by resampling techniques. The clustering algorithm of choice is applied to each of the perturbed data sets, and the agreement, or *consensus*, among the multiple runs is assessed and summarized in a *consensus matrix*. Each matrix entry is indexed by an item pair, and it measures the proportion of times the pair's items are clustered together across the resampling iterations (ideally, always, or never). A distinct consensus matrix is generated for each of the number of clusters considered (e.g., if  $K_{max}=5$ , consensus matrices corresponding to  $K=2, 3, 4$ , and 5 clusters will be generated). Visual inspection of the consensus matrices, and of the corresponding summary statistics can be used to determine the best number of clusters.

The selection of the optimal number of clustering is done using the consensus matrix and

the statistics associated with the cumulative distribution function (CDF) of the consensus matrix. As K increases the area under the CDF markedly increase as long as K is less than or equal to K true. The ideal partition will have a clear consensus matrix and any further increase in the number of clusters do not lead to an increase of the area under the CDF. In this case we used Hierarchical clustering with the Pearson distance measured as  $1 - \text{corr}(x,y)$ .

#### ***Section 2.4 Cluster analysis of etanercept-modulated genes.***

The heatmap for the etanercept-modulated genes (2004 genes) clearly shows two large clusters. The existence of two major clusters was confirmed by CC using only 10 simulations. Because of the computational burden of the consensus clustering with such a large number of genes, we applied CC to both clusters separately to assess the stability of the clustering structure inside each of them using a larger number of simulations (1000).

The CC statistics for the Down set, had a peak at K=3 but the proportion of increase in Delta area was still high for K=4, and the latter presented a clear pattern of the Consensus Clustering Matrix. For the Up set, there were two peaks for 3 and 5 clusters, but the consensus matrix for K=3 showed a clear matrix pattern. We chose K=4 for Down list and K=3 for cluster analysis of Up List. OR Figure 2 demonstrates the consensus matrices and statistics for consensus clustering of down-modulated and up-modulated genes.

The relative velocity of gene down-modulation is visualized in each cluster graph by the dotted red line, marking the time taken to achieve 1/2 maximal gene expression ( $t_{1/2}$ ). “Immediate” genes achieved  $t_{1/2}$  between weeks 0 and 1 of etanercept treatment, “early”  $t_{1/2}$  fell between weeks 1 and 2, “mid” was between weeks 2 and 4, and “late” was between weeks 4 and 12.



### ***Section 2.5 Cluster clustering of genes with a different profile between responders and non-responders***

When applying CC to the set of genes that significantly change between responder vs. non-responder data, the area under the CDF function suggested that the number of clusters was 6 or 7. By inspection of the Consensus matrix, a 7 cluster structure clearly emerged, as shown in OR Figure 5.

### ***Section 2.6 GSEA analysis***

As illustrated in OR Figure 1, below outlines our approach to define the response profile of the cytokines pathways during etanercept treatment. The first step was to generate cytokine pathways, and secondly, the etanercept response profile for each gene using a mixed-effect model with Time (discrete) and a random effect for each patient.

We needed a method to evaluate the response profile of the cytokines pathways during etanercept treatment. One straightforward approach is to determine if each of the early, middle and late gene lists are enriched for any of the cytokines pathways by using overlap statistics such as the cumulative hypergeometric distribution. This approach has been broadly criticized in favor of approaches that capture coordinated changes in expression in functional sets like Gene Set Enrichment Analysis (GSEA). GSEA-like approaches in our experimental setting considered all of the gene profiles in the experiment, not only those that were significant, and assessed the significance of each pathway profile by a permutation approach that preserved gene-gene correlations, providing a more accurate null model.

GSEA method uses a general framework where any collection of gene sets (e.g., KEGG or Biocarta Pathways) can be mined for correlations with a specific phenotype, which is defined by the biological question being posed (i.e. Disease/Healthy in the two group scenario). For each gene set in a given collection, enrichment for a phenotype is assessed by:

1. Ranking the available probesets with respect to the phenotype (i.e. fold-change between two groups)
2. Determining the position of each member of the gene set in the ranked list
3. Using the Kolmogorov-Smirnov Statistic (KS) to measure the proximity of the gene set to the top of the list, called Enrichment Score (ES) (higher score indicates that genes in the gene set rank highly in the ranked phenotype list) – this can be normalized for the number of genes in the gene set (NES)
4. Calculating the p-value of the observed ES using the 1000 permutation test.

In the simple case of differences between paired samples (ie week 12-baseline), the phenotype is defined by the ranked list of fold changes. To address our specific and more complex design, this needed to be modified. The phenotype of interest in this experiment is how individual genes on a chip change over time with therapy, and return to baseline “non-lesional” levels. We generated a “slope” value for every gene in the microarray chip, as they change over time with etanercept treatment.

For every gene the time profile was modeled with a linear model with time as a dependent variable and random intercept for each patient. The coefficient of Time (or time slope) was used as a surrogate marker of response of each gene. Genes were ranked by the time slope, so that genes rapidly down-regulated with time are at the end of the list. To

determine if any gene set(s) had coordinate profiles greater than expected by chance alone, the enrichment score was calculated, and the associated p-value was estimated via simulation. A negative score indicates that genes in the pathway have higher proximity with the lower end of the list, where the slope is more negative, which indicates strong down-regulation with time.

As OR Table 6 shows, the four pathways being queried were enriched for genes that were down-regulated over time with etanercept treatment. All enrichment scores had highly significant p-values, and FDR <0.003. OR Table 6 shows that genes belonging to IL-17 and TNF pathways are most highly enriched for genes (i.e. have the highest ES) that were strongly down-regulated over time with etanercept treatment.

Another method confirming this finding is the Leading Edge subset for each pathway (OR Figure 7) (See <sup>5</sup> for more details). The leading edge subset (LES) of a gene set is the subset of members that contribute most to the ES. For a negative ES, it is the set of members that appear subsequent to the peak score. Genes that are in the LES for the IL-17 pathway are precisely those that intercept with TNF.

***Section 2.7. GSEA analysis of genes that were different in responders versus non-responders.***

The differences in profile between Responders and Non-responders can be quantified using GSEA but ranking each pathway by the difference in slope between responders and non-responders following the same logic that for the analysis using responders only

The methodology explained before can be easily extended to test if the profile of those pathways significantly differs between responder and non-responders. For every gene the time profile was modeled with a linear model with time and response as a dependent variable and random intercept for each patient. Genes were ranked by the difference between the time slope for responders and non-responders, so that genes rapidly down-regulated with time in responders and not so in not responders are at the end of the list. To determine if any gene set(s) had differences in Responders vs Non-Responders profiles greater than expected by chance alone, the enrichment score was calculated, and the associated p-value was estimated via simulation.

As OR Table 5 shows, the four pathways being queried were enriched for genes that were more strongly down-regulated in etanercept-Responders patients in comparison with non-responders. All enrichment scores had highly significant p-values, and null FDR. OR Table 5 shows that genes belonging to IL-17 and TNF pathways are most highly enriched for genes (i.e. have the highest ES) indicating that the differences in down-regulation after etanercept treatment between responders and non-responders are higher in TNF and IL17 genes than in the IL17 specific and TNF specific genes (OR Figure 8).

## References

1. Zaba LC, Fuentes-Duculan J, Eungdamrong NJ, Abello MV, Novitskaya I, Pierson KC, et al. Psoriasis is characterized by accumulation of immunostimulatory and Th1/Th17 cell-polarizing myeloid dendritic cells. *J Invest Dermatol* 2009; 129:79-88.
2. Suarez-Farinas M, Noggle S, Heke M, Hemmati-Brivanlou A, Magnasco MO. Comparing independent microarray studies: the case of human embryonic stem cells. *BMC Genomics* 2005; 6:99.
3. Zhang J, Carey V, Gentleman R. An extensible application for assembling annotation for genomic data. *Bioinformatics* 2003; 19:155-6.
4. Reich M, Liefeld T, Gould J, Lerner J, Tamayo P, Mesirov JP. GenePattern 2.0. *Nat Genet* 2006; 38:500-1.
5. Subramanian A, Tamayo P, Mootha VK, Mukherjee S, Ebert BL, Gillette MA, et al. Gene set enrichment analysis: a knowledge-based approach for interpreting genome-wide expression profiles. *Proc Natl Acad Sci U S A* 2005; 102:15545-50.

## Online Repository Figures and Tables

**OR Figure 1.** Schemata for overlay of *in vitro* keratinocyte pathway data with etanercept clinical trial data from biopsy specimens

**OR Figure 2.** Consensus matrices and statistics for consensus clustering for down- and up-regulated genes in responders.

**OR Figure 3. “Immediate” down-regulated genes in responders only (Cluster 1, Figure 1) contained many myeloid activation genes. (a)** Published myeloid cell (Novartis normal tissue compendium) genes are highly represented in the “immediate” cluster. **(b, c)** Two color immunofluorescence of myeloid DCs (CD11c) and two in cluster 1 genes, HBEGF and PLAUR. Both are expressed in CD11c<sup>+</sup> dermal cells (yellow cells in lesional skin) and decreased with treatment.

**OR Figure 4. “Early” down-regulated genes in responders only (Cluster 2, Figure 1) contained many myeloid activation genes.** Published myeloid cell genes (Novartis normal tissue compendium) are highly represented in the “immediate” cluster.

**OR Figure 5.** Consensus matrices and statistics for consensus clustering for genes differentially regulated in responders versus non-responders.

**OR Figure 6. Proposed model of TNF effects in psoriasis pathogenesis, and inhibition with etanercept in responders. (a)** TNF has both direct and down-stream or indirect effects in psoriasis pathogenesis. In responders, it is likely that both direct and indirect genes are modulated, as demonstrated by the “domino effect” of genomic resolution. **(b)** In non-responders, there must be TNF-independent pathways to drive Th17 pathway activation. For example, (1) other cytokines; (2) CD40L<sup>+</sup> T cells may activate dendritic cells (DCs); or (3) there may be Th17 activation by additional cytokines such as IL-6, TGFβ or IL-15.

**OR Figure 7.** GSEA enrichment plots for responders.

**OR Figure 8.** GSEA enrichment plots for responder versus non-responder data.

**OR Table 1. Statistical methods used for analysis.**

**OR Table 2. Genes down-modulated during etanercept treatment.** Fold change (FCH) > 2 for any time-point, FDR<0.05.

**OR Table 3. Genes up-regulated during etanercept treatment.** Fold change (FCH) > 2 for any time-point, FDR<0.05.

**OR Table 4. Genes showing differences between responders and non-responders during etanercept treatment.** Fold change (FCH) > 2 for any time-point, FDR<0.05.

**OR Table 5. GSEA table responders versus non-responders.**

**OR Table 6. GSEA table for responders.**

**Online Repository Table 1. Statistical methods used for analysis.**

| RESULT                                                                                                                                                                                               | METHOD                                                                                                                                                                                                                                                                                              | Section in SMM             |
|------------------------------------------------------------------------------------------------------------------------------------------------------------------------------------------------------|-----------------------------------------------------------------------------------------------------------------------------------------------------------------------------------------------------------------------------------------------------------------------------------------------------|----------------------------|
| Etanercept-modulated genes                                                                                                                                                                           | Mixed-effect linear model, moderated F statistic                                                                                                                                                                                                                                                    | SMM2.1<br>SMM2.2           |
| <ul style="list-style-type: none"> <li>• Genes down-and up-regulated by etanercept in responders</li> <li>• Genes differentially regulated by etanercept in responders and non-responders</li> </ul> | Hierarchical average linkage clustering with distance measure equal to 1-Pearsons's correlation coefficient. Optimal number of discovered clusters was assessed using Consensus Clustering algorithm available in GenePattern software                                                              | SMM2.3<br>SMM2.4<br>SMM2.5 |
| Time-response profile of cytokine keratinocyte "pathways"                                                                                                                                            | Define IL-17, TNF and IFN $\gamma$ keratinocyte "pathways", respectively <sup>a</sup> . A linear model was used to define the response profile of these pathways during etanercept treatment. GSEA <sup>b</sup> was used to query which pathways were down-regulated with etanercept in responders. | SMM2.6                     |
| Comparing time-response profile responders and non-responders                                                                                                                                        | GSEA analysis to compare response profiles of the keratinocyte pathways in responders and non-responders.                                                                                                                                                                                           | SMM2.7                     |

<sup>a</sup> Nograles K *et al.* Br J Dermatol 2008. 159(5)1092.

<sup>b</sup> Gene Set Enrichment Analysis



**GENES DOWN-MODULATED BY ETANERCEPT IN RESPONDERS**

|                |                                                                     |
|----------------|---------------------------------------------------------------------|
| <b>R_1vs0</b>  | Log2 Fold change between Wk1 vs Wk0 in Responders                   |
| <b>R_2vs0</b>  | Log2 Fold change between Wk2 vs Wk0 in Responders                   |
| <b>R_4vs0</b>  | Log2 Fold change between Wk4 vs Wk0 in Responders                   |
| <b>R_12vs0</b> | Log2 Fold change between Wk12 vs Wk0 in Responders                  |
| <b>R_NL</b>    | Mean expression value estimate (Log2) for Responders in NL skin     |
| <b>R_0</b>     | Mean expression value estimate (Log2) for Responders in LS skin     |
| <b>R_1</b>     | Mean expression value estimate (Log2) for Responders in LS at Wk 1  |
| <b>R_2</b>     | Mean expression value estimate (Log2) for Responders in LS at Wk 2  |
| <b>R_4</b>     | Mean expression value estimate (Log2) for Responders in LS at Wk 4  |
| <b>R_12</b>    | Mean expression value estimate (Log2) for Responders in LS at Wk 12 |
| <b>Cluster</b> | Final cluster membership                                            |

| Probe       | Symbol   | Description                                                                   | GenBank   | Gene   | U |
|-------------|----------|-------------------------------------------------------------------------------|-----------|--------|---|
| 210873_x_at | APOBEC3A | apolipoprotein B mRNA editing enzyme, catalytic polypeptide-like 3A           | U03891    | 200315 | H |
| 203968_s_at | CDC6     | cell division cycle 6 homolog ( <i>S. cerevisiae</i> )                        | NM_001254 | 990    | H |
| 205282_at   | LRP8     | low density lipoprotein receptor-related protein 8, apolipoprotein e receptor | NM_004631 | 7804   | H |
| 209237_s_at | SLC23A2  | solute carrier family 23 (nucleobase transporters), member 2                  | AF164142  | 9962   | H |
| 218990_s_at | SPRR3    | small proline-rich protein 3                                                  | NM_005416 | 6707   | H |
| 205393_s_at | CHEK1    | CHK1 checkpoint homolog ( <i>S. pombe</i> )                                   | NM_001274 | 1111   | H |
| 209891_at   | SPC25    | SPC25, NDC80 kinetochore complex component, homolog ( <i>S. cerevisiae</i> )  | AF225416  | 57405  | H |
| 39402_at    | IL1B     | interleukin 1, beta                                                           | M15330    | 3553   | H |

|             |         |                                                                               |           |       |   |
|-------------|---------|-------------------------------------------------------------------------------|-----------|-------|---|
|             |         |                                                                               |           |       |   |
| 204420_at   | FOSL1   | FOS-like antigen 1                                                            | BG251266  | 8061  | H |
| 205067_at   | IL1B    | interleukin 1, beta                                                           | NM_000576 | 3553  | H |
| 211924_s_at | PLAUR   | plasminogen activator, urokinase receptor                                     | AY029180  | 5329  | H |
| 220745_at   | IL19    | interleukin 19                                                                | NM_013371 | 29949 | H |
| 210845_s_at | PLAUR   | plasminogen activator, urokinase receptor                                     | U08839    | 5329  | H |
| 211572_s_at | SLC23A2 | solute carrier family 23 (nucleobase transporters), member 2                  | AF092511  | 9962  | H |
| 205119_s_at | FPR1    | formyl peptide receptor 1                                                     | NM_002029 | 2357  | H |
| 208433_s_at | LRP8    | low density lipoprotein receptor-related protein 8, apolipoprotein e receptor | NM_017522 | 7804  | H |
| 202768_     | FOSB    | FBJ murine osteosarcoma viral oncogene homolog B                              | NM_006    | 2354  | H |

|             |        |                                        |           |       |        |
|-------------|--------|----------------------------------------|-----------|-------|--------|
| at          |        |                                        | 732       |       |        |
| 38037_at    | HBEGF  | heparin-binding EGF-like growth factor | M60278    | 1839  | H      |
| 205114_s_at | CCL3   | chemokine (C-C motif) ligand 3         | NM_002983 | 6348  | H      |
| 220655_at   | TNIP3  | TNFAIP3 interacting protein 3          | NM_024873 | 79931 | H      |
| 219181_at   | LIPG   | lipase, endothelial                    | NM_006033 | 9388  | H      |
| 204103_at   | CCL4   | chemokine (C-C motif) ligand 4         | NM_002984 | 6351  | H      |
| 204750_s_at | DSC2   | desmocollin 2                          | BF196457  | 1824  | H      |
| 205681_at   | BCL2A1 | BCL2-related protein A1                | NM_004049 | 597   | H      |
| 211506_s_at | IL8    | interleukin 8                          | AF043337  | 3576  | H<br>H |
| 208079_s_at | AURKA  | aurora kinase A                        | NM_003158 | 6790  | H      |
| 218662_s_at | NCAPG  | non-SMC condensin I complex, subunit G | NM_022346 | 64151 | H      |
| 202859_x_at | IL8    | interleukin 8                          | NM_000584 | 3576  | H<br>H |

|             |         |                                                                         |           |       |   |
|-------------|---------|-------------------------------------------------------------------------|-----------|-------|---|
|             |         |                                                                         |           |       |   |
| 204092_s_at | AURKA   | aurora kinase A                                                         | NM_003600 | 6790  | H |
| 201538_s_at | DUSP3   | dual specificity phosphatase 3 (vaccinia virus phosphatase VH1-related) | AL048503  | 1845  | H |
| 217173_s_at | LDLR    | low density lipoprotein receptor (familial hypercholesterolemia)        | S70123    | 3949  | H |
| 209464_at   | AURKB   | aurora kinase B                                                         | AB011446  | 9212  | H |
| 218663_at   | NCAPG   | non-SMC condensin I complex, subunit G                                  | NM_022346 | 64151 | H |
| 201348_at   | GPX3    | glutathione peroxidase 3 (plasma)                                       | NM_002084 | 2878  | H |
| 218355_at   | KIF4A   | kinesin family member 4A                                                | AF179308  | 24137 | H |
| 209774_x_at | CXCL2   | chemokine (C-X-C motif) ligand 2                                        | M57731    | 2920  | H |
| 221009_s_at | ANGPTL4 | angiopoietin-like 4                                                     | NM_016109 | 51129 | H |
| 204033_at   | TRIP13  | thyroid hormone receptor interactor 13                                  | NM_004237 | 9319  | H |
| 207828_s_at | CENPF   | centromere protein F, 350/400ka (mitosin)                               | NM_005196 | 1063  | H |
| 205190_at   | PLS1    | plastin 1 (I isoform)                                                   | NM_002670 | 5357  | H |

|             |         |                                                                                |           |       |   |
|-------------|---------|--------------------------------------------------------------------------------|-----------|-------|---|
| 219580_s_at | TMC5    | transmembrane channel-like 5                                                   | NM_024780 | 79838 | H |
| 204470_at   | CXCL1   | chemokine (C-X-C motif) ligand 1 (melanoma growth stimulating activity, alpha) | NM_001511 | 2919  | H |
| 201884_at   | CEACAM5 | carcinoembryonic antigen-related cell adhesion molecule 5                      | NM_004363 | 1048  | H |
| 203649_s_at | PLA2G2A | phospholipase A2, group IIA (platelets, synovial fluid)                        | NM_000300 | 5320  | H |
| 207165_at   | HMMR    | hyaluronan-mediated motility receptor (RHAMM)                                  | NM_012485 | 3161  | H |
| 205242_at   | CXCL13  | chemokine (C-X-C motif) ligand 13 (B-cell chemoattractant)                     | NM_006419 | 10563 | H |
| 209546_s_at | APOL1   | apolipoprotein L, 1                                                            | AF323540  | 8542  | H |
| 218755_at   | KIF20A  | kinesin family member 20A                                                      | NM_005733 | 10112 | H |
| 204034_at   | ETHE1   | ethylmalonic encephalopathy 1                                                  | NM_014297 | 23474 | H |
| 205633_s_at | ALAS1   | aminolevulinate, delta-, synthase 1                                            | NM_000688 | 211   | H |

|             |        |                                                                                                |           |        |   |
|-------------|--------|------------------------------------------------------------------------------------------------|-----------|--------|---|
| 203418_at   | CCNA2  | cyclin A2                                                                                      | NM_001237 | 890    | H |
| 204408_at   | APEX2  | APEX nuclease (apurinic/aprimidinic endonuclease) 2                                            | NM_014481 | 27301  | H |
| 219918_s_at | ASPM   | asp (abnormal spindle) homolog, microcephaly associated (Drosophila)                           | NM_018123 | 259266 | H |
| 221521_s_at | GIN52  | GIN5 complex subunit 2 (Psf2 homolog)                                                          | BC003186  | 51659  | H |
| 205349_at   | GNA15  | guanine nucleotide binding protein (G protein), alpha 15 (Gq class)                            | NM_002068 | 2769   | H |
| 205774_at   | F12    | coagulation factor XII (Hageman factor)                                                        | NM_000505 | 2161   | H |
| 201714_at   | TUBG1  | tubulin, gamma 1                                                                               | NM_001070 | 7283   | H |
| 205476_at   | CCL20  | chemokine (C-C motif) ligand 20                                                                | NM_004591 | 6364   | H |
| 202338_at   | TK1    | thymidine kinase 1, soluble                                                                    | NM_003258 | 7083   | H |
| 219956_at   | GALNT6 | UDP-N-acetyl-alpha-D-galactosamine:polypeptide N-acetylgalactosaminyltransferase 6 (GalNAc-T6) | NM_007210 | 11226  | H |
| 209372_x_at | TUBB2A | tubulin, beta 2A                                                                               | BF971587  | 7280   | H |
| 213793_s_at | HOMER1 | homer homolog 1 (Drosophila)                                                                   | BE550452  | 9456   | H |
| 207455_at   | P2RY1  | purinergic receptor P2Y, G-protein coupled, 1                                                  | NM_002563 | 5028   | H |
| 209260_at   | SFN    | stratifin                                                                                      | BC000329  | 2810   | H |

|             |          |                                                           |           |        |   |
|-------------|----------|-----------------------------------------------------------|-----------|--------|---|
| 201291_s_at | TOP2A    | topoisomerase (DNA) II alpha 170kDa                       | AU159942  | 7153   | H |
| 205436_s_at | H2AFX    | H2A histone family, member X                              | NM_002105 | 3014   | H |
| 203747_at   | AQP3     | aquaporin 3 (Gill blood group)                            | NM_004925 | 360    | H |
| 204768_s_at | FEN1     | flap structure-specific endonuclease 1                    | NM_004111 | 2237   | H |
| 203974_at   | HDHD1A   | haloacid dehalogenase-like hydrolase domain containing 1A | NM_012080 | 8226   | H |
| 1431_at     | CYP2E1   | cytochrome P450, family 2, subfamily E, polypeptide 1     | J02843    | 1571   | H |
| 201201_at   | CSTB     | cystatin B (stefin B)                                     | NM_000100 | 1476   | H |
| 213421_x_at | PRSS3    | protease, serine, 3 (mesotrypsin)                         | AW007273  | 5646   | H |
| 215395_x_at | TRY6     | trypsinogen C                                             | U66061    | 154754 | H |
| 204715_at   | PANX1    | pannexin 1                                                | NM_015368 | 24145  | H |
| 208002_s_at | ACOT7    | acyl-CoA thioesterase 7                                   | NM_007274 | 11332  | H |
| 216470_x_at | TRY6     | trypsinogen C                                             | AF009664  | 154754 | H |
| 219555_s_at | CENPN    | centromere protein N                                      | NM_018455 | 55839  | H |
| 203573_s_at | RABGGT A | Rab geranylgeranyltransferase, alpha subunit              | NM_004581 | 5875   | H |

|             |          |                                                                                  |           |        |   |
|-------------|----------|----------------------------------------------------------------------------------|-----------|--------|---|
| 218392_x_at | SFXN1    | sideroflexin 1                                                                   | NM_022754 | 94081  | H |
| 208937_s_at | ID1      | inhibitor of DNA binding 1, dominant negative helix-loop-helix protein           | D13889    | 3397   | H |
| 213680_at   | KRT6C    | keratin 6C                                                                       | AI831452  | 286887 | H |
| 202833_s_at | SERPINA1 | serpin peptidase inhibitor, clade A (alpha-1 antitrypsin, antitrypsin), member 1 | NM_000295 | 5265   | H |
| 203021_at   | SLPI     | secretory leukocyte peptidase inhibitor                                          | NM_003064 | 6590   | H |
| 214710_s_at | CCNB1    | cyclin B1                                                                        | BE407516  | 891    | H |
| 202705_at   | CCNB2    | cyclin B2                                                                        | NM_004701 | 9133   | H |
| 202712_s_at | CKMT1B   | creatine kinase, mitochondrial 1B                                                | NM_020990 | 1159   | H |
| 205847_at   | PRSS22   | protease, serine, 22                                                             | NM_022119 | 64063  | H |
| 213523_at   | CCNE1    | cyclin E1                                                                        | AI671049  | 898    | H |
| 215808_at   | KLK10    | kallikrein-related peptidase 10                                                  | AK026045  | 5655   | H |
| 202671_s_at | PDXK     | pyridoxal (pyridoxine, vitamin B6) kinase                                        | NM_003681 | 8566   | H |
| 214205_x_at | GLRX3    | glutaredoxin 3                                                                   | AK022131  | 10539  | H |
| 207463_x_at | PRSS3    | protease, serine, 3 (mesotrypsin)                                                | NM_002771 | 5646   | H |
| 205829_at   | HSD17B1  | hydroxysteroid (17-beta) dehydrogenase 1                                         | NM_000413 | 3292   | H |
| 208813_at   | GOT1     | glutamic-oxaloacetic transaminase 1, soluble (aspartate aminotransferase 1)      | BC000498  | 2805   | H |



|             |         |                                                                  |           |       |   |
|-------------|---------|------------------------------------------------------------------|-----------|-------|---|
|             |         |                                                                  |           |       |   |
| 210048_at   | NAPG    | N-ethylmaleimide-sensitive factor attachment protein, gamma      | BC001889  | 8774  | H |
| 212656_at   | TSMF    | Ts translation elongation factor, mitochondrial                  | AF110399  | 10102 | H |
| 203554_x_at | PTTG1   | pituitary tumor-transforming 1                                   | NM_004219 | 9232  | H |
| 218960_at   | TMPRSS4 | transmembrane protease, serine 4                                 | NM_016425 | 56649 | H |
| 205595_at   | DSG3    | desmoglein 3 (pemphigus vulgaris antigen)                        | NM_001944 | 1830  | H |
| 210119_at   | KCNJ15  | potassium inwardly-rectifying channel, subfamily J, member 15    | U73191    | 3772  | H |
| 209408_at   | KIF2C   | kinesin family member 2C                                         | U63743    | 11004 | H |
| 216244_at   | IL1RN   | interleukin 1 receptor antagonist                                | BE563442  | 3557  | H |
| 202067_s_at | LDLR    | low density lipoprotein receptor (familial hypercholesterolemia) | AI861942  | 3949  | H |

|             |           |                                                   |           |        |   |
|-------------|-----------|---------------------------------------------------|-----------|--------|---|
| 203821_at   | HBEGF     | heparin-binding EGF-like growth factor            | NM_001945 | 1839   | H |
| 218585_s_at | DTL       | denticleless homolog (Drosophila)                 | AK001261  | 51514  | H |
| 203023_at   | HSPC111   | hypothetical protein HSPC111                      | NM_016391 | 51491  | H |
| 204908_s_at | BCL3      | B-cell CLL/lymphoma 3                             | NM_005178 | 602    | H |
| 222039_at   | LOC146909 | hypothetical protein LOC146909                    | AA292789  | 146909 | H |
| 201531_at   | ZFP36     | zinc finger protein 36, C3H type, homolog (mouse) | NM_003407 | 7538   | H |
| 202095_s_at | BIRC5     | baculoviral IAP repeat-containing 5 (survivin)    | NM_001168 | 332    | H |
| 203233_at   | IL4R      | interleukin 4 receptor                            | NM_000418 | 3566   | H |

|             |          |                                                                                |           |       |   |
|-------------|----------|--------------------------------------------------------------------------------|-----------|-------|---|
| 211806_s_at | KCNJ15   | potassium inwardly-rectifying channel, subfamily J, member 15                  | D87291    | 3772  | H |
| 221539_at   | EIF4EBP1 | eukaryotic translation initiation factor 4E binding protein 1                  | AB044548  | 1978  | H |
| 212236_x_at | KRT17    | keratin 17                                                                     | Z19574    | 3872  | H |
| 220780_at   | PLA2G3   | phospholipase A2, group III                                                    | NM_015715 | 50487 | H |
| 205239_at   | AREG     | amphiregulin (schwannoma-derived growth factor)                                | NM_001657 | 374   | H |
| 200815_s_at | PFAH1B1  | platelet-activating factor acetylhydrolase, isoform Ib, alpha subunit 45kDa    | L13386    | 5048  | H |
| 212290_at   | SLC7A1   | solute carrier family 7 (cationic amino acid transporter, y+ system), member 1 | AA527433  | 6541  | H |
| 214091_s_at | GPX3     | glutathione peroxidase 3 (plasma)                                              | AW149846  | 2878  | H |
| 219911_s_at | SLCO4A1  | solute carrier organic anion transporter family, member 4A1                    | NM_016354 | 28231 | H |

|             |          |                                                                                     |           |        |   |
|-------------|----------|-------------------------------------------------------------------------------------|-----------|--------|---|
| 209976_s_at | CYP2E1   | cytochrome P450, family 2, subfamily E, polypeptide 1                               | AF182276  | 1571   | H |
| 211429_s_at | SERPINA1 | serpin peptidase inhibitor, clade A (alpha-1 antiproteinase, antitrypsin), member 1 | AF119873  | 5265   | H |
| 36564_at    | RNF19B   | ring finger protein 19B                                                             | W27419    | 127544 | H |
| 203234_at   | UPP1     | uridine phosphorylase 1                                                             | NM_003364 | 7378   | H |
| 205015_s_at | TGFA     | transforming growth factor, alpha                                                   | NM_003236 | 7039   | H |
| 219270_at   | CHAC1    | ChaC, cation transport regulator homolog 1 (E. coli)                                | NM_024111 | 79094  | H |
| 221245_s_at | FZD5     | frizzled homolog 5 (Drosophila)                                                     | NM_030804 | 7855   | H |
| 202954_at   | UBE2C    | ubiquitin-conjugating enzyme E2C                                                    | NM_007019 | 11065  | H |
| 204162_at   | NDC80    | NDC80 homolog, kinetochore complex component (S. cerevisiae)                        | NM_006101 | 10403  | H |
| 201860_s_at | PLAT     | plasminogen activator, tissue                                                       | NM_000930 | 5327   | H |
| 203180_at   | ALDH1A3  | aldehyde dehydrogenase 1 family, member A3                                          | NM_000693 | 220    | H |

|             |          |                                                              |           |       |   |
|-------------|----------|--------------------------------------------------------------|-----------|-------|---|
|             |          |                                                              |           |       |   |
| 209236_at   | SLC23A2  | solute carrier family 23 (nucleobase transporters), member 2 | AL389886  | 9962  | H |
| 216952_s_at | LMNB2    | lamin B2                                                     | M94363    | 84823 | H |
| 218035_s_at | FLJ20273 | RNA-binding protein                                          | NM_019027 | 54502 | H |
| 204962_s_at | CENPA    | centromere protein A                                         | NM_001809 | 1058  | H |
| 206364_at   | KIF14    | kinesin family member 14                                     | NM_014875 | 9928  | H |

|             |           |                                                                          |           |       |   |
|-------------|-----------|--------------------------------------------------------------------------|-----------|-------|---|
| 205157_s_at | KRT17     | keratin 17                                                               | NM_000422 | 3872  | H |
| 212022_s_at | MKI67     | antigen identified by monoclonal antibody Ki-67                          | AU132185  | 4288  | H |
| 204767_s_at | FEN1      | flap structure-specific endonuclease 1                                   | BC000323  | 2237  | H |
| 210827_s_at | ELF3      | E74-like factor 3 (ets domain transcription factor, epithelial-specific) | U73844    | 1999  | H |
| 203764_at   | DLG7      | discs, large homolog 7 (Drosophila)                                      | NM_014750 | 9787  | H |
| 204493_at   | BID       | BH3 interacting domain death agonist                                     | NM_001196 | 637   | H |
| 222037_at   | MCM4      | minichromosome maintenance complex component 4                           | AI859865  | 4173  | H |
| 200935_at   | CALR      | calreticulin                                                             | NM_004343 | 811   | H |
| 202870_s_at | CDC20     | cell division cycle 20 homolog (S. cerevisiae)                           | NM_001255 | 991   | H |
| 212657_s_at | IL1RN     | interleukin 1 receptor antagonist                                        | AW083357  | 3557  | H |
| 213572_s_at | SERPIN B1 | serpin peptidase inhibitor, clade B (ovalbumin), member 1                | AI554300  | 1992  | H |
| 218498_s_at | ERO1L     | ERO1-like (S. cerevisiae)                                                | NM_014584 | 30001 | H |
| 202779_s_at | UBE2S     | ubiquitin-conjugating enzyme E2S                                         | NM_014501 | 27338 | H |
| 203256_at   | CDH3      | cadherin 3, type 1, P-cadherin (placental)                               | NM_001793 | 1001  | H |

|             |           |                                                                             |           |        |   |
|-------------|-----------|-----------------------------------------------------------------------------|-----------|--------|---|
| 204641_at   | NEK2      | NIMA (never in mitosis gene a)-related kinase 2                             | NM_002497 | 4751   | H |
| 205014_at   | FGFBP1    | fibroblast growth factor binding protein 1                                  | NM_005130 | 9982   | H |
| 209803_s_at | PHLDA2    | pleckstrin homology-like domain, family A, member 2                         | AF001294  | 7262   | H |
| 216532_x_at |           |                                                                             | AL138831  | 643450 |   |
| 205402_x_at | PRSS2     | protease, serine, 2 (trypsin 2)                                             | NM_002770 | 5645   | H |
| 209100_at   | IFRD2     | interferon-related developmental regulator 2                                | BC001327  | 7866   | H |
| 214011_s_at | HSPC111   | hypothetical protein HSPC111                                                | BE314601  | 51491  | H |
| 201693_s_at | EGR1      | early growth response 1                                                     | NM_001964 | 1958   | H |
| 217185_s_at | LOC442240 | similar to zinc finger protein 259                                          | Z95118    | 442240 | H |
| 203499_at   | EPHA2     | EPH receptor A2                                                             | NM_004431 | 1969   | H |
| 204351_at   | S100P     | S100 calcium binding protein P                                              | NM_005980 | 6286   | H |
| 39249_at    | AQP3      | aquaporin 3 (Gill blood group)                                              | AB001325  | 360    | H |
| 213984_at   | PDS5A     | PDS5, regulator of cohesion maintenance, homolog A ( <i>S. cerevisiae</i> ) | AW991219  | 23244  | H |
| 215760_s_at | SBNO2     | strawberry notch homolog 2 ( <i>Drosophila</i> )                            | AC005390  | 22904  | H |
| 212268_at   | SERPIN B1 | serpin peptidase inhibitor, clade B (ovalbumin), member 1                   | NM_030666 | 1992   | H |
| 213007_at   | FANCI     | Fanconi anemia, complementation group I                                     | W74442    | 55215  | H |
| 216905_s_at | ST14      | suppression of tumorigenicity 14 (colon carcinoma)                          | U20428    | 6768   | H |

|             |          |                                                                  |           |       |   |
|-------------|----------|------------------------------------------------------------------|-----------|-------|---|
| 218796_at   | C20orf42 | chromosome 20 open reading frame 42                              | NM_017671 | 55612 | H |
| 212021_s_at | MKI67    | antigen identified by monoclonal antibody Ki-67                  | AU132185  | 4288  | H |
| 212659_s_at | IL1RN    | interleukin 1 receptor antagonist                                | AW083357  | 3557  | H |
| 60474_at    | C20orf42 | chromosome 20 open reading frame 42                              | AA469071  | 55612 | H |
| 205394_at   | CHEK1    | CHK1 checkpoint homolog (S. pombe)                               | NM_001274 | 1111  | H |
| 205534_at   | PCDH7    | protocadherin 7                                                  | NM_002589 | 5099  | H |
| 220187_at   | STEAP4   | STEAP family member 4                                            | NM_024636 | 79689 | H |
| 220865_s_at | PDSS1    | prenyl (decaprenyl) diphosphate synthase, subunit 1              | NM_014317 | 23590 | H |
| 219148_at   | PBK      | PDZ binding kinase                                               | NM_018492 | 55872 | H |
| 219588_s_at | NCAPG2   | non-SMC condensin II complex, subunit G2                         | NM_017760 | 54892 | H |
| 206157_at   | PTX3     | pentraxin-related gene, rapidly induced by IL-1 beta             | NM_002852 | 5806  | H |
| 209373_at   | MALL     | mal, T-cell differentiation protein-like                         | BC003179  | 7851  | H |
| 200733_s_at | PTP4A1   | protein tyrosine phosphatase type IVA, member 1                  | BF576710  | 7803  | H |
| 202068_s_at | LDLR     | low density lipoprotein receptor (familial hypercholesterolemia) | NM_000527 | 3949  | H |
| 205759_s_at | SULT2B1  | sulfotransferase family, cytosolic, 2B, member 1                 | NM_004605 | 6820  | H |
| 212769_at   | TLE3     | transducin-like enhancer of split 3 (E(sp1) homolog, Drosophila) | AI56742   | 7090  | H |



|             |         |                                                              |           |        |   |
|-------------|---------|--------------------------------------------------------------|-----------|--------|---|
| at          |         |                                                              | 6         |        |   |
| 209825_s_at | UCK2    | uridine-cytidine kinase 2                                    | BC002906  | 7371   | H |
| 219347_at   | NUDT15  | nudix (nucleoside diphosphate linked moiety X)-type motif 15 | NM_018283 | 55270  | H |
| 207622_s_at | ABCF2   | ATP-binding cassette, sub-family F (GCN20), member 2         | NM_005692 | 10061  | H |
| 209247_s_at | ABCF2   | ATP-binding cassette, sub-family F (GCN20), member 2         | BC001661  | 10061  | H |
| 202613_at   | CTPS    | CTP synthase                                                 | NM_001905 | 1503   | H |
| 204881_s_at | UGCG    | UDP-glucose ceramide glucosyltransferase                     | NM_003358 | 7357   | H |
| 201473_at   | JUNB    | jun B proto-oncogene                                         | NM_002229 | 3726   | H |
| 202107_s_at | MCM2    | minichromosome maintenance complex component 2               | NM_004526 | 4171   | H |
| 211015_s_at | HSPA4   | heat shock 70kDa protein 4                                   | L12723    | 3308   | H |
| 214226_at   | POL3S   | polymerase 3                                                 | AA528252  | 339105 | H |
| 201695_s_at | NP      | nucleoside phosphorylase                                     | NM_000270 | 4860   | H |
| 204826_at   | CCNF    | cyclin F                                                     | NM_001761 | 899    | H |
| 209344_at   | TPM4    | tropomyosin 4                                                | BC002827  | 7171   | H |
| 219998_at   | HSPC159 | galectin-related protein                                     | NM_014181 | 29094  | H |

|             |          |                                                                                   |           |        |   |
|-------------|----------|-----------------------------------------------------------------------------------|-----------|--------|---|
| 218516_s_at | IMPAD1   | inositol monophosphatase domain containing 1                                      | NM_017813 | 54928  | H |
| 220238_s_at | KLHL7    | kelch-like 7 (Drosophila)                                                         | NM_018846 | 55975  | H |
| 208965_s_at | PYHIN1   | pyrin and HIN domain family, member 1                                             | BG256677  | 149628 | H |
| 218900_at   | CNNM4    | cyclin M4                                                                         | NM_020184 | 26504  | H |
| 218986_s_at | FLJ20035 | hypothetical protein FLJ20035                                                     | NM_017631 | 55601  | H |
| 207655_s_at | BLNK     | B-cell linker                                                                     | NM_013314 | 29760  | H |
| 208191_x_at | PSG4     | pregnancy specific beta-1-glycoprotein 4                                          | NM_002780 | 5672   | H |
| 217188_s_at | C14orf1  | chromosome 14 open reading frame 1                                                | AC007182  | 11161  | H |
| 218622_at   | NUP37    | nucleoporin 37kDa                                                                 | NM_024057 | 79023  | H |
| 202266_at   | TTRAP    | TRAF and TNF receptor associated protein                                          | NM_016614 | 51567  | H |
| 211367_s_at | CASP1    | caspase 1, apoptosis-related cysteine peptidase (interleukin 1, beta, convertase) | U13699    | 834    | H |
| 210732_s_at | LGALS8   | lectin, galactoside-binding, soluble, 8 (galectin 8)                              | AL136105  | 3964   | H |
| 214453_s_at | IFI44    | interferon-induced protein 44                                                     | NM_006417 | 10561  | H |
| 200887_s_at | STAT1    | signal transducer and activator of transcription 1, 91kDa                         | NM_007315 | 6772   | H |
| 202170_s_at | AASDHPPT | aminoadipate-semialdehyde dehydrogenase-phosphopantetheinyl transferase           | AF151057  | 60496  | H |

|             |         |                                                                                   |           |       |   |
|-------------|---------|-----------------------------------------------------------------------------------|-----------|-------|---|
| 219695_at   | SMPD3   | sphingomyelin phosphodiesterase 3, neutral membrane (neutral sphingomyelinase II) | NM_024703 | 55512 | H |
| 222262_s_at | ETNK1   | ethanolamine kinase 1                                                             | AL137750  | 55500 | H |
| 211366_x_at | CASP1   | caspase 1, apoptosis-related cysteine peptidase (interleukin 1, beta, convertase) | U13698    | 834   | H |
| 211368_s_at | CASP1   | caspase 1, apoptosis-related cysteine peptidase (interleukin 1, beta, convertase) | U13700    | 834   | H |
| 203560_at   | GGH     | gamma-glutamyl hydrolase (conjugase, folylpolyglammaglutamyl hydrolase)           | NM_003878 | 8836  | H |
| 203767_s_at | STS     | steroid sulfatase (microsomal), isozyme S                                         | AI122754  | 412   | H |
| 202578_s_at | DDX19A  | DEAD (Asp-Glu-Ala-As) box polypeptide 19A                                         | NM_018332 | 55308 | H |
| 202687_s_at | TNFSF10 | tumor necrosis factor (ligand) superfamily, member 10                             | NM_003810 | 8743  | H |
| 219369_s_at | OTUB2   | OTU domain, ubiquitin aldehyde binding 2                                          | NM_023112 | 78990 | H |
| 221107_at   | CHRNA9  | cholinergic receptor, nicotinic, alpha 9                                          | NM_017581 | 55584 | H |
| 214490_at   | ARSF    | arylsulfatase F                                                                   | NM_004042 | 416   | H |
| 218582_     | 5-Mar   | membrane-associated ring finger (C3HC4) 5                                         | NM_017    | 5470  | H |

|             |        |                                             |           |       |   |
|-------------|--------|---------------------------------------------|-----------|-------|---|
| at          |        |                                             | 824       | 8     |   |
| 213933_at   | PTGER3 | prostaglandin E receptor 3 (subtype EP3)    | AW242315  | 5733  | H |
| 214279_s_at | NDRG2  | NDRG family member 2                        | W74452    | 57447 | H |
| 211561_x_at | MAPK14 | mitogen-activated protein kinase 14         | L35253    | 1432  | H |
| 211834_s_at | TP63   | tumor protein p63                           | AB042841  | 8626  | H |
| 206643_at   | HAL    | histidine ammonia-lyase                     | NM_002108 | 3034  | H |
| 210830_s_at | PON2   | paraoxonase 2                               | AF001602  | 5445  | H |
| 205832_at   | CPA4   | carboxypeptidase A4                         | NM_016352 | 51200 | H |
| 206133_at   | XAF1   | XIAP associated factor-1                    | NM_017523 | 54739 | H |
| 204439_at   | IFI44L | interferon-induced protein 44-like          | NM_006820 | 10964 | H |
| 204702_s_at | NFE2L3 | nuclear factor (erythroid-derived 2)-like 3 | NM_004289 | 9603  | H |

|             |         |                                                                 |           |       |   |
|-------------|---------|-----------------------------------------------------------------|-----------|-------|---|
| 216125_s_at | RANBP9  | RAN binding protein 9                                           | AF064606  | 10048 | H |
| 221698_s_at | CLECT7A | C-type lectin domain family 7, member A                         | AF313468  | 64581 | H |
| 200798_x_at | MCL1    | myeloid cell leukemia sequence 1 (BCL2-related)                 | NM_021960 | 4170  | H |
| 212365_at   | MYO1B   | myosin IB                                                       | BF215996  | 4430  | H |
| 205240_at   | GPSM2   | G-protein signaling modulator 2 (AGS3-like, C. elegans)         | NM_013296 | 29899 | H |
| 210018_x_at | MALT1   | mucosa associated lymphoid tissue lymphoma translocation gene 1 | AB026118  | 10892 | H |
| 214895_s_at | ADAM10  | ADAM metalloproteinase domain 10                                | AU135154  | 102   | H |
| 201435_s_at | EIF4E   | eukaryotic translation initiation factor 4E                     | AW268640  | 1977  | H |
| 217960_s_at | TOMM22  | translocase of outer mitochondrial membrane 22 homolog (yeast)  | NM_020243 | 56993 | H |
| 221765_at   | UGCG    | UDP-glucose ceramide glucosyltransferase                        | AI378044  | 7357  | H |
| 213501_at   | ACOX1   | acyl-Coenzyme A oxidase 1, palmitoyl                            | T62985    | 51    | H |
| 206075_s_at | CSNK2A1 | casein kinase 2, alpha 1 polypeptide                            | NM_001895 | 1457  | H |
| 206113_s_at | RAB5A   | RAB5A, member RAS oncogene family                               | NM_004162 | 5868  | H |

|             |           |                                                                  |           |        |   |
|-------------|-----------|------------------------------------------------------------------|-----------|--------|---|
| 209457_at   | DUSP5     | dual specificity phosphatase 5                                   | U16996    | 1847   | H |
| 217811_at   | SELT      | selenoprotein T                                                  | NM_016275 | 51714  | H |
| 200900_s_at | M6PR      | mannose-6-phosphate receptor (cation dependent)                  | AI583537  | 4074   | H |
| 206788_s_at | CBFB      | core-binding factor, beta subunit                                | AF294326  | 865    | H |
| 203276_at   | LMNB1     | lamin B1                                                         | NM_005573 | 4001   | H |
| 201514_s_at | G3BP1     | GTPase activating protein (SH3 domain) binding protein 1         | NM_005754 | 10146  | H |
| 215207_x_at | LOC729148 | similar to lethal (2) k00619 CG4775-PA                           | BF695847  | 729148 | H |
| 219272_at   | TRIM62    | tripartite motif-containing 62                                   | NM_018207 | 55223  | H |
| 206472_s_at | TLE3      | transducin-like enhancer of split 3 (E(sp1) homolog, Drosophila) | NM_005078 | 7090   | H |
| 206604_at   | OVOL1     | ovo-like 1(Drosophila)                                           | NM_004561 | 5017   | H |
| 219554_at   | RHCG      | Rh family, C glycoprotein                                        | NM_016321 | 51458  | H |
| 221779_at   | MICALL1   | MICAL-like 1                                                     | AB051455  | 85377  | H |
| 203127_s_at | SPTLC2    | serine palmitoyltransferase, long chain base subunit 2           | BC005123  | 9517   | H |
| 204858_s_at | ECGF1     | endothelial cell growth factor 1 (platelet-derived)              | NM_001953 | 1890   | H |
| 210020_x_at | CALML3    | calmodulin-like 3                                                | M58026    | 810    | H |

|             |          |                                                                     |           |       |   |
|-------------|----------|---------------------------------------------------------------------|-----------|-------|---|
|             |          |                                                                     |           |       |   |
| 211136_s_at | CLPTM1   | cleft lip and palate associated transmembrane protein 1             | BC004865  | 1209  | H |
| 206686_at   | PDK1     | pyruvate dehydrogenase kinase, isozyme 1                            | NM_002610 | 5163  | H |
| 222309_at   | C6orf62  | chromosome 6 open reading frame 62                                  | AW972292  | 81688 | H |
| 211919_s_at | CXCR4    | chemokine (C-X-C motif) receptor 4                                  | AF348491  | 7852  | H |
| 220285_at   | FAM108B1 | family with sequence similarity 108, member B1                      | NM_016014 | 51104 | H |
| 220528_at   | VNN3     | vanin 3                                                             | NM_018399 | 55350 | H |
| 206912_at   | FOXE1    | forkhead box E1 (thyroid transcription factor 2)                    | NM_004473 | 2304  | H |
| 216316_x_at | GK       | glycerol kinase                                                     | X78713    | 2710  | H |
| 219316_s_at | FLVCR2   | feline leukemia virus subgroup C cellular receptor family, member 2 | NM_017791 | 55640 | H |

|             |         |                                                                                 |           |       |   |
|-------------|---------|---------------------------------------------------------------------------------|-----------|-------|---|
| 220249_at   | HYAL4   | hyaluronoglucosaminidase 4                                                      | NM_012269 | 23553 | H |
| 219684_at   | RTP4    | receptor (chemosensory) transporter protein 4                                   | NM_022147 | 64108 | H |
| 221416_at   | PLA2G2F | phospholipase A2, group IIF                                                     | NM_022819 | 64600 | H |
| 212481_s_at | TPM4    | tropomyosin 4                                                                   | AI214061  | 7171  | H |
| 200730_s_at | PTP4A1  | protein tyrosine phosphatase type IVA, member 1                                 | BF576710  | 7803  | H |
| 217678_at   | SLC7A11 | solute carrier family 7, (cationic amino acid transporter, y+ system) member 11 | AA488687  | 23657 | H |
| 218349_s_at | ZWILCH  | Zwilch, kinetochore associated, homolog (Drosophila)                            | AA824298  | 55055 | H |
| 208910_s_at | C1QBP   | complement component 1, q subcomponent binding protein                          | L04636    | 708   | H |
| 209024_s_at | SYNCRIP | synaptotagmin binding, cytoplasmic RNA interacting protein                      | AI472757  | 10492 | H |
| 213741_s_at | KPNA1   | karyopherin alpha 1 (importin alpha 5)                                          | BF575685  | 3836  | H |
| 214168_s_at | TJP1    | tight junction protein 1 (zona occludens 1)                                     | AA813018  | 7082  | H |



|             |          |                                                                                                                            |           |           |   |
|-------------|----------|----------------------------------------------------------------------------------------------------------------------------|-----------|-----------|---|
| 203362_s_at | MAD2L1   | MAD2 mitotic arrest deficient-like 1 (yeast)                                                                               | NM_002358 | 4085      | H |
| 204678_s_at | KCNK1    | potassium channel, subfamily K, member 1                                                                                   | U90065    | 3775      | H |
| 219099_at   | C12orf5  | chromosome 12 open reading frame 5                                                                                         | NM_020375 | 5710<br>3 | H |
| 220620_at   | CRCT1    | cysteine-rich C-terminal 1                                                                                                 | NM_019060 | 5454<br>4 | H |
| 217785_s_at | YKT6     | YKT6 v-SNARE homolog ( <i>S. cerevisiae</i> )                                                                              | NM_006555 | 1065<br>2 | H |
| 217924_at   | C6orf106 | chromosome 6 open reading frame 106                                                                                        | AL523965  | 6477<br>1 | H |
| 204751_x_at | DSC2     | desmocollin 2                                                                                                              | NM_004949 | 1824      | H |
| 205220_at   | GPR109B  | G protein-coupled receptor 109B                                                                                            | NM_006018 | 8843      | H |
| 201537_s_at | DUSP3    | dual specificity phosphatase 3 ( <i>vaccinia virus</i> phosphatase VH1-related)                                            | AL048503  | 1845      | H |
| 204747_at   | IFIT3    | interferon-induced protein with tetratricopeptide repeats 3                                                                | NM_001549 | 3437      | H |
| 210559_s_at | CDC2     | cell division cycle 2, G1 to S and G2 to M                                                                                 | D88357    | 983       | H |
| 210834_s_at | PTGER3   | prostaglandin E receptor 3 (subtype EP3)                                                                                   | AL031429  | 5733      | H |
| 209507_at   | RPA3     | replication protein A3, 14kDa                                                                                              | BC005264  | 6119      | H |
| 212379_at   | GART     | phosphoribosylglycinamide formyltransferase, phosphoribosylglycinamide synthetase, phosphoribosylaminoimidazole synthetase | BE966876  | 2618      | H |
| 218951_     | PLCXD1   | phosphatidylinositol-specific phospholipase C, X domain containing 1                                                       | NM_018    | 5534      | H |

|             |          |                                                                                                                            |           |       |   |
|-------------|----------|----------------------------------------------------------------------------------------------------------------------------|-----------|-------|---|
| s_at        |          |                                                                                                                            | 390       | 4     |   |
| 219389_at   | SUSD4    | sushi domain containing 4                                                                                                  | NM_017982 | 55061 | H |
| 212378_at   | GART     | phosphoribosylglycinamide formyltransferase, phosphoribosylglycinamide synthetase, phosphoribosylaminoimidazole synthetase | NM_000819 | 2618  | H |
| 212737_at   | GM2A     | GM2 ganglioside activator                                                                                                  | AL513583  | 2760  | H |
| 211715_s_at | BDH1     | 3-hydroxybutyrate dehydrogenase, type 1                                                                                    | BC005844  | 622   | H |
| 211788_s_at | TREX2    | three prime repair exonuclease 2                                                                                           | AF319573  | 11219 | H |
| 210357_s_at | SMOX     | spermine oxidase                                                                                                           | BC000669  | 54498 | H |
| 211622_s_at | ARF3     | ADP-ribosylation factor 3                                                                                                  | M33384    | 377   | H |
| 209679_s_at | LOC57228 | small trans-membrane and glycosylated protein                                                                              | BC003379  | 57228 | H |
| 209744_x_at | ITCH     | itchy homolog E3 ubiquitin protein ligase (mouse)                                                                          | AB056663  | 83737 | H |
| 209093_s_at | GBA      | glucosidase, beta; acid (includes glucosylceramidase)                                                                      | K02920    | 2629  | H |

|             |           |                                                                          |           |       |   |
|-------------|-----------|--------------------------------------------------------------------------|-----------|-------|---|
| 209186_at   | ATP2A2    | ATPase, Ca <sup>++</sup> transporting, cardiac muscle, slow twitch 2     | M23114    | 488   | H |
| 207008_at   | IL8RB     | interleukin 8 receptor, beta                                             | NM_001557 | 3579  | H |
| 207992_s_at | AMPD3     | adenosine monophosphate deaminase (isoform E)                            | NM_000480 | 272   | H |
| 206421_s_at | SERPIN B7 | serpin peptidase inhibitor, clade B (ovalbumin), member 7                | NM_003784 | 8710  | H |
| 206553_at   | OAS2      | 2'-5'-oligoadenylate synthetase 2, 69/71kDa                              | NM_002535 | 4939  | H |
| 205064_at   | SPRR1B    | small proline-rich protein 1B (cornifin)                                 | NM_003125 | 6699  | H |
| 205590_at   | RASGRP 1  | RAS guanyl releasing protein 1 (calcium and DAG-regulated)               | NM_005739 | 10125 | H |
| 204415_at   | IFI6      | interferon, alpha-inducible protein 6                                    | NM_022873 | 2537  | H |
| 204478_s_at | RABIF     | RAB interacting factor                                                   | U74324    | 5877  | H |
| 203665_at   | HMOX1     | heme oxygenase (decycling) 1                                             | NM_002133 | 3162  | H |
| 203740_at   | MPHOSP H6 | M-phase phosphoprotein 6                                                 | NM_005792 | 10200 | H |
| 202788_at   | MAPKAP K3 | mitogen-activated protein kinase-activated protein kinase 3              | NM_004635 | 7867  | H |
| 202831_at   | GPX2      | glutathione peroxidase 2 (gastrointestinal)                              | NM_002083 | 2877  | H |
| 201243_s_at | ATP1B1    | ATPase, Na <sup>+</sup> /K <sup>+</sup> transporting, beta 1 polypeptide | NM_001677 | 481   | H |

|             |           |                                                             |           |        |   |
|-------------|-----------|-------------------------------------------------------------|-----------|--------|---|
| 201274_at   | PSMA5     | proteasome (prosome, macropain) subunit, alpha type, 5      | NM_002790 | 5686   | H |
| 200734_s_at | ARF3      | ADP-ribosylation factor 3                                   | BG341906  | 377    | H |
| 200776_s_at | LOC151579 | similar to basic leucine zipper and W2 domains 1            | AL518328  | 151579 | H |
| 220664_at   | SPRR2C    | small proline-rich protein 2C                               | NM_006518 | 6702   | H |
| 220944_at   | PGLYRP4   | peptidoglycan recognition protein 4                         | NM_020393 | 57115  | H |
| 220239_at   | KLHL7     | kelch-like 7 (Drosophila)                                   | NM_018846 | 55975  | H |
| 220318_at   | EPN3      | epsin 3                                                     | NM_017957 | 55040  | H |
| 219799_s_at | DHRS9     | dehydrogenase/reductase (SDR family) member 9               | NM_005771 | 10170  | H |
| 220013_at   | ABHD9     | abhydrolase domain containing 9                             | NM_024794 | 79852  | H |
| 219352_at   | HERC6     | hect domain and RLD 6                                       | NM_017912 | 55008  | H |
| 219795_at   | SLC6A14   | solute carrier family 6 (amino acid transporter), member 14 | NM_007231 | 11254  | H |
| 218890_x_at | MRPL35    | mitochondrial ribosomal protein L35                         | NM_016622 | 51318  | H |
| 219015_s_at | ALG13     | asparagine-linked glycosylation 13 homolog (S. cerevisiae)  | BC005336  | 55849  | H |
| 218817_at   | SPCS3     | signal peptidase complex subunit 3 homolog (S. cerevisiae)  | NM_021928 | 60559  | H |
| 218856_at   | TNFRSF21  | tumor necrosis factor receptor superfamily, member 21       | NM_016629 | 27242  | H |

|             |          |                                                                 |           |        |   |
|-------------|----------|-----------------------------------------------------------------|-----------|--------|---|
| 218542_at   | CEP55    | centrosomal protein 55kDa                                       | NM_018131 | 55165  | H |
| 218719_s_at | GIN3     | GIN3 complex subunit 3 (Psf3 homolog)                           | NM_022770 | 64785  | H |
| 218400_at   | OAS3     | 2'-5'-oligoadenylate synthetase 3, 100kDa                       | NM_006187 | 4940   | H |
| 218512_at   | WDR12    | WD repeat domain 12                                             | NM_018256 | 55759  | H |
| 217315_s_at | KLK13    | kallikrein-related peptidase 13                                 | AL050220  | 26085  | H |
| 217475_s_at | LIMK2    | LIM domain kinase 2                                             | AC002073  | 3985   | H |
| 215891_s_at | GM2A     | GM2 ganglioside activator                                       | X61094    | 2760   | H |
| 215966_x_at | GK3P     | glycerol kinase 3 pseudogene                                    | AA292874  | 2713   | H |
| 213696_s_at | MED8     | mediator complex subunit 8                                      | AA421957  | 112950 | H |
| 213710_s_at |          |                                                                 | AL523275  |        |   |
| 208012_x_at | SP110    | SP110 nuclear body protein                                      | NM_004509 | 3431   | H |
| 208967_s_at | AK2      | adenylate kinase 2                                              | U39945    | 204    | H |
| 205513_at   | TCN1     | transcobalamin I (vitamin B12 binding protein, R binder family) | NM_001062 | 6947   | H |
| 205863_at   | S100A12  | S100 calcium binding protein A12                                | NM_005621 | 6283   | H |
| 204058_at   | ME1      | malic enzyme 1, NADP(+)-dependent, cytosolic                    | AL049699  | 4199   | H |
| 204385_at   | KYNU     | kynureninase (L-kynurenine hydrolase)                           | NM_003937 | 8942   | H |
| 218448_at   | C20orf11 | chromosome 20 open reading frame 11                             | NM_017    | 5499   | H |

|             |         |                                                       |           |       |   |
|-------------|---------|-------------------------------------------------------|-----------|-------|---|
| at          |         |                                                       | 896       | 4     |   |
| 218943_s_at | DDX58   | DEAD (Asp-Glu-Ala-Asp) box polypeptide 58             | NM_014314 | 23586 | H |
| 219095_at   | PLA2G4B | phospholipase A2, group IVB (cytosolic)               | NM_005090 | 8681  | H |
| 219691_at   | SAMD9   | sterile alpha motif domain containing 9               | NM_017654 | 54809 | H |
| 214512_s_at | SUB1    | SUB1 homolog ( <i>S. cerevisiae</i> )                 | NM_006713 | 10923 | H |
| 214583_at   | RSC1A1  | regulatory solute carrier protein, family 1, member 1 | AI268381  | 6248  | H |
| 217919_s_at | MRPL42  | mitochondrial ribosomal protein L42                   | AL136659  | 28977 | H |
| 208456_s_at | RRAS2   | related RAS viral (r-ras) oncogene homolog 2          | NM_012250 | 22800 | H |
| 208539_x_at | SPRR2D  | small proline-rich protein 2D                         | NM_006945 | 6703  | H |
| 213927_at   | MAP3K9  | mitogen-activated protein kinase kinase kinase 9      | AV753204  | 4293  | H |
| 216804_s_at | PDLIM5  | PDZ and LIM domain 5                                  | AK027217  | 10611 | H |
| 209363_s_at | MED21   | mediator complex subunit 21                           | U46837    | 9412  | H |
| 211075_s_at | CD47    | CD47 molecule                                         | Z25521    | 961   | H |
| 207181_s_at | CASP7   | caspase 7, apoptosis-related cysteine peptidase       | NM_001227 | 840   | H |
| 207387_     | GK      | glycerol kinase                                       | NM_000    | 2710  | H |

|             |         |                                                                                     |           |       |   |
|-------------|---------|-------------------------------------------------------------------------------------|-----------|-------|---|
| s_at        |         |                                                                                     | 167       |       |   |
| 206164_at   | CLCA2   | chloride channel, calcium activated, family member 2                                | NM_006536 | 9635  | H |
| 206166_s_at | CLCA2   | chloride channel, calcium activated, family member 2                                | AF043977  | 9635  | H |
| 216607_s_at | CYP51A1 | cytochrome P450, family 51, subfamily A, polypeptide 1                              | U40053    | 1595  | H |
| 217388_s_at | KYNU    | kynureninase (L-kynurenine hydrolase)                                               | D55639    | 8942  | H |
| 209208_at   | MPDU1   | mannose-P-dolichol utilization defect 1                                             | AF059752  | 9526  | H |
| 209872_s_at | PKP3    | plakophilin 3                                                                       | BF001503  | 11187 | H |
| 203125_x_at | SLC11A2 | solute carrier family 11 (proton-coupled divalent metal ion transporters), member 2 | AF046997  | 4891  | H |
| 203972_s_at | PEX3    | peroxisomal biogenesis factor 3                                                     | AB035307  | 8504  | H |
| 214070_s_at | ATP10B  | ATPase, Class V, type 10B                                                           | AW006935  | 23120 | H |
| 217202_s_at | GLUL    | glutamate-ammonia ligase (glutamine synthetase)                                     | U08626    | 2752  | H |
| 209949_at   | NCF2    | neutrophil cytosolic factor 2 (65kDa, chronic granulomatous disease, autosomal 2)   | BC001606  | 4688  | H |
| 209970_x_at | CASP1   | caspase 1, apoptosis-related cysteine peptidase (interleukin 1, beta, convertase)   | M87507    | 834   | H |
| 209142_s_at | UBE2G1  | ubiquitin-conjugating enzyme E2G 1 (UBC7 homolog, yeast)                            | BC002775  | 7326  | H |
| 209456_s_at | FBXW11  | F-box and WD repeat domain containing 11                                            | AB033281  | 23291 | H |

|             |         |                                                             |           |       |   |
|-------------|---------|-------------------------------------------------------------|-----------|-------|---|
|             |         |                                                             |           |       |   |
| 206302_s_at | NUDT4   | nudix (nucleoside diphosphate linked moiety X)-type motif 4 | NM_019094 | 11163 | H |
| 206748_s_at | SPAG9   | sperm associated antigen 9                                  | NM_003971 | 9043  | H |
| 201487_at   | CTSC    | cathepsin C                                                 | NM_001814 | 1075  | H |
| 201739_at   | SGK     | serum/glucocorticoid regulated kinase                       | NM_005627 | 6446  | H |
| 200803_s_at | TEGT    | testis enhanced gene transcript (BAX inhibitor 1)           | NM_003217 | 7009  | H |
| 200806_s_at | HSPD1   | heat shock 60kDa protein 1 (chaperonin)                     | BE256479  | 3329  | H |
| 200648_s_at | GLUL    | glutamate-ammonia ligase (glutamine synthetase)             | NM_002065 | 2752  | H |
| 200669_s_at | UBE2D3  | ubiquitin-conjugating enzyme E2D 3 (UBC4/5 homolog, yeast)  | NM_003340 | 7323  | H |
| 217028_at   | CXCR4   | chemokine (C-X-C motif) receptor 4                          | AJ224869  | 7852  | H |
| 218095_s_at | TMEM165 | transmembrane protein 165                                   | BC003545  | 55858 | H |
| 214697_s_at | ROD1    | ROD1 regulator of differentiation 1 (S. pombe)              | AW190873  | 9991  | H |
| 216640_s_at | PDIA6   | protein disulfide isomerase family A, member 6              | AK026926  | 10130 | H |
| 213060_s_at | CHI3L2  | chitinase 3-like 2                                          | U58515    | 1117  | H |



|             |        |                                                        |           |       |   |
|-------------|--------|--------------------------------------------------------|-----------|-------|---|
|             |        |                                                        |           |       |   |
| 213320_at   | PRMT3  | protein arginine methyltransferase 3                   | AL551971  | 10196 | H |
| 210951_x_at | RAB27A | RAB27A, member RAS oncogene family                     | AF125393  | 5873  | H |
| 211676_s_at | IFNGR1 | interferon gamma receptor 1                            | AF056979  | 3459  | H |
| 210594_x_at | MPZL1  | myelin protein zero-like 1                             | AF239756  | 9019  | H |
| 210638_s_at | FBXO9  | F-box protein 9                                        | AF176704  | 2628  | H |
| 207098_s_at | MFN1   | mitofusin 1                                            | NM_017927 | 55669 | H |
| 209520_s_at | NCBP1  | nuclear cap binding protein subunit 1, 80kDa           | BC001450  | 4686  | H |
| 204905_s_at | EEF1E1 | eukaryotic translation elongation factor 1 epsilon 1   | NM_004280 | 9521  | H |
| 205126_at   | VRK2   | vaccinia related kinase 2                              | NM_006296 | 7444  | H |
| 221962_s_at | UBE2H  | ubiquitin-conjugating enzyme E2H (UBC8 homolog, yeast) | AI829920  | 7328  | H |

|             |          |                                                                                |           |       |   |
|-------------|----------|--------------------------------------------------------------------------------|-----------|-------|---|
| 200889_s_at | SSR1     | signal sequence receptor, alpha (translocon-associated protein alpha)          | NM_003144 | 6745  | H |
| 200987_x_at | PSME3    | proteasome (prosome, macropain) activator subunit 3 (PA28 gamma; Ki)           | AA758755  | 10197 | H |
| 219648_at   | MREG     | melanoregulin                                                                  | NM_018000 | 55686 | H |
| 219960_s_at | UCHL5    | ubiquitin carboxyl-terminal hydrolase L5                                       | NM_015984 | 51377 | H |
| 214435_x_at | RALA     | v-ral simian leukemia viral oncogene homolog A (ras related)                   | NM_005402 | 5898  | H |
| 214446_at   | ELL2     | elongation factor, RNA polymerase II, 2                                        | NM_012081 | 22936 | H |
| 212102_s_at | KPNA6    | karyopherin alpha 6 (importin alpha 7)                                         | BG403834  | 23633 | H |
| 212219_at   | PSME4    | proteasome (prosome, macropain) activator subunit 4                            | D38521    | 23198 | H |
| 204240_s_at | SMC2     | structural maintenance of chromosomes 2                                        | NM_006444 | 10592 | H |
| 204614_at   | SERPINB2 | serpin peptidase inhibitor, clade B (ovalbumin), member 2                      | NM_002575 | 5055  | H |
| 202430_s_at | PLSCR1   | phospholipid scramblase 1                                                      | NM_021105 | 5359  | H |
| 202626_s_at | LYN      | v-yes-1 Yamaguchi sarcoma viral related oncogene homolog                       | AI356412  | 4067  | H |
| 202269_x_at | GBP1     | guanylate binding protein 1, interferon-inducible, 67kDa                       | NM_002053 | 2633  | H |
| 202352_s_at | PSMD12   | proteasome (prosome, macropain) 26S subunit, non-ATPase, 12                    | AI446530  | 5718  | H |
| 201048_x_at | RAB6A    | RAB6A, member RAS oncogene family                                              | NM_002869 | 5870  | H |
| 201195_     | SLC7A5   | solute carrier family 7 (cationic amino acid transporter, y+ system), member 5 | AB0180    | 8140  | H |

|             |          |                                                                      |           |       |   |
|-------------|----------|----------------------------------------------------------------------|-----------|-------|---|
| s_at        |          |                                                                      | 09        |       |   |
| 204761_at   | USP6NL   | USP6 N-terminal like                                                 | NM_014688 | 9712  | H |
| 204809_at   | CLPX     | ClpX caseinolytic peptidase X homolog (E. coli)                      | NM_006660 | 10845 | H |
| 203358_s_at | EZH2     | enhancer of zeste homolog 2 (Drosophila)                             | NM_004456 | 2146  | H |
| 203770_s_at | STS      | steroid sulfatase (microsomal), isozyme S                            | NM_000351 | 412   | H |
| 211906_s_at | SERPINB4 | serpin peptidase inhibitor, clade B (ovalbumin), member 4            | AB046400  | 6318  | H |
| 212009_s_at | STIP1    | stress-induced-phosphoprotein 1 (Hsp70/Hsp90-organizing protein)     | AL553320  | 10963 | H |
| 209853_s_at | PSME3    | proteasome (prosome, macropain) activator subunit 3 (PA28 gamma; Ki) | BC001423  | 10197 | H |
| 210186_s_at | FKBP1A   | FK506 binding protein 1A, 12kDa                                      | BC005147  | 2280  | H |
| 207126_x_at | UGT1A1   | UDP glucuronosyltransferase 1 family, polypeptide A1                 | NM_000463 | 54658 | H |
| 207356_at   | DEFB4    | defensin, beta 4                                                     | NM_004942 | 1673  | H |
| 206628_at   | SLC5A1   | solute carrier family 5 (sodium/glucose cotransporter), member 1     | NM_000343 | 6523  | H |
| 206911_at   | TRIM25   | tripartite motif-containing 25                                       | NM_005082 | 7706  | H |
| 210138_     | RGS20    | regulator of G-protein signaling 20                                  | AF0749    | 8601  | H |

|             |         |                                                                                             |           |       |   |
|-------------|---------|---------------------------------------------------------------------------------------------|-----------|-------|---|
| at          |         |                                                                                             | 79        |       |   |
| 210317_s_at | YWHAE   | tyrosine 3-monooxygenase/tryptophan 5-monooxygenase activation protein, epsilon polypeptide | U28936    | 7531  | H |
| 205016_at   | TGFA    | transforming growth factor, alpha                                                           | NM_003236 | 7039  | H |
| 205483_s_at | ISG15   | ISG15 ubiquitin-like modifier                                                               | NM_005101 | 9636  | H |
| 206562_s_at | CSNK1A1 | casein kinase 1, alpha 1                                                                    | NM_001892 | 1452  | H |
| 206605_at   | P11     | 26 serine protease                                                                          | NM_006025 | 8909  | H |
| 206491_s_at | NAPA    | N-ethylmaleimide-sensitive factor attachment protein, alpha                                 | NM_003827 | 8775  | H |
| 206561_s_at | AKR1B10 | aldo-keto reductase family 1, member B10 (aldose reductase)                                 | NM_020299 | 57016 | H |
| 206303_s_at | NUDT4   | nudix (nucleoside diphosphate linked moiety X)-type motif 4                                 | NM_019094 | 11163 | H |

|             |        |                                                            |           |           |   |
|-------------|--------|------------------------------------------------------------|-----------|-----------|---|
| 206409_at   | TIAM1  | T-cell lymphoma invasion and metastasis 1                  | NM_003253 | 7074      | H |
| 206177_s_at | ARG1   | arginase, liver                                            | NM_000045 | 383       | H |
| 206193_s_at | CDSN   | corneodesmosin                                             | NM_001264 | 1041      | H |
| 205990_s_at | WNT5A  | wingless-type MMTV integration site family, member 5A      | NM_003392 | 7474      | H |
| 206125_s_at | KLK8   | kallikrein-related peptidase 8                             | NM_007196 | 1120<br>2 | H |
| 205822_s_at | HMGCS1 | 3-hydroxy-3-methylglutaryl-Coenzyme A synthase 1 (soluble) | NM_002130 | 3157      | H |
| 205844_at   | VNN1   | vanin 1                                                    | NM_004666 | 8876      | H |
| 205767_at   | EREG   | epiregulin                                                 | NM_001432 | 2069      | H |
| 205778_at   | KLK7   | kallikrein-related peptidase 7                             | NM_005046 | 5650      | H |

|             |         |                                                              |           |       |   |
|-------------|---------|--------------------------------------------------------------|-----------|-------|---|
| 205724_at   | PKP1    | plakophilin 1 (ectodermal dysplasia/skin fragility syndrome) | NM_000299 | 5317  | H |
| 205729_at   | OSMR    | oncostatin M receptor                                        | NM_003999 | 9180  | H |
| 205552_s_at | OAS1    | 2',5'-oligoadenylate synthetase 1, 40/46kDa                  | NM_002534 | 4938  | H |
| 205569_at   | LAMP3   | lysosomal-associated membrane protein 3                      | NM_014398 | 27074 | H |
| 204972_at   | OAS2    | 2'-5'-oligoadenylate synthetase 2, 69/71kDa                  | NM_016817 | 4939  | H |
| 204995_at   | CDK5R1  | cyclin-dependent kinase 5, regulatory subunit 1 (p35)        | AL567411  | 8851  | H |
| 204841_s_at | EEA1    | early endosome antigen 1                                     | NM_003566 | 8411  | H |
| 204967_at   | SHROOM2 | shroom family member 2                                       | NM_001649 | 357   | H |
| 204527_at   | MYO5A   | myosin VA (heavy chain 12, myoxin)                           | NM_000259 | 4644  | H |
| 204532_x_at | UGT1A9  | UDP glucuronosyltransferase 1 family, polypeptide A9         | NM_021027 | 54600 | H |

|             |        |                                                          |           |       |   |
|-------------|--------|----------------------------------------------------------|-----------|-------|---|
|             |        |                                                          |           |       |   |
| 204444_at   | KIF11  | kinesin family member 11                                 | NM_004523 | 3832  | H |
| 204465_s_at | INA    | internexin neuronal intermediate filament protein, alpha | NM_004692 | 9118  | H |
| 204147_s_at | TFDP1  | transcription factor Dp-1                                | NM_007111 | 7027  | H |
| 204224_s_at | GCH1   | GTP cyclohydrolase 1 (dopa-responsive dystonia)          | NM_000161 | 2643  | H |
| 204059_s_at | ME1    | malic enzyme 1, NADP(+)-dependent, cytosolic             | NM_002395 | 4199  | H |
| 204128_s_at | RFC3   | replication factor C (activator 1) 3, 38kDa              | BC000149  | 5983  | H |
| 203798_s_at | VSNL1  | visinin-like 1                                           | NM_003385 | 7447  | H |
| 203964_at   | NMI    | N-myc (and STAT) interactor                              | NM_004688 | 9111  | H |
| 203779_s_at | MPZL2  | myelin protein zero-like 2                               | NM_005797 | 10205 | H |
| 203780_at   | MPZL2  | myelin protein zero-like 2                               | AF275945  | 10205 | H |
| 203691_at   | PI3    | peptidase inhibitor 3, skin-derived (SKALP)              | NM_002638 | 5266  | H |
| 203699_s_at | DIO2   | deiodinase, iodothyronine, type II                       | U53506    | 1734  | H |
| 203471_s_at | PLEK   | pleckstrin                                               | NM_002664 | 5341  | H |
| 203641_s_at | COBLL1 | COBL-like 1                                              | NM_014900 | 22837 | H |
| 203311_s_at | ARF6   | ADP-ribosylation factor 6                                | NM_001663 | 382   | H |

|             |          |                                                                         |           |       |   |
|-------------|----------|-------------------------------------------------------------------------|-----------|-------|---|
|             |          |                                                                         |           |       |   |
| 203360_s_at | MYCBP    | c-myc binding protein                                                   | D50692    | 26292 | H |
| 203207_s_at | MTFR1    | mitochondrial fission regulator 1                                       | BF214329  | 9650  | H |
| 203293_s_at | LMAN1    | lectin, mannose-binding, 1                                              | NM_005570 | 3998  | H |
| 203032_s_at | FH       | fumarate hydratase                                                      | NM_000143 | 2271  | H |
| 203148_s_at | TRIM14   | tripartite motif-containing 14                                          | NM_014788 | 9830  | H |
| 202886_s_at | PPP2R1B  | protein phosphatase 2 (formerly 2A), regulatory subunit A, beta isoform | M65254    | 5519  | H |
| 202889_x_at | MAP7     | microtubule-associated protein 7                                        | T62571    | 9053  | H |
| 202805_s_at | ABCC1    | ATP-binding cassette, sub-family C (CFTR/MRP), member 1                 | NM_004996 | 4363  | H |
| 202869_at   | OAS1     | 2',5'-oligoadenylate synthetase 1, 40/46kDa                             | NM_016816 | 4938  | H |
| 202697_at   | NUDT21   | nudix (nucleoside diphosphate linked moiety X)-type motif 21            | NM_007006 | 11051 | H |
| 202787_s_at | MAPKAPK3 | mitogen-activated protein kinase-activated protein kinase 3             | NM_004635 | 7867  | H |
| 202604_x_at | ADAM10   | ADAM metalloproteinase domain 10                                        | NM_001110 | 102   | H |



|             |          |                                                                        |           |       |   |
|-------------|----------|------------------------------------------------------------------------|-----------|-------|---|
|             |          |                                                                        |           |       |   |
| 202693_s_at | STK17A   | serine/threonine kinase 17a                                            | NM_004760 | 9263  | H |
| 202446_s_at | PLSCR1   | phospholipid scramblase 1                                              | AI825926  | 5359  | H |
| 202595_s_at | LEPROTL1 | leptin receptor overlapping transcript-like 1                          | BC000642  | 23484 | H |
| 202357_s_at | CFB      | complement factor B                                                    | NM_001710 | 629   | H |
| 202411_at   | IFI27    | interferon, alpha-inducible protein 27                                 | NM_005532 | 3429  | H |
| 202195_s_at | TMED5    | transmembrane emp24 protein transport domain containing 5              | NM_016040 | 50999 | H |
| 202236_s_at | SLC16A1  | solute carrier family 16, member 1 (monocarboxylic acid transporter 1) | NM_003051 | 6566  | H |
| 201946_s_at | CCT2     | chaperonin containing TCP1, subunit 2 (beta)                           | AL545982  | 10576 | H |
| 202064_s_at | SEL1L    | sel-1 suppressor of lin-12-like (C. elegans)                           | AF052059  | 6400  | H |
| 201821_s_at | TIMM17A  | translocase of inner mitochondrial membrane 17 homolog A (yeast)       | NM_006335 | 10440 | H |
| 201848_s_at | BNIP3    | BCL2/adenovirus E1B 19kDa interacting protein 3                        | U15174    | 664   | H |
| 201732_s_at | CLCN3    | chloride channel 3                                                     | NM_001829 | 1182  | H |
| 201733_at   | CLCN3    | chloride channel 3                                                     | AA902971  | 1182  | H |

|             |          |                                                                        |           |       |   |
|-------------|----------|------------------------------------------------------------------------|-----------|-------|---|
|             |          |                                                                        |           |       |   |
| 201629_s_at | ACP1     | acid phosphatase 1, soluble                                            | NM_004300 | 52    | H |
| 201663_s_at | SMC4     | structural maintenance of chromosomes 4                                | NM_005496 | 10051 | H |
| 201490_s_at | PPIF     | peptidylprolyl isomerase F (cyclophilin F)                             | NM_005729 | 10105 | H |
| 201523_x_at | UBE2N    | ubiquitin-conjugating enzyme E2N (UBC13 homolog, yeast)                | BE262760  | 7334  | H |
| 201469_s_at | SHC1     | SHC (Src homology 2 domain containing) transforming protein 1          | AI809967  | 6464  | H |
| 201476_s_at | RRM1     | ribonucleotide reductase M1 polypeptide                                | AI692974  | 6240  | H |
| 201118_at   | PGD      | phosphogluconate dehydrogenase                                         | NM_002631 | 5226  | H |
| 201196_s_at | AMD1     | adenosylmethionine decarboxylase 1                                     | M21154    | 262   | H |
| 201089_at   | ATP6V1B2 | ATPase, H <sup>+</sup> transporting, lysosomal 56/58kDa, V1 subunit B2 | NM_001693 | 526   | H |
| 201101_s_at | BCLAF1   | BCL2-associated transcription factor 1                                 | BE963370  | 9774  | H |

|             |        |                                                        |           |       |   |
|-------------|--------|--------------------------------------------------------|-----------|-------|---|
| 200838_at   | CTSB   | cathepsin B                                            | NM_001908 | 1508  | H |
| 200841_s_at | EPRS   | glutamyl-prolyl-tRNA synthetase                        | AI142677  | 2058  | H |
| 41469_at    | PI3    | peptidase inhibitor 3, skin-derived (SKALP)            | L10343    | 5266  | H |
| 200712_s_at | MAPRE1 | microtubule-associated protein, RP/EB family, member 1 | NM_012325 | 22919 | H |
| 200796_s_at | MCL1   | myeloid cell leukemia sequence 1 (BCL2-related)        | BF594446  | 4170  | H |
| 221903_s_at | CYLD   | cylindromatosis (turban tumor syndrome)                | BF516433  | 1540  | H |
| 266_s_at    | CD24   | CD24 molecule                                          | L33930    | 934   | H |
| 221487_s_at | ENSA   | endosulfine alpha                                      | AF067170  | 2029  | H |
| 221803_s_at | NRBF2  | nuclear receptor binding factor 2                      | AA883074  | 29982 | H |
| 220892_s_at | PSAT1  | phosphoserine aminotransferase 1                       | NM_021154 | 29968 | H |
| 221113_s_at | WNT16  | wingless-type MMTV integration site family, member 16  | NM_016087 | 51384 | H |
| 220322_at   | IL1F9  | interleukin 1 family, member 9                         | NM_019618 | 56300 | H |

|             |          |                                                             |           |       |   |
|-------------|----------|-------------------------------------------------------------|-----------|-------|---|
| 220724_at   | FLJ21511 | hypothetical protein FLJ21511                               | NM_025087 | 80157 | H |
| 219856_at   | C1orf116 | chromosome 1 open reading frame 116                         | NM_023938 | 79098 | H |
| 220104_at   | ZC3HAV1  | zinc finger CCCH-type, antiviral 1                          | NM_020119 | 56829 | H |
| 219630_at   | PDZK1IP1 | PDZK1 interacting protein 1                                 | NM_005764 | 10158 | H |
| 219722_s_at | GDPD3    | glycerophosphodiester phosphodiesterase domain containing 3 | NM_024307 | 79153 | H |
| 219412_at   | RAB38    | RAB38, member RAS oncogene family                           | NM_022337 | 23682 | H |
| 219428_s_at | PXMP4    | peroxisomal membrane protein 4, 24kDa                       | NM_007238 | 11264 | H |
| 219289_at   | HEATR3   | HEAT repeat containing 3                                    | NM_017939 | 55027 | H |
| 219403_s_at | HPSE     | heparanase                                                  | AF155510  | 10855 | H |
| 219253_at   | TMEM185B | transmembrane protein 185B                                  | NM_024121 | 79134 | H |
| 219267_at   | GLTP     | glycolipid transfer protein                                 | NM_016433 | 51228 | H |
| 219121_s_at | RBM35A   | RNA binding motif protein 35A                               | NM_017697 | 54845 | H |
| 219209_at   | IFIH1    | interferon induced with helicase C domain 1                 | NM_022168 | 64135 | H |
| 219016_at   | FASTKD5  | FAST kinase domains 5                                       | NM_021826 | 60493 | H |
| 219079_at   | CYB5R4   | cytochrome b5 reductase 4                                   | NM_016230 | 51167 | H |
| 218810_at   | ZC3H12A  | zinc finger CCCH-type containing 12A                        | NM_025079 | 80149 | H |
| 218992_at   | C9orf46  | chromosome 9 open reading frame 46                          | NM_018465 | 55848 | H |

|             |          |                                                        |           |       |   |
|-------------|----------|--------------------------------------------------------|-----------|-------|---|
| 218295_s_at | NUP50    | nucleoporin 50kDa                                      | AF267865  | 10762 | H |
| 218454_at   | FLJ22662 | hypothetical protein FLJ22662                          | NM_024829 | 79887 | H |
| 218209_s_at | P15RS    | hypothetical protein FLJ10656                          | NM_018170 | 55197 | H |
| 218254_s_at | SAR1B    | SAR1 gene homolog B ( <i>S. cerevisiae</i> )           | NM_016103 | 51128 | H |
| 218073_s_at | TMEM48   | transmembrane protein 48                               | NM_018087 | 55706 | H |
| 218163_at   | MCTS1    | malignant T cell amplified sequence 1                  | NM_014060 | 28985 | H |
| 217921_at   | MAN1A2   | mannosidase, alpha, class 1A, member 2                 | BE543064  | 10905 | H |
| 217930_s_at | TOLLIP   | toll interacting protein                               | NM_019009 | 54472 | H |
| 217741_s_at | ZFAND5   | zinc finger, AN1-type domain 5                         | NM_006007 | 7763  | H |
| 217835_x_at | C20orf24 | chromosome 20 open reading frame 24                    | NM_018840 | 55969 | H |
| 217294_s_at | ENO1     | enolase 1, (alpha)                                     | U88968    | 2023  | H |
| 217356_s_at | PGK1     | phosphoglycerate kinase 1                              | S81916    | 5230  | H |
| 216598_s_at | CCL2     | chemokine (C-C motif) ligand 2                         | S69738    | 6347  | H |
| 216915_s_at | PTPN12   | protein tyrosine phosphatase, non-receptor type 12     | S69182    | 5782  | H |
| 216202_s_at | SPTLC2   | serine palmitoyltransferase, long chain base subunit 2 | U15555    | 9517  | H |

|             |            |                                                            |           |        |   |
|-------------|------------|------------------------------------------------------------|-----------|--------|---|
| 216258_s_at | SERPIN B13 | serpin peptidase inhibitor, clade B (ovalbumin), member 13 | BE148534  | 5275   | H |
| 215465_at   | ABCA12     | ATP-binding cassette, sub-family A (ABC1), member 12       | AL080207  | 26154  | H |
| 215471_s_at | MAP7       | microtubule-associated protein 7                           | AJ242502  | 9053   | H |
| 214499_s_at | BCLAF1     | BCL2-associated transcription factor 1                     | AF249273  | 9774   | H |
| 214581_x_at | TNFRSF 21  | tumor necrosis factor receptor superfamily, member 21      | BE568134  | 27242  | H |
| 214076_at   | GFOD2      | glucose-fructose oxidoreductase domain containing 2        | AI697803  | 81577  | H |
| 214119_s_at | FKBP1A     | FK506 binding protein 1A, 12kDa                            | AI936769  | 2280   | H |
| 213562_s_at | SQLE       | squalene epoxidase                                         | BF979497  | 6713   | H |
| 213851_at   | TMEM110    | transmembrane protein 110                                  | BG031677  | 375346 | H |
| 213189_at   | MINA       | MYC induced nuclear antigen                                | AI823896  | 84864  | H |
| 213425_at   | WNT5A      | wingless-type MMTV integration site family, member 5A      | AI968085  | 7474   | H |
| 212942_s_at | KIAA1199   | KIAA1199                                                   | AB033025  | 57214  | H |
| 212978_at   | LRR8B      | leucine rich repeat containing 8 family, member B          | AU146004  | 23507  | H |
| 212531_at   | LCN2       | lipocalin 2 (oncogene 24p3)                                | NM_005564 | 3934   | H |
| 212902_at   | SEC24A     | SEC24 related gene family, member A (S. cerevisiae)        | BE645231  | 10802  | H |
| 212016_s_at | PTBP1      | polypyrimidine tract binding protein 1                     | AA679988  | 5725   | H |

|                 |               |                                                                                       |               |           |   |
|-----------------|---------------|---------------------------------------------------------------------------------------|---------------|-----------|---|
| 212125_<br>at   | RANGAP<br>1   | Ran GTPase activating protein 1                                                       | NM_002<br>883 | 5905      | H |
| 211612_<br>s_at | IL13RA1       | interleukin 13 receptor, alpha 1                                                      | U62858        | 3597      | H |
| 211681_<br>s_at | PDLIM5        | PDZ and LIM domain 5                                                                  | AF1167<br>05  | 1061<br>1 | H |
| 211150_<br>s_at | DLAT          | dihydrolipoamide S-acetyltransferase (E2 component of pyruvate dehydrogenase complex) | J03866        | 1737      | H |
| 211362_<br>s_at | SERPIN<br>B13 | serpin peptidase inhibitor, clade B (ovalbumin), member 13                            | AF1699<br>49  | 5275      | H |
| 210852_<br>s_at | AASS          | aminoadipate-semialdehyde synthase                                                    | AF2291<br>80  | 1015<br>7 | H |
| 210935_<br>s_at | WDR1          | WD repeat domain 1                                                                    | AF2749<br>54  | 9948      | H |
| 210663_<br>s_at | KYNU          | kynureninase (L-kynurenine hydrolase)                                                 | BC0008<br>79  | 8942      | H |
| 210802_<br>s_at | DIMT1L        | DIM1 dimethyladenosine transferase 1-like ( <i>S. cerevisiae</i> )                    | BC0028<br>41  | 2729<br>2 | H |
| 210413_<br>x_at | SERPIN<br>B4  | serpin peptidase inhibitor, clade B (ovalbumin), member 4                             | U19557        | 6318      | H |
| 210449_<br>x_at | MAPK14        | mitogen-activated protein kinase 14                                                   | AF1005<br>44  | 1432      | H |

|                 |        |                                                                      |              |           |   |
|-----------------|--------|----------------------------------------------------------------------|--------------|-----------|---|
| 209882_<br>at   | RIT1   | Ras-like without CAAX 1                                              | AF0844<br>62 | 6016      | H |
| 210087_<br>s_at | MPZL1  | myelin protein zero-like 1                                           | AF0957<br>27 | 9019      | H |
| 209761_<br>s_at | SP110  | SP110 nuclear body protein                                           | AA9691<br>94 | 3431      | H |
| 209772_<br>s_at | CD24   | CD24 molecule                                                        | X69397       | 934       | H |
| 209231_<br>s_at | DCTN5  | dynactin 5 (p25)                                                     | BC0041<br>91 | 8451<br>6 | H |
| 209514_<br>s_at | RAB27A | RAB27A, member RAS oncogene family                                   | BE5020<br>30 | 5873      | H |
| 208952_<br>s_at | LARP5  | La ribonucleoprotein domain family, member 5                         | AU1543<br>58 | 2318<br>5 | H |
| 209188_<br>x_at | DR1    | down-regulator of transcription 1, TBP-binding (negative cofactor 2) | AW5169<br>32 | 1810      | H |
| 208932_<br>at   | PPP4C  | protein phosphatase 4 (formerly X), catalytic subunit                | BC0014<br>16 | 5531      | H |
| 208934_<br>s_at | LGALS8 | lectin, galactoside-binding, soluble, 8 (galectin 8)                 | AI65900<br>5 | 3964      | H |
| 208811_<br>s_at | DNAJB6 | DnaJ (Hsp40) homolog, subfamily B, member 6                          | AF0805<br>69 | 1004<br>9 | H |
| 208905_<br>at   | CYCS   | cytochrome c, somatic                                                | BC0052<br>99 | 5420<br>5 | H |
| 208708_<br>x_at | EIF5   | eukaryotic translation initiation factor 5                           | AL0801<br>02 | 1983      | H |
| 208744_<br>x_at | HSPH1  | heat shock 105kDa/110kDa protein 1                                   | D86956       | 1080<br>8 | H |
| 208621_<br>s_at | VIL2   | villin 2 (ezrin)                                                     | BF6631<br>41 | 7430      | H |



|             |          |                                                                   |           |        |   |
|-------------|----------|-------------------------------------------------------------------|-----------|--------|---|
|             |          |                                                                   |           |        |   |
| 208650_s_at | CD24     | CD24 molecule                                                     | BG327863  | 934    | H |
| 208290_s_at | EIF5     | eukaryotic translation initiation factor 5                        | NM_001969 | 1983   | H |
| 208309_s_at | MALT1    | mucosa associated lymphoid tissue lymphoma translocation gene 1   | NM_006785 | 10892  | H |
| 207791_s_at | RAB1A    | RAB1A, member RAS oncogene family                                 | NM_004161 | 5861   | H |
| 208103_s_at | ANP32E   | acidic (leucine-rich) nuclear phosphoprotein 32 family, member E  | NM_030920 | 81611  | H |
| 207367_at   | ATP12A   | ATPase, H+/K+ transporting, nongastric, alpha polypeptide         | NM_001676 | 479    | H |
| 207620_s_at | CASK     | calcium/calmodulin-dependent serine protein kinase (MAGUK family) | NM_003688 | 8573   | H |
| 214838_at   | SFT2D2   | SFT2 domain containing 2                                          | AL035297  | 375035 | H |
| 214959_s_at | API5     | apoptosis inhibitor 5                                             | AF229253  | 8539   | H |
| 209720_s_at | SERPINB3 | serpin peptidase inhibitor, clade B (ovalbumin), member 3         | BC005224  | 6317   | H |
| 209969_s_at | STAT1    | signal transducer and activator of transcription 1, 91kDa         | BC002704  | 6772   | H |
| 219358_s_at | CENTA2   | centaurin, alpha 2                                                | NM_018404 | 55803  | H |
| 219858_s_at | FLJ2016  | FLJ20160 protein                                                  | NM_017    | 5484   | H |

|             |         |                                                                            |           |       |   |
|-------------|---------|----------------------------------------------------------------------------|-----------|-------|---|
| s_at        | 0       |                                                                            | 694       | 2     |   |
| 212374_at   | FEM1B   | fem-1 homolog b ( <i>C. elegans</i> )                                      | NM_015322 | 10116 | H |
| 212479_s_at | RMND5A  | required for meiotic nuclear division 5 homolog A ( <i>S. cerevisiae</i> ) | AK022815  | 64795 | H |
| 35820_at    | GM2A    | GM2 ganglioside activator                                                  | M76477    | 2760  | H |
| 200628_s_at | WARS    | tryptophanyl-tRNA synthetase                                               | M61715    | 7453  | H |
| 200664_s_at | DNAJB1  | DnaJ (Hsp40) homolog, subfamily B, member 1                                | NM_006145 | 3337  | H |
| 32069_at    | N4BP1   | Nedd4 binding protein 1                                                    | AB014515  | 9683  | H |
| 33646_g_at  | GM2A    | GM2 ganglioside activator                                                  | X61094    | 2760  | H |
| 220599_s_at | CARD14  | caspase recruitment domain family, member 14                               | NM_024110 | 79092 | H |
| 220658_s_at | ARNTL2  | aryl hydrocarbon receptor nuclear translocator-like 2                      | NM_020183 | 56938 | H |
| 219990_at   | E2F8    | E2F transcription factor 8                                                 | NM_024680 | 79733 | H |
| 220066_at   | NOD2    | nucleotide-binding oligomerization domain containing 2                     | NM_022162 | 64127 | H |
| 217834_s_at | SYNCRIP | synaptotagmin binding, cytoplasmic RNA interacting protein                 | AL520908  | 10492 | H |
| 218049_s_at | MRPL13  | mitochondrial ribosomal protein L13                                        | NM_014078 | 28998 | H |
| 217738_at   | PBEF1   | pre-B-cell colony enhancing factor 1                                       | NM_005746 | 10135 | H |
| 217739_s_at | PBEF1   | pre-B-cell colony enhancing factor 1                                       | NM_005746 | 10135 | H |

|             |            |                                                            |          |       |   |
|-------------|------------|------------------------------------------------------------|----------|-------|---|
| s_at        |            |                                                            | 746      | 5     |   |
| 216379_x_at | CD24       | CD24 molecule                                              | AK000168 | 934   | H |
| 216684_s_at | SS18       | synovial sarcoma translocation, chromosome 18              | AF257501 | 6760  | H |
| 211361_s_at | SERPIN B13 | serpin peptidase inhibitor, clade B (ovalbumin), member 13 | AF169949 | 5275  | H |
| 211762_s_at | KPNA2      | karyopherin alpha 2 (RAG cohort 1, importin alpha 1)       | BC005978 | 3838  | H |
| 210833_at   | PTGER3     | prostaglandin E receptor 3 (subtype EP3)                   | AL031429 | 5733  | H |
| 210904_s_at | IL13RA1    | interleukin 13 receptor, alpha 1                           | U81380   | 3597  | H |
| 210652_s_at | C1orf34    | chromosome 1 open reading frame 34                         | BC004399 | 22996 | H |
| 210754_s_at | LYN        | v-src-1 Yamaguchi sarcoma viral related oncogene homolog   | M79321   | 4067  | H |
| 210458_s_at | TANK       | TRAF family member-associated NFKB activator               | BC003388 | 10010 | H |
| 210589_s_at | GBA        | glucosidase, beta; acid (includes glucosylceramidase)      | D13287   | 2629  | H |

|                 |         |                                                                                 |              |           |   |
|-----------------|---------|---------------------------------------------------------------------------------|--------------|-----------|---|
|                 |         |                                                                                 |              |           |   |
| 209925_<br>at   | OCLN    | occludin                                                                        | U53823       | 4950      | H |
| 210058_<br>at   | MAPK13  | mitogen-activated protein kinase 13                                             | BC0004<br>33 | 5603      | H |
| 209792_<br>s_at | KLK10   | kallikrein-related peptidase 10                                                 | BC0027<br>10 | 5655      | H |
| 209921_<br>at   | SLC7A11 | solute carrier family 7, (cationic amino acid transporter, y+ system) member 11 | AB0408<br>75 | 2365<br>7 | H |
| 209771_<br>x_at | CD24    | CD24 molecule                                                                   | AA7611<br>81 | 934       | H |
| 209773_<br>s_at | RRM2    | ribonucleotide reductase M2 polypeptide                                         | BC0018<br>86 | 6241      | H |
| 209218_<br>at   | SQLE    | squalene epoxidase                                                              | AF0988<br>65 | 6713      | H |

|             |           |                                                                        |           |       |   |
|-------------|-----------|------------------------------------------------------------------------|-----------|-------|---|
| 209719_x_at | SERPIN B3 | serpin peptidase inhibitor, clade B (ovalbumin), member 3              | BC005224  | 6317  | H |
| 208651_x_at | CD24      | CD24 molecule                                                          | BG327863  | 934   | H |
| 209025_s_at | SYNCRIP   | synaptotagmin binding, cytoplasmic RNA interacting protein             | AF037448  | 10492 | H |
| 208126_s_at | CYP2C18   | cytochrome P450, family 2, subfamily C, polypeptide 18                 | NM_000772 | 1562  | H |
| 208436_s_at | IRF7      | interferon regulatory factor 7                                         | NM_004030 | 3665  | H |
| 207381_at   | ALOX12B   | arachidonate 12-lipoxygenase, 12R type                                 | NM_001139 | 242   | H |
| 207654_x_at | DR1       | down-regulator of transcription 1, TBP-binding (negative cofactor 2)   | NM_001938 | 1810  | H |
| 207038_at   | SLC16A6   | solute carrier family 16, member 6 (monocarboxylic acid transporter 7) | NM_004694 | 9120  | H |
| 207254_at   | SLC15A1   | solute carrier family 15 (oligopeptide transporter), member 1          | NM_005073 | 6564  | H |
| 206499_s_at | RCC1      | regulator of chromosome condensation 1                                 | NM_001269 | 1104  | H |
| 207018_s_at | RAB27B    | RAB27B, member RAS oncogene family                                     | NM_004163 | 5874  | H |
| 205783_at   | KLK13     | kallikrein-related peptidase 13                                        | NM_015596 | 26085 | H |
| 206034_at   | SERPIN B8 | serpin peptidase inhibitor, clade B (ovalbumin), member 8              | NM_002640 | 5271  | H |
| 205246_at   | PEX13     | peroxisome biogenesis factor 13                                        | NM_002618 | 5194  | H |
| 205554_s_at | DNASE1L3  | deoxyribonuclease I-like 3                                             | NM_004944 | 1776  | H |
| 205008_     | CIB2      | calcium and integrin binding family member 2                           | NM_006    | 1051  | H |

|             |          |                                                                   |           |       |   |
|-------------|----------|-------------------------------------------------------------------|-----------|-------|---|
| s_at        |          |                                                                   | 383       | 8     |   |
| 205241_at   | SCO2     | SCO cytochrome oxidase deficient homolog 2 (yeast)                | NM_005138 | 9997  | H |
| 204616_at   | UCHL3    | ubiquitin carboxyl-terminal esterase L3 (ubiquitin thiolesterase) | NM_006002 | 7347  | H |
| 204638_at   | ACP5     | acid phosphatase 5, tartrate resistant                            | NM_001611 | 54    | H |
| 204170_s_at | CKS2     | CDC28 protein kinase regulatory subunit 2                         | NM_001827 | 1164  | H |
| 204341_at   | TRIM16   | tripartite motif-containing 16                                    | NM_006470 | 10626 | H |
| 203153_at   | IFIT1    | interferon-induced protein with tetratricopeptide repeats 1       | NM_001548 | 3434  | H |
| 203432_at   | TMPO     | thymopoietin                                                      | AW272611  | 7112  | H |
| 202539_s_at | HMGCR    | 3-hydroxy-3-methylglutaryl-Coenzyme A reductase                   | NM_000859 | 3156  | H |
| 202575_at   | CRABP2   | cellular retinoic acid binding protein 2                          | NM_001878 | 1382  | H |
| 202503_s_at | KIAA0101 | KIAA0101                                                          | NM_014736 | 9768  | H |
| 202533_s_at | DHFR     | dihydrofolate reductase                                           | NM_000791 | 1719  | H |
| 202069_s_at | IDH3A    | isocitrate dehydrogenase 3 (NAD+) alpha                           | NM_005530 | 3419  | H |
| 202134_s_at | WWTR1    | WW domain containing transcription regulator 1                    | NM_015472 | 25937 | H |
| 201890_at   | RRM2     | ribonucleotide reductase M2 polypeptide                           | BE966236  | 6241  | H |
| 202058_     | KPNA1    | karyopherin alpha 1 (importin alpha 5)                            | BC0023    | 3836  | H |

|             |           |                                                            |           |       |   |
|-------------|-----------|------------------------------------------------------------|-----------|-------|---|
| s_at        |           |                                                            | 74        |       |   |
| 201735_s_at | CLCN3     | chloride channel 3                                         | NM_001829 | 1182  | H |
| 201777_s_at | KIAA0494  | KIAA0494                                                   | BC002525  | 9813  | H |
| 201543_s_at | SAR1A     | SAR1 gene homolog A ( <i>S. cerevisiae</i> )               | NM_020150 | 56681 | H |
| 201673_s_at | GYS1      | glycogen synthase 1 (muscle)                               | NM_002103 | 2997  | H |
| 217140_s_at | VDAC1     | voltage-dependent anion channel 1                          | AJ002428  | 7416  | H |
| 217272_s_at | SERPINB13 | serpin peptidase inhibitor, clade B (ovalbumin), member 13 | AJ001698  | 5275  | H |
| 213342_at   | YAP1      | Yes-associated protein 1, 65kDa                            | AI745185  | 10413 | H |
| 213457_at   | MFHAS1    | malignant fibrous histiocytoma amplified sequence 1        | BF739959  | 9258  | H |
| 214681_at   | GK        | glycerol kinase                                            | AI830490  | 2710  | H |
| 217043_s_at | MFN1      | mitofusin 1                                                | U95822    | 55669 | H |
| 208951_at   | ALDH7A1   | aldehyde dehydrogenase 7 family, member A1                 | BC002515  | 501   | H |

|             |         |                                                                                    |           |       |   |
|-------------|---------|------------------------------------------------------------------------------------|-----------|-------|---|
|             |         |                                                                                    |           |       |   |
| 209080_x_at | GLRX3   | glutaredoxin 3                                                                     | AF118652  | 10539 | H |
| 221477_s_at | MGC5618 | hypothetical protein MGC5618                                                       | BC001980  | 79099 | H |
| 222223_s_at | IL1F5   | interleukin 1 family, member 5 (delta)                                             | AF216693  | 26525 | H |
| 209653_at   | KPNA4   | karyopherin alpha 4 (importin alpha 3)                                             | U93240    | 3840  | H |
| 209727_at   | GM2A    | GM2 ganglioside activator                                                          | M76477    | 2760  | H |
| 60528_at    | PLA2G4B | phospholipase A2, group IVB (cytosolic)                                            | N71116    | 8681  | H |
| 202525_at   | PRSS8   | protease, serine, 8                                                                | NM_002773 | 5652  | H |
| 203946_s_at | ARG2    | arginase, type II                                                                  | NM_001172 | 384   | H |
| 55081_at    | MICALL1 | MICAL-like 1                                                                       | W46406    | 85377 | H |
| 202086_     | MX1     | myxovirus (influenza virus) resistance 1, interferon-inducible protein p78 (mouse) | NM_002    | 4599  | H |



|             |        |                                                                                 |           |        |   |
|-------------|--------|---------------------------------------------------------------------------------|-----------|--------|---|
| at          |        |                                                                                 | 462       |        |   |
| 212142_at   | MCM4   | minichromosome maintenance complex component 4                                  | AI936566  | 4173   | H |
| 211016_x_at | HSPA4  | heat shock 70kDa protein 4                                                      | BC002526  | 3308   | H |
| 206004_at   | TGM3   | transglutaminase 3 (E polypeptide, protein-glutamine-gamma-glutamyltransferase) | NM_003245 | 7053   | H |
| 212246_at   | MCFD2  | multiple coagulation factor deficiency 2                                        | BE880828  | 90411  | H |
| 217192_s_at | PRDM1  | PR domain containing 1, with ZNF domain                                         | AL022067  | 639    | H |
| 221896_s_at | HIGD1A | HIG1 domain family, member 1A                                                   | BE739519  | 25994  | H |
| 201489_at   | PPIF   | peptidylprolyl isomerase F (cyclophilin F)                                      | BC005020  | 10105  | H |
| 201583_s_at | SEC23B | Sec23 homolog B ( <i>S. cerevisiae</i> )                                        | NM_006363 | 10483  | H |
| 214698_at   | ROD1   | ROD1 regulator of differentiation 1 ( <i>S. pombe</i> )                         | AW190873  | 9991   | H |
| 215438_x_at | GSPT1  | G1 to S phase transition 1                                                      | BE906054  | 2935   | H |
| 209125_at   |        |                                                                                 | J00269    | 140446 |   |
| 214580_x_at | KRT6A  | keratin 6A                                                                      | AL569511  | 3853   | H |
| 204203_at   | CEBPG  | CCAAT/enhancer binding protein (C/EBP), gamma                                   | NM_001806 | 1054   | H |
| 207291_at   | PRRG4  | proline rich Gla (G-carboxyglutamic acid) 4 (transmembrane)                     | NM_024081 | 79056  | H |
| 218009_s_at | PRC1   | protein regulator of cytokinesis 1                                              | NM_003981 | 9055   | H |
| 218039_     | NUSAP1 | nucleolar and spindle associated protein 1                                      | NM_016    | 5120   | H |

|             |           |                                            |           |        |   |
|-------------|-----------|--------------------------------------------|-----------|--------|---|
| at          |           |                                            | 359       | 3      |   |
| 213988_s_at | SAT1      | spermidine/spermine N1-acetyltransferase 1 | BE971383  | 6303   | H |
| 216834_at   | RGS1      | regulator of G-protein signaling 1         | S59049    | 5996   | H |
| 208901_s_at | TOP1      | topoisomerase (DNA) I                      | J03250    | 7150   | H |
| 212460_at   | C14orf147 | chromosome 14 open reading frame 147       | BE738425  | 171546 | H |
| 204146_at   | RAD51A P1 | RAD51 associated protein 1                 | BE966146  | 10635  | H |
| 204825_at   | MELK      | maternal embryonic leucine zipper kinase   | NM_014791 | 9833   | H |
| 201888_s_at | IL13RA1   | interleukin 13 receptor, alpha 1           | NM_001560 | 3597   | H |
| 202934_at   | HK2       | hexokinase 2                               | AI761561  | 3099   | H |
| 201292_at   | TOP2A     | topoisomerase (DNA) II alpha 170kDa        | AL561834  | 7153   | H |
| 201420_s_at | WDR77     | WD repeat domain 77                        | BF975273  | 79084  | H |

|             |         |                                                        |           |       |   |
|-------------|---------|--------------------------------------------------------|-----------|-------|---|
| 219296_at   | ZDHHC13 | zinc finger, DHHC-type containing 13                   | NM_019028 | 54503 | H |
| 33304_at    | ISG20   | interferon stimulated exonuclease gene 20kDa           | U88964    | 3669  | H |
| 218888_s_at | NETO2   | neuropilin (NRP) and tolloid (TLL)-like 2              | AI335263  | 81831 | H |
| 219503_s_at | TMEM40  | transmembrane protein 40                               | AI087937  | 55287 | H |
| 219657_s_at | KLF3    | Kruppel-like factor 3 (basic)                          | AF285837  | 51274 | H |
| 200750_s_at | RAN     | RAN, member RAS oncogene family                        | AF054183  | 5901  | H |
| 201303_at   | EIF4A3  | eukaryotic translation initiation factor 4A, isoform 3 | NM_014740 | 9775  | H |
| 216841_s_at | SOD2    | superoxide dismutase 2, mitochondrial                  | X15132    | 6648  | H |
| 217755_at   | HN1     | hematological and neurological expressed 1             | AF060925  | 51155 | H |
| 209694_at   | PTS     | 6-pyruvoyltetrahydropterin synthase                    | M97655    | 5805  | H |
| 216243_s_at | IL1RN   | interleukin 1 receptor antagonist                      | BE563442  | 3557  | H |
| 203797_at   | VSNL1   | visinin-like 1                                         | AF039555  | 7447  | H |
| 204026_s_at | ZWINT   | ZW10 interactor                                        | NM_007057 | 11130 | H |
| 201912_s_at | GSPT1   | G1 to S phase transition 1                             | NM_002094 | 2935  | H |
| 203214_x_at | CDC2    | cell division cycle 2, G1 to S and G2 to M             | NM_001786 | 983   | H |

|             |           |                                                           |           |       |   |
|-------------|-----------|-----------------------------------------------------------|-----------|-------|---|
|             |           |                                                           |           |       |   |
| 204733_at   | KLK6      | kallikrein-related peptidase 6                            | NM_002774 | 5653  | H |
| 213797_at   | RSAD2     | radical S-adenosyl methionine domain containing 2         | AI337069  | 91543 | H |
|             |           |                                                           |           |       |   |
|             |           |                                                           |           |       |   |
|             |           |                                                           |           |       |   |
| 208727_s_at | CDC42     | cell division cycle 42 (GTP binding protein, 25kDa)       | BC003682  | 998   | H |
| 220230_s_at | CYB5R2    | cytochrome b5 reductase 2                                 | NM_016229 | 51700 | H |
| 219225_at   | PGBD5     | piggyBac transposable element derived 5                   | NM_024554 | 79605 | H |
| 207602_at   | TMPRSS11D | transmembrane protease, serine 11D                        | NM_004262 | 9407  | H |
| 212527_at   | D15Wsu75e | DNA segment, Chr 15, Wayne State University 75, expressed | BF057059  | 27351 | H |

|             |        |                                                                                 |           |       |   |
|-------------|--------|---------------------------------------------------------------------------------|-----------|-------|---|
| 203128_at   | SPTLC2 | serine palmitoyltransferase, long chain base subunit 2                          | NM_004863 | 9517  | H |
| 204580_at   | MMP12  | matrix metalloproteinase 12 (macrophage elastase)                               | NM_002426 | 4321  | H |
| 215977_x_at | GK     | glycerol kinase                                                                 | X68285    | 2710  | H |
| 217167_x_at | GK     | glycerol kinase                                                                 | AJ252550  | 2710  | H |
| 214088_s_at | FUT3   | fucosyltransferase 3 (galactoside 3(4)-L-fucosyltransferase, Lewis blood group) | AW080549  | 2525  | H |
| 205660_at   | OASL   | 2'-5'-oligoadenylate synthetase-like                                            | NM_003733 | 8638  | H |
| 210797_s_at | OASL   | 2'-5'-oligoadenylate synthetase-like                                            | AF063612  | 8638  | H |
| 219680_at   | NLRX1  | NLR family member X1                                                            | NM_024618 | 79671 | H |
| 218562_s_at | TMEM57 | transmembrane protein 57                                                        | NM_018202 | 55219 | H |
| 219395_at   | RBM35B | RNA binding motif protein 35B                                                   | NM_024939 | 80004 | H |
| 212141_at   | MCM4   | minichromosome maintenance complex component 4                                  | AA604621  | 4173  | H |
| 203616_at   | POLB   | polymerase (DNA directed), beta                                                 | NM_002690 | 5423  | H |
| 204268_at   | S100A2 | S100 calcium binding protein A2                                                 | NM_005978 | 6273  | H |
| 214599_at   | IVL    | involucrin                                                                      | NM_005547 | 3713  | H |
| 212432_at   | GRPEL1 | GrpE-like 1, mitochondrial (E. coli)                                            | AL542571  | 80273 | H |

|             |        |                                                                                    |           |       |   |
|-------------|--------|------------------------------------------------------------------------------------|-----------|-------|---|
| 216641_s_at | LAD1   | ladinin 1                                                                          | U58994    | 3898  | H |
| 213796_at   | SPRR1A | small proline-rich protein 1A                                                      | AI923984  | 6698  | H |
| 37152_at    | PPARD  | peroxisome proliferator-activated receptor delta                                   | L07592    | 5467  | H |
| 205194_at   | PSPH   | phosphoserine phosphatase                                                          | NM_004577 | 5723  | H |
| 213427_at   | RPP40  | ribonuclease P/MRP 40kDa subunit                                                   | NM_006638 | 10799 | H |
| 214549_x_at | SPRR1A | small proline-rich protein 1A                                                      | NM_005987 | 6698  | H |
| 218880_at   | FOSL2  | FOS-like antigen 2                                                                 | NM_024530 | 2355  | H |
| 210164_at   | GZMB   | granzyme B (granzyme 2, cytotoxic T-lymphocyte-associated serine esterase 1)       | J03189    | 3002  | H |
| 213137_s_at | PTPN2  | protein tyrosine phosphatase, non-receptor type 2                                  | AI828880  | 5771  | H |
| 210608_s_at | FUT2   | fucosyltransferase 2 (secretor status included)                                    | BC001899  | 2524  | H |
| 209714_s_at | CDKN3  | cyclin-dependent kinase inhibitor 3 (CDK2-associated dual specificity phosphatase) | AF213033  | 1033  | H |
| 209800_at   | KRT16  | keratin 16 (focal non-epidermolytic palmoplantar keratoderma)                      | AF061812  | 3868  | H |

|             |         |                                                                                  |           |       |   |
|-------------|---------|----------------------------------------------------------------------------------|-----------|-------|---|
| 203213_at   | CDC2    | cell division cycle 2, G1 to S and G2 to M                                       | AL524035  | 983   | H |
| 204331_s_at | MRPS12  | mitochondrial ribosomal protein S12                                              | AA587905  | 6183  | H |
| 209626_s_at | OSBPL3  | oxysterol binding protein-like 3                                                 | AY008372  | 26031 | H |
| 218384_at   | CARHSP1 | calcium regulated heat stable protein 1, 24kDa                                   | NM_014316 | 23589 | H |
| 204656_at   | SHB     | Src homology 2 domain containing adaptor protein B                               | AL138752  | 6461  | H |
| 215223_s_at | SOD2    | superoxide dismutase 2, mitochondrial                                            | W46388    | 6648  | H |
| 212729_at   | DLG3    | discs, large homolog 3 (neuroendocrine-dlg, Drosophila)                          | AI916274  | 1741  | H |
| 208992_s_at | STAT3   | signal transducer and activator of transcription 3 (acute-phase response factor) | BC000627  | 6774  | H |
| 217497_at   | ECGF1   | endothelial cell growth factor 1 (platelet-derived)                              | AW613387  | 1890  | H |
| 209126_x_at | KRT6B   | keratin 6B                                                                       | L42612    | 3854  | H |
| 218120_s_at | HMOX2   | heme oxygenase (decycling) 2                                                     | NM_002134 | 3163  | H |
| 203755_at   | BUB1B   | BUB1 budding uninhibited by benzimidazoles 1 homolog beta (yeast)                | NM_001211 | 701   | H |
| 206008_     | TGM1    | transglutaminase 1 (K polypeptide epidermal type I, protein-glutamine-gamma-     | NM_000    | 7051  | H |

|             |         |                                                      |           |       |   |
|-------------|---------|------------------------------------------------------|-----------|-------|---|
| at          |         | glutamyltransferase)                                 | 359       |       |   |
| 219978_s_at | NUSAP1  | nucleolar and spindle associated protein 1           | NM_018454 | 51203 | H |
| 202018_s_at | LTF     | lactotransferrin                                     | NM_002343 | 4057  | H |
| 202070_s_at | IDH3A   | isocitrate dehydrogenase 3 (NAD+) alpha              | NM_005530 | 3419  | H |
| 204601_at   | N4BP1   | Nedd4 binding protein 1                              | NM_014664 | 9683  | H |
| 204822_at   | TTK     | TTK protein kinase                                   | NM_003318 | 7272  | H |
| 205034_at   | CCNE2   | cyclin E2                                            | NM_004702 | 9134  | H |
| 205909_at   | POLE2   | polymerase (DNA directed), epsilon 2 (p59 subunit)   | NM_002692 | 5427  | H |
| 219037_at   | RRP15   | ribosomal RNA processing 15 homolog (S. cerevisiae)  | NM_016052 | 51018 | H |
| 201872_s_at | ABCE1   | ATP-binding cassette, sub-family E (OABP), member 1  | NM_002940 | 6059  | H |
| 219006_at   | C6orf66 | chromosome 6 open reading frame 66                   | NM_014165 | 29078 | H |
| 204244_s_at | DBF4    | DBF4 homolog (S. cerevisiae)                         | NM_006716 | 10926 | H |
| 221305_s_at | UGT1A8  | UDP glucuronosyltransferase 1 family, polypeptide A8 | NM_019076 | 54576 | H |



|             |         |                                                                                    |           |        |   |
|-------------|---------|------------------------------------------------------------------------------------|-----------|--------|---|
|             |         |                                                                                    |           |        |   |
| 214155_s_at | LARP4   | La ribonucleoprotein domain family, member 4                                       | AI743740  | 113251 | H |
| 217808_s_at | MAPKAP1 | mitogen-activated protein kinase associated protein 1                              | NM_024117 | 79109  | H |
| 200731_s_at | PTP4A1  | protein tyrosine phosphatase type IVA, member 1                                    | AW165960  | 7803   | H |
| 204109_s_at | NFYA    | nuclear transcription factor Y, alpha                                              | BF445142  | 4800   | H |
| 202589_at   | TYMS    | thymidylate synthetase                                                             | NM_001071 | 7298   | H |
| 206108_s_at | SFRS6   | splicing factor, arginine/serine-rich 6                                            | NM_006275 | 6431   | H |
| 212612_at   | RCOR1   | REST corepressor 1                                                                 | D31888    | 23186  | H |
| 216388_s_at | LTB4R   | leukotriene B4 receptor                                                            | U33448    | 1241   | H |
| 205895_s_at | NOLC1   | nucleolar and coiled-body phosphoprotein 1                                         | NM_004741 | 9221   | H |
| 206653_at   | POLR3G  | polymerase (RNA) III (DNA directed) polypeptide G (32kD)                           | BF062139  | 10622  | H |
| 203622_s_at | PNO1    | partner of NOB1 homolog (S. cerevisiae)                                            | NM_020143 | 56902  | H |
| 218360_at   | RAB22A  | RAB22A, member RAS oncogene family                                                 | NM_020673 | 57403  | H |
| 219959_at   | MOCOS   | molybdenum cofactor sulfurase                                                      | NM_017947 | 55034  | H |
| 218782_s_at | ATAD2   | ATPase family, AAA domain containing 2                                             | NM_014109 | 29028  | H |
| 219787_s_at | ECT2    | epithelial cell transforming sequence 2 oncogene                                   | NM_018098 | 1894   | H |
| 205419_at   | EBI2    | Epstein-Barr virus induced gene 2 (lymphocyte-specific G protein-coupled receptor) | NM_004951 | 1880   | H |

|             |         |                                                                               |           |      |   |
|-------------|---------|-------------------------------------------------------------------------------|-----------|------|---|
|             |         |                                                                               |           |      |   |
| 205891_at   | ADORA2B | adenosine A2b receptor                                                        | NM_000676 | 136  | H |
| 205287_s_at | TFAP2C  | transcription factor AP-2 gamma (activating enhancer binding protein 2 gamma) | NM_003222 | 7022 | H |
| 206932_at   | CH25H   | cholesterol 25-hydroxylase                                                    | NM_003956 | 9023 | H |
| 218881_s_at | FOSL2   | FOS-like antigen 2                                                            | NM_024530 | 2355 | H |
| 202431_s_at | MYC     | v-myc myelocytomatosis viral oncogene homolog (avian)                         | NM_002467 | 4609 | H |
| 206102_at   | GINS1   | GINS complex subunit 1 (Psf1 homolog)                                         | NM_021067 | 9837 | H |
| 210480_s_at | MYO6    | myosin VI                                                                     | U90236    | 4646 | H |
| 206667_s_at | SCAMP1  | secretory carrier membrane protein 1                                          | AF005037  | 9522 | H |

|             |          |                                                                                            |           |       |   |
|-------------|----------|--------------------------------------------------------------------------------------------|-----------|-------|---|
| 218748_s_at | EXOC5    | exocyst complex component 5                                                                | NM_006544 | 10640 | H |
| 201337_s_at | VAMP3    | vesicle-associated membrane protein 3 (cellubrevin)                                        | NM_004781 | 9341  | H |
| 218549_s_at | FAM82B   | family with sequence similarity 82, member B                                               | AK000672  | 51115 | H |
| 206134_at   | ADAMDEC1 | ADAM-like, decysin 1                                                                       | NM_014479 | 27299 | H |
| 201683_x_at | TOX4     | TOX high mobility group box family member 4                                                | BE783632  | 9878  | H |
| 214059_at   | IFI44    | interferon-induced protein 44                                                              | BE049439  | 10561 | H |
| 211090_s_at | PRPF4B   | PRP4 pre-mRNA processing factor 4 homolog B (yeast)                                        | Z25435    | 8899  | H |
| 201775_s_at | ATPAF1   | ATP synthase mitochondrial F1 complex assembly factor 1                                    | AA676790  | 64756 | H |
| 203087_s_at | KIF2A    | kinesin heavy chain member 2A                                                              | NM_004520 | 3796  | H |
| 213875_x_at | C6orf62  | chromosome 6 open reading frame 62                                                         | BG252842  | 81688 | H |
| 217777_s_at | PTPLAD1  | protein tyrosine phosphatase-like A domain containing 1                                    | NM_016395 | 51495 | H |
| 200604_s_at | PRKAR1A  | protein kinase, cAMP-dependent, regulatory, type I, alpha (tissue specific extinguisher 1) | M18468    | 5573  | H |
| 200729_s_at | ACTR2    | ARP2 actin-related protein 2 homolog (yeast)                                               | BE566290  | 10097 | H |
| 203007_x_at | LYPLA1   | lysophospholipase I                                                                        | AF077198  | 10434 | H |
| 208653_s_at | CD164    | CD164 molecule, sialomucin                                                                 | AF299343  | 8763  | H |
| 210915_x_at | TRBC1    | T cell receptor beta constant 1                                                            | M15564    | 28639 | H |
| 212588_at   | PTPRC    | protein tyrosine phosphatase, receptor type, C                                             | Y00062    | 5788  | H |

|             |              |                                                                                                      |               |           |   |
|-------------|--------------|------------------------------------------------------------------------------------------------------|---------------|-----------|---|
|             |              |                                                                                                      |               |           |   |
| 201299_s_at | MOBKL1<br>B  | MOB1, Mps One Binder kinase activator-like 1B (yeast)                                                | NM_018<br>221 | 5523<br>3 | H |
| 201399_s_at | TRAM1        | translocation associated membrane protein 1                                                          | BC0006<br>87  | 2347<br>1 | H |
| 200727_s_at | ACTR2        | ARP2 actin-related protein 2 homolog (yeast)                                                         | AA6995<br>83  | 1009<br>7 | H |
| 201295_s_at | WSB1         | WD repeat and SOCS box-containing 1                                                                  | BF1118<br>21  | 2611<br>8 | H |
| 220386_s_at | EML4         | echinoderm microtubule associated protein like 4                                                     | NM_019<br>063 | 2743<br>6 | H |
| 221081_s_at | DENND2<br>D  | DENN/MADD domain containing 2D                                                                       | NM_024<br>901 | 7996<br>1 | H |
| 219492_at   | CHIC2        | cysteine-rich hydrophobic domain 2                                                                   | NM_012<br>110 | 2651<br>1 | H |
| 220330_s_at | SAMSN1       | SAM domain, SH3 domain and nuclear localization signals 1                                            | NM_022<br>136 | 6409<br>2 | H |
| 214483_s_at | ARFIP1       | ADP-ribosylation factor interacting protein 1 (arfaptin 1)                                           | AF1244<br>89  | 2723<br>6 | H |
| 214786_at   | MAP3K1       | mitogen-activated protein kinase kinase kinase 1                                                     | AA3613<br>61  | 4214      | H |
| 212835_at   | KIAA015<br>7 | KIAA0157                                                                                             | AA7776<br>41  | 2317<br>2 | H |
| 213975_s_at | LYZ          | lysozyme (renal amyloidosis)                                                                         | AV7119<br>04  | 4069      | H |
| 212008_at   | UBXD2        | UBX domain containing 2                                                                              | N29889        | 2319<br>0 | H |
| 212409_s_at | TOR1AIP<br>1 | torsin A interacting protein 1                                                                       | AK0216<br>13  | 2609<br>2 | H |
| 210959_s_at | SRD5A1       | steroid-5-alpha-reductase, alpha polypeptide 1 (3-oxo-5 alpha-steroid delta 4-dehydrogenase alpha 1) | AF1131<br>28  | 6715      | H |

|             |         |                                                                                   |           |       |   |
|-------------|---------|-----------------------------------------------------------------------------------|-----------|-------|---|
|             |         |                                                                                   |           |       |   |
| 211559_s_at | CCNG2   | cyclin G2                                                                         | L49506    | 901   | H |
| 209284_s_at | C3orf63 | chromosome 3 open reading frame 63                                                | AI922509  | 23272 | H |
| 210148_at   | HIPK3   | homeodomain interacting protein kinase 3                                          | AF305239  | 10114 | H |
| 207339_s_at | LTB     | lymphotoxin beta (TNF superfamily, member 3)                                      | NM_002341 | 4050  | H |
| 207549_x_at | CD46    | CD46 molecule, complement regulatory protein                                      | NM_002389 | 4179  | H |
| 205836_s_at | YTHDC2  | YTH domain containing 2                                                           | NM_022828 | 64848 | H |
| 207238_s_at | PTPRC   | protein tyrosine phosphatase, receptor type, C                                    | NM_002838 | 5788  | H |
| 205269_at   | LCP2    | lymphocyte cytosolic protein 2 (SH2 domain containing leukocyte protein of 76kDa) | AI123251  | 3937  | H |
| 205732_s_at | NCOA2   | nuclear receptor coactivator 2                                                    | NM_006540 | 10499 | H |
| 204174_at   | ALOX5AP | arachidonate 5-lipoxygenase-activating protein                                    | NM_001629 | 241   | H |
| 204716_at   | CCDC6   | coiled-coil domain containing 6                                                   | NM_005436 | 8030  | H |
| 204007_at   | FCGR3B  | Fc fragment of IgG, low affinity IIIb, receptor (CD16b)                           | J04162    | 2215  | H |

|             |        |                                                         |           |       |   |
|-------------|--------|---------------------------------------------------------|-----------|-------|---|
| 204057_at   | IRF8   | interferon regulatory factor 8                          | AI073984  | 3394  | H |
| 203553_s_at | MAP4K5 | mitogen-activated protein kinase kinase kinase kinase 5 | NM_006575 | 11183 | H |
| 203915_at   | CXCL9  | chemokine (C-X-C motif) ligand 9                        | NM_002416 | 4283  | H |
| 202647_s_at | NRAS   | neuroblastoma RAS viral (v-ras) oncogene homolog        | NM_002524 | 4893  | H |

|             |          |                                                                                   |           |       |   |
|-------------|----------|-----------------------------------------------------------------------------------|-----------|-------|---|
|             |          |                                                                                   |           |       |   |
| 203416_at   | CD53     | CD53 molecule                                                                     | NM_000560 | 963   | H |
| 201856_s_at | ZFR      | zinc finger RNA binding protein                                                   | BC000376  | 51663 | H |
| 202516_s_at | DLG1     | discs, large homolog 1 (Drosophila)                                               | NM_004087 | 1739  | H |
| 217496_s_at | IDE      | insulin-degrading enzyme                                                          | AA918442  | 3416  | H |
| 217521_at   |          |                                                                                   | N54942    |       |   |
| 211574_s_at | CD46     | CD46 molecule, complement regulatory protein                                      | D84105    | 4179  | H |
| 212720_at   | PAPOLA   | poly(A) polymerase alpha                                                          | AI670847  | 10914 | H |
| 209629_s_at | NXT2     | nuclear transport factor 2-like export factor 2                                   | AK023289  | 55916 | H |
| 211547_s_at | PAFAH1B1 | platelet-activating factor acetylhydrolase, isoform Ib, alpha subunit 45kDa       | L13387    | 5048  | H |
| 204393_s_at | ACPP     | acid phosphatase, prostate                                                        | NM_001099 | 55    | H |
| 205159_at   | CSF2RB   | colony stimulating factor 2 receptor, beta, low-affinity (granulocyte-macrophage) | AV756141  | 1439  | H |
| 211668_s_at | PLAU     | plasminogen activator, urokinase                                                  | K03226    | 5328  | H |

|             |          |                                                                                     |           |       |   |
|-------------|----------|-------------------------------------------------------------------------------------|-----------|-------|---|
| 213470_s_at | HNRPH1   | heterogeneous nuclear ribonucleoprotein H1 (H)                                      | BF983406  | 3187  | H |
| 205401_at   | AGPS     | alkylglycerone phosphate synthase                                                   | NM_003659 | 8540  | H |
| 210154_at   | ME2      | malic enzyme 2, NAD(+)-dependent, mitochondrial                                     | M55905    | 4200  | H |
| 202654_x_at | 7-Mar    | membrane-associated ring finger (C3HC4) 7                                           | NM_022826 | 64844 | H |
| 202479_s_at | TRIB2    | tribbles homolog 2 (Drosophila)                                                     | BC002637  | 28951 | H |
| 218465_at   | TMEM33   | transmembrane protein 33                                                            | NM_018126 | 55161 | H |
| 219017_at   | ETNK1    | ethanolamine kinase 1                                                               | NM_018638 | 55500 | H |
| 203123_s_at | SLC11A2  | solute carrier family 11 (proton-coupled divalent metal ion transporters), member 2 | AU154469  | 4891  | H |
| 205170_at   | STAT2    | signal transducer and activator of transcription 2, 113kDa                          | NM_005419 | 6773  | H |
| 202089_s_at | SLC39A6  | solute carrier family 39 (zinc transporter), member 6                               | NM_012319 | 25800 | H |
| 213292_s_at | SNX13    | sorting nexin 13                                                                    | AA908770  | 23161 | H |
| 209723_at   | SERPINB9 | serpin peptidase inhibitor, clade B (ovalbumin), member 9                           | BC002538  | 5272  | H |
| 203535_at   | S100A9   | S100 calcium binding protein A9                                                     | NM_002965 | 6280  | H |
| 201571_s_at | DCTD     | dCMP deaminase                                                                      | AI656493  | 1635  | H |
| 202918_s_at | MOBKL3   | MOB1, Mps One Binder kinase activator-like 3 (yeast)                                | AF151853  | 25843 | H |
| 219850_s_at | EHF      | ets homologous factor                                                               | AF203977  | 26298 | H |
| 201298_s_at | MOBKL1B  | MOB1, Mps One Binder kinase activator-like 1B (yeast)                               | BC003398  | 55233 | H |
| 201504_at   | TSN      | translin                                                                            | AI43530   | 7247  | H |



|             |         |                                                      |           |       |   |
|-------------|---------|------------------------------------------------------|-----------|-------|---|
| s_at        |         |                                                      | 2         |       |   |
| 211801_x_at | MFN1    | mitofusin 1                                          | AF329637  | 55669 | H |
| 205543_at   | HSPA4L  | heat shock 70kDa protein 4-like                      | NM_014278 | 22824 | H |
| 206094_x_at | UGT1A6  | UDP glucuronosyltransferase 1 family, polypeptide A6 | NM_001072 | 54578 | H |
| 218884_s_at | GUF1    | GUF1 GTPase homolog ( <i>S. cerevisiae</i> )         | AK025248  | 60558 | H |
| 213872_at   | C6orf62 | chromosome 6 open reading frame 62                   | BE465032  | 81688 | H |
| 217821_s_at | WBP11   | WW domain binding protein 11                         | NM_016312 | 51729 | H |
| 204941_s_at | ALDH3B2 | aldehyde dehydrogenase 3 family, member B2           | AA071510  | 222   | H |
| 209000_s_at | 8-Sep   | septin 8                                             | BC001329  | 23176 | H |
| 203265_s_at | MAP2K4  | mitogen-activated protein kinase kinase 4            | NM_003010 | 6416  | H |

|             |           |                                                                      |           |       |   |
|-------------|-----------|----------------------------------------------------------------------|-----------|-------|---|
|             |           |                                                                      |           |       |   |
| 210052_s_at | TPX2      | TPX2, microtubule-associated, homolog ( <i>Xenopus laevis</i> )      | AF098158  | 22974 | H |
| 201259_s_at | SYPL1     | synaptophysin-like 1                                                 | AI768845  | 6856  | H |
| 202874_s_at | ATP6V1C1  | ATPase, H <sup>+</sup> transporting, lysosomal 42kDa, V1 subunit C1  | NM_001695 | 528   | H |
| 205916_at   | S100A7    | S100 calcium binding protein A7                                      | NM_002963 | 6278  | H |
| 208097_s_at | TXNDC1    | thioredoxin domain containing 1                                      | NM_030755 | 81542 | H |
| 221497_x_at | EGLN1     | egl nine homolog 1 ( <i>C. elegans</i> )                             | BC005369  | 54583 | H |
| 212763_at   | CAMSAP1L1 | calmodulin regulated spectrin-associated protein 1-like 1            | AW593213  | 23271 | H |
| 215150_at   | YOD1      | YOD1 OTU deubiquinating enzyme 1 homolog ( <i>S. cerevisiae</i> )    | AF090896  | 55432 | H |
| 216652_s_at | DR1       | down-regulator of transcription 1, TBP-binding (negative cofactor 2) | AL137673  | 1810  | H |
| 221220_s_at | SCYL2     | SCY1-like 2 ( <i>S. cerevisiae</i> )                                 | NM_017988 | 55681 | H |
| 208596_s_at | UGT1A3    | UDP glucuronosyltransferase 1 family, polypeptide A3                 | NM_019093 | 54659 | H |

|             |        |                                                         |           |       |   |
|-------------|--------|---------------------------------------------------------|-----------|-------|---|
|             |        |                                                         |           |       |   |
| 212194_s_at | TM9SF4 | transmembrane 9 superfamily protein member 4            | AI418892  | 9777  | H |
| 220775_s_at | UEVLD  | UEV and lactate/malate dehydrogenase domains            | NM_018314 | 55293 | H |
| 202166_s_at | PPP1R2 | protein phosphatase 1, regulatory (inhibitor) subunit 2 | NM_006241 | 5504  | H |
| 218340_s_at | UBE1L2 | ubiquitin-activating enzyme E1-like 2                   | NM_018227 | 55236 | H |
| 210285_x_at | WTAP   | Wilms tumor 1 associated protein                        | BC000383  | 9589  | H |
|             |        |                                                         |           |       |   |
| 201130_s_at | CDH1   | cadherin 1, type 1, E-cadherin (epithelial)             | NM_004360 | 999   | H |
| 208853_s_at | CANX   | calnexin                                                | L18887    | 821   | H |
| 215236_s_at | PICALM | phosphatidylinositol binding clathrin assembly protein  | AV721177  | 8301  | H |
| 217301_x_at | RBBP4  | retinoblastoma binding protein 4                        | X71810    | 5928  | H |

|             |         |                                                  |           |      |   |
|-------------|---------|--------------------------------------------------|-----------|------|---|
|             |         |                                                  |           |      |   |
| 216205_s_at | MFN2    | mitofusin 2                                      | AK021947  | 9927 | H |
| 216689_x_at | ARHGAP1 | Rho GTPase activating protein 1                  | U62794    | 392  | H |
| 206429_at   | F2RL1   | coagulation factor II (thrombin) receptor-like 1 | NM_005242 | 2150 | H |
|             |         |                                                  |           |      |   |
| 208351_s_at | MAPK1   | mitogen-activated protein kinase 1               | NM_002745 | 5594 | H |

|             |         |                                                                                       |           |       |   |
|-------------|---------|---------------------------------------------------------------------------------------|-----------|-------|---|
|             |         |                                                                                       |           |       |   |
| 211194_s_at | TP63    | tumor protein p63                                                                     | AB010153  | 8626  | H |
| 211195_s_at | TP63    | tumor protein p63                                                                     | AF116771  | 8626  | H |
| 212568_s_at | DLAT    | dihydrolipoamide S-acetyltransferase (E2 component of pyruvate dehydrogenase complex) | BF978872  | 1737  | H |
| 214553_s_at | ARPP-19 | cyclic AMP phosphoprotein, 19 kD                                                      | NM_006628 | 10776 | H |
| 202816_s_at | SS18    | synovial sarcoma translocation, chromosome 18                                         | AW292882  | 6760  | H |
| 211536_x_at | MAP3K7  | mitogen-activated protein kinase kinase kinase 7                                      | AB009358  | 6885  | H |
| 202199_s_at | SRPK1   | SFRS protein kinase 1                                                                 | AW082913  | 6732  | H |

|             |        |                                                                                          |           |       |   |
|-------------|--------|------------------------------------------------------------------------------------------|-----------|-------|---|
|             |        |                                                                                          |           |       |   |
| 202543_s_at | GMFB   | glia maturation factor, beta                                                             | BC005359  | 2764  | H |
| 202917_s_at | S100A8 | S100 calcium binding protein A8                                                          | NM_002964 | 6279  | H |
| 204426_at   | TMED2  | transmembrane emp24 domain trafficking protein 2                                         | NM_006815 | 10959 | H |
| 201688_s_at | TPD52  | tumor protein D52                                                                        | BG389015  | 7163  | H |
| 201992_s_at | KIF5B  | kinesin family member 5B                                                                 | NM_004521 | 3799  | H |
| 201211_s_at | DDX3X  | DEAD (Asp-Glu-Ala-Asp) box polypeptide 3, X-linked                                       | NM_001356 | 1654  | H |
| 201485_s_at | RCN2   | reticulocalbin 2, EF-hand calcium binding domain                                         | BC004892  | 5955  | H |
| 200890_s_at | SSR1   | signal sequence receptor, alpha (translocon-associated protein alpha)                    | NM_003144 | 6745  | H |
| 200892_s_at | SFRS10 | splicing factor, arginine/serine-rich 10 (transformer 2 homolog, Drosophila)             | BC000451  | 6434  | H |
| 220800_s_at | TMOD3  | tropomodulin 3 (ubiquitous)                                                              | NM_014547 | 29766 | H |
| 200607_s_at | RAD21  | RAD21 homolog (S. pombe)                                                                 | BG289967  | 5885  | H |
| 200641_s_at | YWHAZ  | tyrosine 3-monooxygenase/tryptophan 5-monooxygenase activation protein, zeta polypeptide | BC003623  | 7534  | H |
| 218036_x_at | NMD3   | NMD3 homolog (S. cerevisiae)                                                             | AL520719  | 51068 | H |
| 218474_s_at | KCTD5  | potassium channel tetramerisation domain containing 5                                    | NM_018992 | 54442 | H |
| 213548_s_at | CDV3   | CDV3 homolog (mouse)                                                                     | BG257762  | 55573 | H |
| 215125_s_at | UGT1A6 | UDP glucuronosyltransferase 1 family, polypeptide A6                                     | AV691323  | 54578 | H |

|             |         |                                                                                                                     |           |       |   |
|-------------|---------|---------------------------------------------------------------------------------------------------------------------|-----------|-------|---|
|             |         |                                                                                                                     |           |       |   |
| 212514_x_at | DDX3X   | DEAD (Asp-Glu-Ala-Asp) box polypeptide 3, X-linked                                                                  | R60068    | 1654  | H |
| 212800_at   | STX6    | syntaxin 6                                                                                                          | AI740832  | 10228 | H |
| 210716_s_at | CLIP1   | CAP-GLY domain containing linker protein 1                                                                          | M97501    | 6249  | H |
| 212107_s_at | DHX9    | DEAH (Asp-Glu-Ala-His) box polypeptide 9                                                                            | BE561014  | 1660  | H |
| 208750_s_at | ARF1    | ADP-ribosylation factor 1                                                                                           | AF052179  | 375   | H |
| 208867_s_at | CSNK1A1 | casein kinase 1, alpha 1                                                                                            | AF119911  | 1452  | H |
| 201768_s_at | CLINT1  | clathrin interactor 1                                                                                               | BC004467  | 9685  | H |
| 202129_s_at | RIOK3   | RIO kinase 3 (yeast)                                                                                                | AW006290  | 8780  | H |
| 200722_s_at | CAPRIN1 | cell cycle associated protein 1                                                                                     | BG258784  | 4076  | H |
| 201742_x_at | SFRS1   | splicing factor, arginine/serine-rich 1 (splicing factor 2, alternate splicing factor)                              | M69040    | 6426  | H |
| 214007_s_at | TWF1    | twinfilin, actin-binding protein, homolog 1 (Drosophila)                                                            | AW665024  | 5756  | H |
| 215707_s_at | PRNP    | prion protein (p27-30) (Creutzfeldt-Jakob disease, Gerstmann-Strausler-Scheinker syndrome, fatal familial insomnia) | AV725328  | 5621  | H |
| 204427_s_at | TMED2   | transmembrane emp24 domain trafficking protein 2                                                                    | NM_006815 | 10959 | H |

|             |        |                                                                        |           |       |   |
|-------------|--------|------------------------------------------------------------------------|-----------|-------|---|
| 206383_s_at | G3BP2  | GTPase activating protein (SH3 domain) binding protein 2               | NM_012297 | 9908  | H |
| 202270_at   | GBP1   | guanylate binding protein 1, interferon-inducible, 67kDa               | NM_002053 | 2633  | H |
| 202583_s_at | RANBP9 | RAN binding protein 9                                                  | NM_005493 | 10048 | H |
| 219399_at   | LIN7C  | lin-7 homolog C (C. elegans)                                           | NM_018362 | 55327 | H |
| 221770_at   | RPE    | ribulose-5-phosphate-3-epimerase                                       | BE964473  | 6120  | H |
| 208840_s_at | G3BP2  | GTPase activating protein (SH3 domain) binding protein 2               | AB014560  | 9908  | H |
| 209895_at   | PTPN11 | protein tyrosine phosphatase, non-receptor type 11 (Noonan syndrome 1) | AF119855  | 5781  | H |
| 213461_at   | NUDT21 | nudix (nucleoside diphosphate linked moiety X)-type motif 21           | AI800983  | 11051 | H |
| 214975_s_at | MTMR1  | myotubularin related protein 1                                         | AK001816  | 8776  | H |



|             |        |                                                      |           |      |   |
|-------------|--------|------------------------------------------------------|-----------|------|---|
|             |        |                                                      |           |      |   |
| 215177_s_at | ITGA6  | integrin, alpha 6                                    | AV733308  | 3655 | H |
| 204533_at   | CXCL10 | chemokine (C-X-C motif) ligand 10                    | NM_001565 | 3627 | H |
| 205763_s_at | DDX18  | DEAD (Asp-Glu-Ala-Asp) box polypeptide 18            | NM_006773 | 8886 | H |
| 200769_s_at | MAT2A  | methionine adenosyltransferase II, alpha             | BC001686  | 4144 | H |
| 201169_s_at | BHLHB2 | basic helix-loop-helix domain containing, class B, 2 | BG326045  | 8553 | H |

**GENES UP-REGULATED BY ETANERCEPT IN RESPONDERS**

|                |                                                                     |
|----------------|---------------------------------------------------------------------|
| <b>R_1vs0</b>  | Log2 Fold change between Wk1 vs Wk0 in Responders                   |
| <b>R_2vs0</b>  | Log2 Fold change between Wk2 vs Wk0 in Responders                   |
| <b>R_4vs0</b>  | Log2 Fold change between Wk4 vs Wk0 in Responders                   |
| <b>R_12vs0</b> | Log2 Fold change between Wk12 vs Wk0 in Responders                  |
| <b>R_NL</b>    | Mean expression value estimate (Log2) for Responders in NL skin     |
| <b>R_0</b>     | Mean expression value estimate (Log2) for Responders in LS skin     |
| <b>R_1</b>     | Mean expression value estimate (Log2) for Responders in LS at Wk 1  |
| <b>R_2</b>     | Mean expression value estimate (Log2) for Responders in LS at Wk 2  |
| <b>R_4</b>     | Mean expression value estimate (Log2) for Responders in LS at Wk 4  |
| <b>R_12</b>    | Mean expression value estimate (Log2) for Responders in LS at Wk 12 |
| <b>Cluster</b> | Final cluster membership                                            |

| Probe       | Symbol   | Description                                 | Gene   |
|-------------|----------|---------------------------------------------|--------|
| 205969_at   | AADAC    | arylacetamide deacetylase (esterase)        | NM_086 |
| 209686_at   | S100B    | S100 calcium binding protein B              | BC066  |
| 221019_s_at | COLEC12  | collectin sub-family member 12              | NM_781 |
| 218858_at   | DEPDC6   | DEP domain containing 6                     | NM_783 |
| 205987_at   | CD1C     | CD1c molecule                               | NM_765 |
| 201417_at   | SOX4     | SRY (sex determining region Y)-box 4        | AL179  |
| 203910_at   | ARHGAP29 | Rho GTPase activating protein 29            | NM_815 |
| 204112_s_at | HNMT     | histamine N-methyltransferase               | NM_895 |
| 213566_at   | RNASE6   | ribonuclease, RNase A family, k6            | NM_615 |
| 211712_s_at | ANXA9    | annexin A9                                  | BC030  |
| 213456_at   | SOSTDC1  | sclerostin domain containing 1              | AI920  |
| 211548_     | HPGD     | hydroxyprostaglandin dehydrogenase 15-(NAD) | J055   |

|             |         |                                                                           |        |
|-------------|---------|---------------------------------------------------------------------------|--------|
| s_at        |         |                                                                           |        |
| 215784_at   | CD1E    | CD1e molecule                                                             | AA311  |
| 203914_x_at | HPGD    | hydroxyprostaglandin dehydrogenase 15-(NAD)                               | NM_860 |
| 217889_s_at | CYBRD1  | cytochrome b reductase 1                                                  | AL193  |
| 203300_x_at | AP1S2   | adaptor-related protein complex 1, sigma 2 subunit                        | NM_916 |
| 207173_x_at | CDH11   | cadherin 11, type 2, OB-cadherin (osteoblast)                             | D21    |
| 212385_at   | TCF4    | transcription factor 4                                                    | AU126  |
| 214830_at   | SLC38A6 | solute carrier family 38, member 6                                        | AI530  |
| 207172_s_at | CDH11   | cadherin 11, type 2, OB-cadherin (osteoblast)                             | D21    |
| 210875_s_at | ZEB1    | zinc finger E-box binding homeobox 1                                      | U12    |
| 212956_at   | TBC1D9  | TBC1 domain family, member 9 (with GRAM domain)                           | AI344  |
| 213415_at   | CLIC2   | chloride intracellular channel 2                                          | AI768  |
| 207265_s_at | KDELR3  | KDEL (Lys-Asp-Glu-Leu) endoplasmic reticulum protein retention receptor 3 | NM_657 |
| 210261_at   | KCNK2   | potassium channel, subfamily K, member 2                                  | AF011  |
| 202311_s_at | COL1A1  | collagen, type I, alpha 1                                                 | AI741  |

|             |          |                                                                                                                          |        |
|-------------|----------|--------------------------------------------------------------------------------------------------------------------------|--------|
|             |          |                                                                                                                          |        |
| 203325_s_at | COL5A1   | collagen, type V, alpha 1                                                                                                | AI139  |
| 214163_at   | C1orf41  | chromosome 1 open reading frame 41                                                                                       | AV796  |
| 207496_at   | MS4A2    | membrane-spanning 4-domains, subfamily A, member 2 (Fc fragment of IgE, high affinity I, receptor for; beta polypeptide) | NM_139 |
| 213959_s_at | RPGRIP1L | RPGRIP1-like                                                                                                             | BF597  |
| 202319_at   | SENP6    | SUMO1/sentrin specific peptidase 6                                                                                       | NM_571 |
| 209012_at   | TRIO     | triple functional domain (PTPRF interacting)                                                                             | AV792  |
| 221730_at   | COL5A2   | collagen, type V, alpha 2                                                                                                | AL535  |
| 202664_at   | WIPF1    | WAS/WASL interacting protein family, member 1                                                                            | AWC22  |
| 204114_at   | NID2     | nidogen 2 (osteonidogen)                                                                                                 | NM_361 |
| 212489_at   | COL5A1   | collagen, type V, alpha 1                                                                                                | AI988  |
| 221729_at   | COL5A2   | collagen, type V, alpha 2                                                                                                | AL535  |
| 215446_s_at | LOX      | lysyl oxidase                                                                                                            | L168   |
| 218006_s_at | ZNF22    | zinc finger protein 22 (KOX 15)                                                                                          | AA771  |
| 203988_s_at | FUT8     | fucosyltransferase 8 (alpha (1,6) fucosyltransferase)                                                                    | NM_480 |

|             |          |                                                                                           |        |
|-------------|----------|-------------------------------------------------------------------------------------------|--------|
|             |          |                                                                                           |        |
| 213304_at   | KIAA0423 | KIAA0423                                                                                  | AI822  |
| 209568_s_at | RGL1     | ral guanine nucleotide dissociation stimulator-like 1                                     | AF179  |
| 211734_s_at | FCER1A   | Fc fragment of IgE, high affinity I, receptor for; alpha polypeptide                      | BC012  |
| 215536_at   | HLA-DQB2 | major histocompatibility complex, class II, DQ beta 2                                     | X873   |
| 203485_at   | RTN1     | reticulon 1                                                                               | NM_136 |
| 210325_at   | CD1A     | CD1a molecule                                                                             | M28    |
| 218633_x_at | ABHD10   | abhydrolase domain containing 10                                                          | NM_394 |
| 220124_at   | GAN      | giant axonal neuropathy (gigaxonin)                                                       | NM_041 |
| 209485_s_at | OSBPL1A  | oxysterol binding protein-like 1A                                                         | AF214  |
| 213186_at   | DZIP3    | zinc finger DAZ interacting protein 3                                                     | BG505  |
| 218901_at   | PLSCR4   | phospholipid scramblase 4                                                                 | NM_353 |
| 201990_s_at | CREBL2   | cAMP responsive element binding protein-like 2                                            | NM_310 |
| 206637_at   | P2RY14   | purinergic receptor P2Y, G-protein coupled, 14                                            | NM_879 |
| 218005_at   | ZNF22    | zinc finger protein 22 (KOX 15)                                                           | AA771  |
| 210198_s_at | PLP1     | proteolipid protein 1 (Pelizaeus-Merzbacher disease, spastic paraplegia 2, uncomplicated) | BC065  |
| 212798_s_at | ANKMY2   | ankyrin repeat and MYND domain containing 2                                               | AK089  |
| 203680_at   | PRKAR2B  | protein kinase, cAMP-dependent, regulatory, type II, beta                                 | NM_736 |
| 204290_s_at | ALDH6A1  | aldehyde dehydrogenase 6 family, member A1                                                | NM_589 |

|             |         |                                                                                                   |        |
|-------------|---------|---------------------------------------------------------------------------------------------------|--------|
|             |         |                                                                                                   |        |
| 220428_at   | CD207   | CD207 molecule, langerin                                                                          | NM_717 |
| 201116_s_at | CPE     | carboxypeptidase E                                                                                | NM_873 |
| 203575_at   | CSNK2A2 | casein kinase 2, alpha prime polypeptide                                                          | NM_896 |
| 203758_at   | CTSO    | cathepsin O                                                                                       | AV784  |
| 203185_at   | RASSF2  | Ras association (RalGDS/AF-6) domain family 2                                                     | NM_737 |
| 210757_x_at | DAB2    | disabled homolog 2, mitogen-responsive phosphoprotein (Drosophila)                                | AF198  |
| 207719_x_at | CEP170  | centrosomal protein 170kDa                                                                        | NM_812 |
| 210658_s_at | GGA2    | golgi associated, gamma adaptin ear containing, ARF binding protein 2                             | BC084  |
| 36829_at    | PER1    | period homolog 1 (Drosophila)                                                                     | AF091  |
| 215294_s_at | SMARCA1 | SWI/SNF related, matrix associated, actin dependent regulator of chromatin, subfamily a, member 1 | AK026  |
| 204749_at   | NAP1L3  | nucleosome assembly protein 1-like 3                                                              | NM_538 |
| 205139_s_at | UST     | uronyl-2-sulfotransferase                                                                         | NM_715 |
| 212667_at   | SPARC   | secreted protein, acidic, cysteine-rich (osteonectin)                                             | AL522  |
| 212713_at   | MFAP4   | microfibrillar-associated protein 4                                                               | R72    |
| 212327_at   | LIMCH1  | LIM and calponin homology domains 1                                                               | AK015  |
| 212387_at   | TCF4    | transcription factor 4                                                                            | BG471  |

|             |         |                                               |        |
|-------------|---------|-----------------------------------------------|--------|
| 221249_s_at | FAM117A | family with sequence similarity 117, member A | NM_802 |
| 221272_s_at | C1orf21 | chromosome 1 open reading frame 21            | NM_806 |
| 203146_s_at | GABBR1  | gamma-aminobutyric acid (GABA) B receptor, 1  | NM_470 |
| 203498_at   | RCAN2   | regulator of calcineurin 2                    | NM_822 |
| 210495_x_at | FN1     | fibronectin 1                                 | AF195  |
| 210517_s_at | AKAP12  | A kinase (PRKA) anchor protein (gravin) 12    | AB076  |
| 209897_s_at | SLIT2   | slit homolog 2 (Drosophila)                   | AF085  |
| 210135_s_at | SHOX2   | short stature homeobox 2                      | AF054  |
| 208609_s_at | TNXB    | tenascin XB                                   | NM_105 |
| 208741_at   | SAP18   | Sin3A-associated protein, 18kDa               | AW256  |
| 206030_at   | ASPA    | aspartoacylase (Canavan disease)              | NM_049 |
| 207996_s_at | C18orf1 | chromosome 18 open reading frame 1            | NM_338 |
| 205399_at   | DCLK1   | doublecortin-like kinase 1                    | NM_734 |

|             |         |                                                                               |        |
|-------------|---------|-------------------------------------------------------------------------------|--------|
| 205529_s_at | RUNX1T1 | runt-related transcription factor 1; translocated to, 1 (cyclin D-related)    | NM_349 |
| 204719_at   | ABCA8   | ATP-binding cassette, sub-family A (ABC1), member 8                           | NM_168 |
| 204834_at   | FGL2    | fibrinogen-like 2                                                             | NM_682 |
| 203404_at   | ARMCX2  | armadillo repeat containing, X-linked 2                                       | NM_782 |
| 203417_at   | MFAP2   | microfibrillar-associated protein 2                                           | NM_459 |
| 203296_s_at | ATP1A2  | ATPase, Na <sup>+</sup> /K <sup>+</sup> transporting, alpha 2 (+) polypeptide | NM_702 |
| 203329_at   | PTPRM   | protein tyrosine phosphatase, receptor type, M                                | NM_845 |
| 202202_s_at | LAMA4   | laminin, alpha 4                                                              | NM_290 |
| 202242_at   | TSPAN7  | tetraspanin 7                                                                 | NM_615 |
| 218918_at   | MAN1C1  | mannosidase, alpha, class 1C, member 1                                        | NM_379 |
| 43427_at    | ACACB   | acetyl-Coenzyme A carboxylase beta                                            | AI978  |



|             |           |                                                                                                  |        |
|-------------|-----------|--------------------------------------------------------------------------------------------------|--------|
| 205381_at   | LRRC17    | leucine rich repeat containing 17                                                                | NM_824 |
| 205518_s_at | CMAH      | cytidine monophosphate-N-acetylneuraminic acid hydroxylase (CMP-N-acetylneuramate monooxygenase) | NM_570 |
| 205226_at   | PDGFRL    | platelet-derived growth factor receptor-like                                                     | NM_207 |
| 205908_s_at | OMD       | osteomodulin                                                                                     | NM_014 |
| 207092_at   | LEP       | leptin (obesity homolog, mouse)                                                                  | NM_230 |
| 207233_s_at | MITF      | microphthalmia-associated transcription factor                                                   | NM_248 |
| 203494_s_at | CEP57     | centrosomal protein 57kDa                                                                        | NM_679 |
| 203571_s_at | C10orf116 | chromosome 10 open reading frame 116                                                             | BC071  |
| 200795_at   | SPARCL1   | SPARC-like 1 (mast9, hevin)                                                                      | NM_684 |
| 200885_at   | PPM1J     | protein phosphatase 1J (PP2C domain containing)                                                  | NM_167 |
| 203817_at   | GUCY1B3   | guanylate cyclase 1, soluble, beta 3                                                             | W93    |
| 209070_s_at | RGS5      | regulator of G-protein signaling 5                                                               | AI187  |
| 203088_at   | FBLN5     | fibulin 5                                                                                        | NM_329 |
| 203799_at   | CD302     | CD302 molecule                                                                                   | NM_880 |
| 221825_at   | ANGEL2    | angel homolog 2 (Drosophila)                                                                     | BE641  |
| 221834_at   | LONP2     | lon peptidase 2, peroxisomal                                                                     | AV732  |
| 218309_at   | CAMK2N1   | calcium/calmodulin-dependent protein kinase II inhibitor 1                                       | NM_584 |
| 218353_at   | RGS5      | regulator of G-protein signaling 5                                                               | NM_226 |
| 213496_at   | LPPR4     | plasticity related gene 1                                                                        | AW5    |

|             |        |                                                                                |       |
|-------------|--------|--------------------------------------------------------------------------------|-------|
| at          |        |                                                                                | 63    |
| 214012_at   | ARTS-1 | type 1 tumor necrosis factor receptor shedding aminopeptidase regulator        | BE538 |
| 213033_s_at | NFIB   | nuclear factor I/B                                                             | A189  |
| 213050_at   | COBL   | cordon-bleu homolog (mouse)                                                    | AA537 |
| 210664_s_at | TFPI   | tissue factor pathway inhibitor (lipoprotein-associated coagulation inhibitor) | AF034 |
| 210986_s_at | TPM1   | tropomyosin 1 (alpha)                                                          | Z247  |
| 217757_at   | A2M    | alpha-2-macroglobulin                                                          | NM014 |
| 217867_x_at | BACE2  | beta-site APP-cleaving enzyme 2                                                | AF132 |
| 214475_x_at | CAPN3  | calpain 3, (p94)                                                               | AF164 |
| 201539_s_at | FHL1   | four and a half LIM domains 1                                                  | U29   |
| 37462_i_at  | SF3A2  | splicing factor 3a, subunit 2, 66kDa                                           | L219  |
| 204894_s_at | AOC3   | amine oxidase, copper containing 3 (vascular adhesion protein 1)               | AF006 |

|             |           |                                                                        |        |
|-------------|-----------|------------------------------------------------------------------------|--------|
|             |           |                                                                        |        |
| 204940_at   | PLN       | phospholamban                                                          | NM_667 |
| 212677_s_at | CEP68     | centrosomal protein 68kDa                                              | BG5_81 |
| 212695_at   | CRY2      | cryptochrome 2 (photolyase-like)                                       | AB0_58 |
| 210230_at   | LOC728965 | hypothetical protein LOC728965                                         | BC0_29 |
| 210469_at   | DLG5      | discs, large homolog 5 (Drosophila)                                    | BC0_15 |
| 204468_s_at | TIE1      | tyrosine kinase with immunoglobulin-like and EGF-like domains 1        | NM_424 |
| 204482_at   | CLDN5     | claudin 5 (transmembrane protein deleted in velocardiofacial syndrome) | NM_277 |
| 202861_at   | PER1      | period homolog 1 (Drosophila)                                          | NM_616 |
| 202920_at   | ANK2      | ankyrin 2, neuronal                                                    | NM_148 |
| 209169_at   | GPM6B     | glycoprotein M6B                                                       | N63    |
| 209184_s_at | IRS2      | insulin receptor substrate 2                                           | AF0_10 |
| 209156_s_at | COL6A2    | collagen, type VI, alpha 2                                             | AY0_08 |

|             |         |                                                                       |       |
|-------------|---------|-----------------------------------------------------------------------|-------|
| 209167_at   | GPM6B   | glycoprotein M6B                                                      | AI410 |
| 209071_s_at | RGS5    | regulator of G-protein signaling 5                                    | AF170 |
| 209074_s_at | FAM107A | family with sequence similarity 107, member A                         | AF053 |
| 209005_at   | FBXL5   | F-box and leucine-rich repeat protein 5                               | AF123 |
| 209047_at   | AQP1    | aquaporin 1 (Colton blood group)                                      | AL591 |
| 208981_at   | PECAM1  | platelet/endothelial cell adhesion molecule (CD31 antigen)            | AA701 |
| 208982_at   | PECAM1  | platelet/endothelial cell adhesion molecule (CD31 antigen)            | M37   |
| 208963_x_at | FADS1   | fatty acid desaturase 1                                               | AL560 |
| 208978_at   | CRIP2   | cysteine-rich protein 2                                               | U36   |
| 208942_s_at | TLOC1   | translocation protein 1                                               | U93   |
| 208962_s_at | FADS1   | fatty acid desaturase 1                                               | BE552 |
| 208806_at   | CHD3    | chromodomain helicase DNA binding protein 3                           | BE342 |
| 208913_at   | GGA2    | golgi associated, gamma adaptin ear containing, ARF binding protein 2 | AA860 |
| 208791_at   | CLU     | clusterin                                                             | M25   |
| 208792_s_at | CLU     | clusterin                                                             | M25   |
| 208789_at   | PTRF    | polymerase I and transcript release factor                            | BC095 |

|             |         |                                            |        |
|-------------|---------|--------------------------------------------|--------|
|             |         |                                            |        |
| 208790_s_at | PTRF    | polymerase I and transcript release factor | AF393  |
| 208740_at   | SAP18   | Sin3A-associated protein, 18kDa            | BF550  |
| 208763_s_at | TSC22D3 | TSC22 domain family, member 3              | AL191  |
|             |         |                                            |        |
| 208712_at   | CCND1   | cyclin D1                                  | M73    |
| 208723_at   | USP11   | ubiquitin specific peptidase 11            | BC050  |
| 208158_s_at | OSBPL1A | oxysterol binding protein-like 1A          | NM_030 |
|             |         |                                            |        |
| 208711_s_at | CCND1   | cyclin D1                                  | BC076  |

|             |             |                                                                                         |        |
|-------------|-------------|-----------------------------------------------------------------------------------------|--------|
|             |             |                                                                                         |        |
| 207966_s_at | GLG1        | golgi apparatus protein 1                                                               | NM_201 |
| 208131_s_at | PTGIS       | prostaglandin I2 (prostacyclin) synthase                                                | NM_961 |
| 207955_at   | CCL27       | chemokine (C-C motif) ligand 27                                                         | NM_664 |
| 207961_x_at | MYH11       | myosin, heavy chain 11, smooth muscle                                                   | NM_870 |
| 207317_s_at | CASQ2       | calsequestrin 2 (cardiac muscle)                                                        | NM_232 |
| 207760_s_at | NCOR2       | nuclear receptor co-repressor 2                                                         | NM_312 |
| 207283_at   | RPL23AP13   | ribosomal protein L23a pseudogene 13                                                    | NM_217 |
| 207302_at   | SGCG        | sarcoglycan, gamma (35kDa dystrophin-associated glycoprotein)                           | NM_231 |
| 206702_at   | TEK         | TEK tyrosine kinase, endothelial (venous malformations, multiple cutaneous and mucosal) | NM_459 |
| 206898_at   | CDH19       | cadherin 19, type 2                                                                     | NM_153 |
| 206548_at   | hCG_1776259 | hypothetical protein FLJ23556                                                           | NM_880 |
| 206595_at   | CST6        | cystatin E/M                                                                            | NM_323 |

|                 |        |                                                       |            |
|-----------------|--------|-------------------------------------------------------|------------|
| 206194_<br>at   | HOXC6  | homeobox C6                                           | AW2<br>98  |
| 206509_<br>at   | PIP    | prolactin-induced protein                             | NM_<br>652 |
| 206059_<br>at   | ZNF91  | zinc finger protein 91                                | NM_<br>430 |
| 206170_<br>at   | ADRB2  | adrenergic, beta-2-, receptor, surface                | NM_<br>024 |
| 205883_<br>at   | ZBTB16 | zinc finger and BTB domain containing 16              | NM_<br>006 |
| 205923_<br>at   | RELN   | reelin                                                | NM_<br>045 |
| 205765_<br>at   | CYP3A5 | cytochrome P450, family 3, subfamily A, polypeptide 5 | NM_<br>777 |
| 205878_<br>at   | POU6F1 | POU class 6 homeobox 1                                | NM_<br>702 |
| 205726_<br>at   | DIAPH2 | diaphanous homolog 2 (Drosophila)                     | NM_<br>729 |
| 205730_<br>s_at | ABLIM3 | actin binding LIM protein family, member 3            | NM_<br>945 |
| 205613_<br>at   | SYT17  | synaptotagmin XVII                                    | NM_<br>524 |
| 205619_<br>s_at | MEOX1  | mesenchyme homeobox 1                                 | NM_<br>527 |

|             |         |                                                                                 |        |
|-------------|---------|---------------------------------------------------------------------------------|--------|
| 205547_s_at | TAGLN   | transgelin                                                                      | NM_186 |
| 205583_s_at | CXorf45 | chromosome X open reading frame 45                                              | NM_810 |
| 205471_s_at | DACH1   | dachshund homolog 1 (Drosophila)                                                | NM_392 |
| 205478_at   | PPP1R1A | protein phosphatase 1, regulatory (inhibitor) subunit 1A                        | NM_741 |
| 205384_at   | FXYP1   | FXYP domain containing ion transport regulator 1 (phospholemman)                | NM_031 |
| 205463_s_at | PDGFA   | platelet-derived growth factor alpha polypeptide                                | NM_607 |
| 205330_at   | MN1     | meningioma (disrupted in balanced translocation) 1                              | NM_430 |
| 205383_s_at | ZBTB20  | zinc finger and BTB domain containing 20                                        | NM_642 |
| 205277_at   | PRDM2   | PR domain containing 2, with ZNF domain                                         | NM_231 |
| 205315_s_at | SNTB2   | syntrophin, beta 2 (dystrophin-associated protein A1, 59kDa, basic component 2) | NM_750 |
| 205236_x_at | SOD3    | superoxide dismutase 3, extracellular                                           | NM_102 |
| 205258_at   | INHBB   | inhibin, beta B                                                                 | NM_193 |
| 205168_at   | DDR2    | discoidin domain receptor family, member 2                                      | NM_182 |
| 205198_s_at | ATP7A   | ATPase, Cu <sup>++</sup> transporting, alpha polypeptide (Menkes syndrome)      | NM_052 |



|             |            |                                                          |        |
|-------------|------------|----------------------------------------------------------|--------|
|             |            |                                                          |        |
| 205110_s_at | FGF13      | fibroblast growth factor 13                              | NM_114 |
| 205132_at   | ACTC1      | actin, alpha, cardiac muscle 1                           | NM_159 |
| 205073_at   | CYP2J2     | cytochrome P450, family 2, subfamily J, polypeptide 2    | NM_775 |
| 205081_at   | CRIP1      | cysteine-rich protein 1 (intestinal)                     | NM_311 |
| 205006_s_at | NMT2       | N-myristoyltransferase 2                                 | NM_808 |
| 205011_at   | LOH11CR2 A | loss of heterozygosity, 11, chromosomal region 2, gene A | NM_622 |
| 204964_s_at | SSPN       | sarcospan (Kras oncogene-associated gene)                | AL156  |
| 204985_s_at | TRAPPC6A   | trafficking protein particle complex 6A                  | NM_108 |
| 204838_s_at | MLH3       | mutL homolog 3 (E. coli)                                 | NM_381 |
| 204948_s_at | FST        | follistatin                                              | NM_409 |
| 204797_s_at | EML1       | echinoderm microtubule associated protein like 1         | NM_434 |
| 204800_s_at | DHRS12     | dehydrogenase/reductase (SDR family) member 12           | NM_705 |
| 204718_at   | EPHB6      | EPH receptor B6                                          | NM_445 |
| 204788_s_at | PPOX       | protoporphyrinogen oxidase                               | NM_309 |
| 204497_at   | ADCY9      | adenylate cyclase 9                                      | AB092  |

|             |          |                                                                                                                        |        |
|-------------|----------|------------------------------------------------------------------------------------------------------------------------|--------|
|             |          |                                                                                                                        |        |
| 204610_s_at | CCDC85B  | coiled-coil domain containing 85B                                                                                      | NM_848 |
| 204431_at   | TLE2     | transducin-like enhancer of split 2 (E(sp1) homolog, Drosophila)                                                       | NM_260 |
| 204442_x_at | LTBP4    | latent transforming growth factor beta binding protein 4                                                               | NM_573 |
| 204303_s_at | KIAA0427 | KIAA0427                                                                                                               | NM_772 |
| 204422_s_at | FGF2     | fibroblast growth factor 2 (basic)                                                                                     | NM_006 |
| 204257_at   | FADS3    | fatty acid desaturase 3                                                                                                | NM_727 |
| 204288_s_at | SORBS2   | sorbin and SH3 domain containing 2                                                                                     | NM_069 |
| 204151_x_at | AKR1C1   | aldo-keto reductase family 1, member C1 (dihydrodiol dehydrogenase 1; 20-alpha (3-alpha)-hydroxysteroid dehydrogenase) | NM_353 |
| 204248_at   | GNA11    | guanine nucleotide binding protein (G protein), alpha 11 (Gq class)                                                    | NM_067 |

|             |          |                                                          |        |
|-------------|----------|----------------------------------------------------------|--------|
| 204106_at   | TESK1    | testis-specific kinase 1                                 | NM_285 |
| 204134_at   | PDE2A    | phosphodiesterase 2A, cGMP-stimulated                    | NM_599 |
| 204066_s_at | CENTG2   | centaurin, gamma 2                                       | NM_914 |
| 204069_at   | MEIS1    | Meis homeobox 1                                          | NM_398 |
| 203929_s_at | MAPT     | microtubule-associated protein tau                       | AI059  |
| 204021_s_at | PURA     | purine-rich element binding protein A                    | NM_859 |
| 203872_at   | ACTA1    | actin, alpha 1, skeletal muscle                          | NM_100 |
| 203906_at   | IQSEC1   | IQ motif and Sec7 domain 1                               | AI655  |
| 203851_at   | IGFBP6   | insulin-like growth factor binding protein 6             | NM_178 |
| 203865_s_at | ADARB1   | adenosine deaminase, RNA-specific, B1 (RED1 homolog rat) | NM_833 |
| 203813_s_at | SLIT3    | slit homolog 3 (Drosophila)                              | AB038  |
| 203825_at   | BRD3     | bromodomain containing 3                                 | NM_371 |
| 203729_at   | EMP3     | epithelial membrane protein 3                            | NM_425 |
| 203756_at   | ARHGEF17 | Rho guanine nucleotide exchange factor (GEF) 17          | NM_786 |
| 203706_s_at | FZD7     | frizzled homolog 7 (Drosophila)                          | NM_507 |

|             |        |                                                              |        |
|-------------|--------|--------------------------------------------------------------|--------|
| 203723_at   | ITPKB  | inositol 1,4,5-trisphosphate 3-kinase B                      | NM_221 |
| 203697_at   | FRZB   | frizzled-related protein                                     | U919   |
| 203698_s_at | FRZB   | frizzled-related protein                                     | U919   |
| 203632_s_at | GPRC5B | G protein-coupled receptor, family C, group 5, member B      | NM_235 |
| 203685_at   | BCL2   | B-cell CLL/lymphoma 2                                        | NM_633 |
| 203521_s_at | ZNF318 | zinc finger protein 318                                      | NM_345 |
| 203628_at   | IGF1R  | insulin-like growth factor 1 receptor                        | H051   |
| 203424_s_at | IGFBP5 | insulin-like growth factor binding protein 5                 | AW148  |
| 203509_at   | SORL1  | sortilin-related receptor, L(DLR class) A repeats-containing | NM_105 |
| 203355_s_at | PSD3   | pleckstrin and Sec7 domain containing 3                      | NM_310 |
| 203382_s_at | APOE   | apolipoprotein E                                             | NM_041 |

|             |          |                                                                                        |        |
|-------------|----------|----------------------------------------------------------------------------------------|--------|
|             |          |                                                                                        |        |
| 203249_at   | EZH1     | enhancer of zeste homolog 1 (Drosophila)                                               | AB086  |
| 203304_at   | BAMBI    | BMP and activin membrane-bound inhibitor homolog (Xenopus laevis)                      | NM_342 |
| 203151_at   | MAP1A    | microtubule-associated protein 1A                                                      | NM_373 |
|             |          |                                                                                        |        |
| 203188_at   | B3GNT1   | UDP-GlcNAc:betaGal beta-1,3-N-acetylglucosaminyltransferase 1                          | NM_876 |
| 203071_at   | SEMA3B   | sema domain, immunoglobulin domain (Ig), short basic domain, secreted, (semaphorin) 3B | NM_636 |
| 203081_at   | CTNNBIP1 | catenin, beta interacting protein 1                                                    | NM_248 |
| 203020_at   | RABGAP1L | RAB GTPase activating protein 1-like                                                   | NM_857 |
|             |          |                                                                                        |        |
| 203065_s_at | CAV1     | caveolin 1, caveolae protein, 22kDa                                                    | NM_753 |
| 202982_s_at | ACOT2    | acyl-CoA thioesterase 2                                                                | NM_821 |
|             |          |                                                                                        |        |
| 203006_at   | INPP5A   | inositol polyphosphate-5-phosphatase, 40kDa                                            | NM_539 |
| 202908_at   | WFS1     | Wolfram syndrome 1 (wolframin)                                                         | NM_005 |
| 202975_s_at | RHOBTB3  | Rho-related BTB domain containing 3                                                    | N21    |

|             |             |                                                            |        |
|-------------|-------------|------------------------------------------------------------|--------|
| 202759_s_at | PALM2-AKAP2 | PALM2-AKAP2 protein                                        | BE867  |
| 202796_at   | SYNPO       | synaptopodin                                               | NM_286 |
| 202724_s_at | FOXO1       | forkhead box O1                                            | NM_015 |
| 202732_at   | PKIG        | protein kinase (cAMP-dependent, catalytic) inhibitor gamma | NM_066 |
| 202669_s_at | EFNB2       | ephrin-B2                                                  | U16    |
| 202723_s_at | FOXO1       | forkhead box O1                                            | AW198  |
| 202519_at   | MLXIP       | MLX interacting protein                                    | NM_938 |
| 202548_s_at | ARHGEF7     | Rho guanine nucleotide exchange factor (GEF) 7             | NM_899 |
| 202500_at   | DNAJB2      | DnaJ (Hsp40) homolog, subfamily B, member 2                | NM_736 |
| 202512_s_at | ATG5        | ATG5 autophagy related 5 homolog (S. cerevisiae)           | AK099  |
| 202468_s_at | CTNNAL1     | catenin (cadherin-associated protein), alpha-like 1        | NM_798 |
| 202481_at   | DHRS3       | dehydrogenase/reductase (SDR family) member 3              | NM_753 |
| 202328_s_at | PKD1        | polycystic kidney disease 1 (autosomal dominant)           | NM_296 |

|             |         |                                                           |        |
|-------------|---------|-----------------------------------------------------------|--------|
| 202368_s_at | TRAM2   | translocation associated membrane protein 2               | NM_288 |
| 202273_at   | PDGFRB  | platelet-derived growth factor receptor, beta polypeptide | NM_609 |
| 202289_s_at | TACC2   | transforming, acidic coiled-coil containing protein 2     | NM_997 |
| 202250_s_at | WDR42A  | WD repeat domain 42A                                      | NM_726 |
| 202262_x_at | DDAH2   | dimethylarginine dimethylaminohydrolase 2                 | NM_974 |
| 202196_s_at | DKK3    | dickkopf homolog 3 ( <i>Xenopus laevis</i> )              | NM_253 |
| 202222_s_at | DES     | desmin                                                    | NM_927 |
| 202177_at   | GAS6    | growth arrest-specific 6                                  | NM_820 |
| 202191_s_at | GAS7    | growth arrest-specific 7                                  | BE4_87 |
| 202054_s_at | ALDH3A2 | aldehyde dehydrogenase 3 family, member A2                | NM_382 |

|             |          |                                                                             |        |
|-------------|----------|-----------------------------------------------------------------------------|--------|
|             |          |                                                                             |        |
| 202112_at   | VWF      | von Willebrand factor                                                       | NM_552 |
| 202017_at   | EPHX1    | epoxide hydrolase 1, microsomal (xenobiotic)                                | NM_120 |
| 202022_at   | ALDOC    | aldolase C, fructose-bisphosphate                                           | NM_165 |
| 201917_s_at | SLC25A36 | solute carrier family 25, member 36                                         | NM_155 |
| 201952_at   | ALCAM    | activated leukocyte cell adhesion molecule                                  | AA1_21 |
| 201810_s_at | SH3BP5   | SH3-domain binding protein 5 (BTK-associated)                               | AL5_52 |
| 201911_s_at | FARP1    | FERM, RhoGEF (ARHGEF) and pleckstrin domain protein 1 (chondrocyte-derived) | NM_766 |



|             |          |                                                              |        |
|-------------|----------|--------------------------------------------------------------|--------|
| 201802_at   | SLC29A1  | solute carrier family 29 (nucleoside transporters), member 1 | NM_955 |
| 201809_s_at | ENG      | endoglin (Osler-Rendu-Weber syndrome 1)                      | NM_118 |
| 201660_at   | ACSL3    | acyl-CoA synthetase long-chain family member 3               | AL598  |
| 201737_s_at | 6-Mar    | membrane-associated ring finger (C3HC4) 6                    | NM_885 |
| 201602_s_at | PPP1R12A | protein phosphatase 1, regulatory (inhibitor) subunit 12A    | NM_480 |
| 201655_s_at | HSPG2    | heparan sulfate proteoglycan 2                               | AI993  |
| 201525_at   | APOD     | apolipoprotein D                                             | NM_647 |
| 201578_at   | PODXL    | podocalyxin-like                                             | NM_397 |
| 201389_at   | ITGA5    | integrin, alpha 5 (fibronectin receptor, alpha polypeptide)  | NM_205 |
| 201416_at   | SOX4     | SRY (sex determining region Y)-box 4                         | NM_107 |
| 201261_x_at | BGN      | biglycan                                                     | BC016  |
| 201313_at   | ENO2     | enolase 2 (gamma, neuronal)                                  | NM_975 |
| 200974_at   | ACTA2    | actin, alpha 2, smooth muscle, aorta                         | NM_613 |
| 201058_s_at | MYL9     | myosin, light chain 9, regulatory                            | NM_097 |
| 200676_s_at | UBE2L3   | ubiquitin-conjugating enzyme E2L 3                           | NM_347 |
| 200747_s_at | NUMA1    | nuclear mitotic apparatus protein 1                          | NM_185 |

|             |          |                                                      |        |
|-------------|----------|------------------------------------------------------|--------|
| 1598_g_at   | GAS6     | growth arrest-specific 6                             | L137   |
| 200621_at   | CSRP1    | cysteine and glycine-rich protein 1                  | NM_078 |
| 58780_s_at  | FLJ10357 | hypothetical protein FLJ10357                        | R42    |
| 208109_s_at | C15orf5  | chromosome 15 open reading frame 5                   | NM_944 |
| 222357_at   | ZBTB20   | zinc finger and BTB domain containing 20             | AW923  |
| 37408_at    | MRC2     | mannose receptor, C type 2                           | AB009  |
| 221988_at   | MED26    | mediator complex subunit 26                          | AA453  |
| 222101_s_at | DCHS1    | dachsous 1 (Drosophila)                              | BF293  |
| 221796_at   | NTRK2    | neurotrophic tyrosine kinase, receptor, type 2       | AA799  |
| 221814_at   | GPR124   | G protein-coupled receptor 124                       | BF515  |
| 221589_s_at | ALDH6A1  | aldehyde dehydrogenase 6 family, member A1           | AW603  |
| 221645_s_at | ZNF83    | zinc finger protein 83                               | M27    |
| 221127_s_at | RIG      | regulated in glioma                                  | NM_394 |
| 221276_s_at | SYNC1    | syncoilin, intermediate filament 1                   | NM_786 |
| 220917_s_at | WDR19    | WD repeat domain 19                                  | NM_132 |
| 221011_s_at | LBH      | limb bud and heart development homolog (mouse)       | NM_915 |
| 220170_at   | FHL5     | four and a half LIM domains 5                        | NM_482 |
| 220692_at   | POLR2J2  | DNA directed RNA polymerase II polypeptide J-related | NM_147 |
| 219777_at   | GIMAP6   | GTPase, IMAP family member 6                         | NM_    |

|             |         |                                                              |        |
|-------------|---------|--------------------------------------------------------------|--------|
| at          |         |                                                              | 711    |
| 219778_at   | ZFPM2   | zinc finger protein, multitype 2                             | NM_082 |
| 219440_at   | RAI2    | retinoic acid induced 2                                      | NM_785 |
| 219518_s_at | ELL3    | elongation factor RNA polymerase II-like 3                   | NM_165 |
| 219368_at   | NAP1L2  | nucleosome assembly protein 1-like 2                         | NM_963 |
| 219432_at   | EVC     | Ellis van Creveld syndrome                                   | NM_556 |
| 219134_at   | ELTD1   | EGF, latrophilin and seven transmembrane domain containing 1 | NM_159 |
| 219213_at   | JAM2    | junctional adhesion molecule 2                               | NM_219 |
| 219025_at   | CD248   | CD248 molecule, endosialin                                   | NM_404 |
| 219093_at   | PID1    | phosphotyrosine interaction domain containing 1              | NM_933 |
| 218718_at   | PDGFC   | platelet derived growth factor C                             | NM_205 |
| 218966_at   | MYO5C   | myosin VC                                                    | NM_728 |
| 218656_s_at | LHFP    | lipoma HMGIC fusion partner                                  | NM_780 |
| 218692_at   | GOLSYN  | Golgi-localized protein                                      | NM_786 |
| 218573_at   | MAGEH1  | melanoma antigen family H, 1                                 | NM_061 |
| 218638_s_at | SPON2   | spondin 2, extracellular matrix protein                      | NM_445 |
| 218490_s_at | ZNF302  | zinc finger protein 302                                      | NM_443 |
| 218532_at   | FAM134B | family with sequence similarity 134, member B                | NM_443 |

|             |          |                                                          |        |
|-------------|----------|----------------------------------------------------------|--------|
| s_at        |          |                                                          | 000    |
| 217858_s_at | ARMCX3   | armadillo repeat containing, X-linked 3                  | NM_607 |
| 218211_s_at | MLPH     | melanophilin                                             | NM_101 |
| 217771_at   | GOLM1    | golgi membrane protein 1                                 | NM_548 |
| 217853_at   | TNS3     | tensin 3                                                 | NM_748 |
| 217025_s_at | DBN1     | drebrin 1                                                | AL1_25 |
| 217504_at   | ABCA6    | ATP-binding cassette, sub-family A (ABC1), member 6      | AA0_57 |
| 216442_x_at | FN1      | fibronectin 1                                            | AK0_37 |
| 216620_s_at | ARHGEF10 | Rho guanine nucleotide exchange factor (GEF) 10          | AF0_05 |
| 216320_x_at | MST1     | macrophage stimulating 1 (hepatocyte growth factor-like) | U37    |
| 216333_x_at | TNXB     | tenascin XB                                              | M25    |
| 215322_at   | LONRF1   | LON peptidase N-terminal domain and ring finger 1        | AL0_90 |
| 215516_at   | LAMB4    | laminin, beta 4                                          | AC0_48 |
| 215073_s_at | NR2F2    | nuclear receptor subfamily 2, group F, member 2          | AL5_45 |

|             |          |                                                                             |       |
|-------------|----------|-----------------------------------------------------------------------------|-------|
| 215116_s_at | DNM1     | dynamain 1                                                                  | AF021 |
| 214823_at   | ZNF204   | zinc finger protein 204                                                     | AF099 |
| 214850_at   | GUSBP1   | glucuronidase, beta pseudogene 1                                            | X75   |
| 214724_at   | DIXDC1   | DIX domain containing 1                                                     | AF021 |
| 214761_at   | ZNF423   | zinc finger protein 423                                                     | AW117 |
| 214439_x_at | BIN1     | bridging integrator 1                                                       | AF099 |
| 214451_at   | TFAP2B   | transcription factor AP-2 beta (activating enhancer binding protein 2 beta) | NM221 |
| 214180_at   | MAN1C1   | mannosidase, alpha, class 1C, member 1                                      | AW388 |
| 214433_s_at | SELENBP1 | selenium binding protein 1                                                  | NM944 |
| 214102_at   | CENTD1   | centaurin, delta 1                                                          | AK037 |
| 214152_at   | CCPG1    | cell cycle progression 1                                                    | AU143 |
| 213939_s_at | RUFY3    | RUN and FYVE domain containing 3                                            | AI871 |
| 214027_x_at | DES      | desmin                                                                      | AA853 |
| 213675_at   |          |                                                                             | W61   |
| 213764_s_at | MFAP5    | microfibrillar associated protein 5                                         | AW692 |
| 213568_at   | OSR2     | odd-skipped related 2 (Drosophila)                                          | AI818 |
| 213620_s_at | ICAM2    | intercellular adhesion molecule 2                                           | AA128 |
| 213451_x_at | TNXB     | tenascin XB                                                                 | BE014 |

|             |        |                                                                                                                                             |       |
|-------------|--------|---------------------------------------------------------------------------------------------------------------------------------------------|-------|
| 213541_s_at | ERG    | v-ets erythroblastosis virus E26 oncogene homolog (avian)                                                                                   | AI353 |
| 213413_at   | STON1  | stonin 1                                                                                                                                    | BG474 |
| 213422_s_at | MXRA8  | matrix-remodelling associated 8                                                                                                             | AW823 |
| 213369_at   | PCDH21 | protocadherin 21                                                                                                                            | AI822 |
| 213380_x_at | MSTP9  | macrophage stimulating, pseudogene 9                                                                                                        | AA935 |
| 213348_at   | CDKN1C | cyclin-dependent kinase inhibitor 1C (p57, Kip2)                                                                                            | N33   |
| 213364_s_at | SNX1   | sorting nexin 1                                                                                                                             | AI056 |
| 213222_at   | PLCB1  | phospholipase C, beta 1 (phosphoinositide-specific)                                                                                         | AL093 |
| 213290_at   | COL6A2 | collagen, type VI, alpha 2                                                                                                                  | AL550 |
| 213169_at   | SEMA5A | sema domain, seven thrombospondin repeats (type 1 and type 1-like), transmembrane domain (TM) and short cytoplasmic domain, (semaphorin) 5A | BG155 |
| 213217_at   | ADCY2  | adenylate cyclase 2 (brain)                                                                                                                 | AU172 |

|               |         |                                                                          |            |
|---------------|---------|--------------------------------------------------------------------------|------------|
|               |         |                                                                          |            |
| 213106_<br>at | ATP8A1  | ATPase, aminophospholipid transporter (APLT), Class I, type 8A, member 1 | AI76<br>8  |
| 213122_<br>at | TSPYL5  | TSPY-like 5                                                              | AI09<br>5  |
| 213075_<br>at | OLFML2A | olfactomedin-like 2A                                                     | AL05<br>02 |
| 213093_<br>at | PRKCA   | protein kinase C, alpha                                                  | AI47<br>5  |

|               |          |                                                          |        |
|---------------|----------|----------------------------------------------------------|--------|
| 213058_<br>at | TTC28    | tetratricopeptide repeat domain 28                       | AL0338 |
| 213059_<br>at | CREB3L1  | cAMP responsive element binding protein 3-like 1         | AF0909 |
| 213018_<br>at | GATAD1   | GATA zinc finger domain containing 1                     | AI3311 |
| 213032_<br>at | NFIB     | nuclear factor I/B                                       | AI1899 |
| 212980_<br>at | USP34    | ubiquitin specific peptidase 34                          | AL0776 |
| 212985_<br>at |          |                                                          | BF139  |
| 212950_<br>at | GPR116   | G protein-coupled receptor 116                           | BF999  |
| 212951_<br>at | GPR116   | G protein-coupled receptor 116                           | N95    |
| 212845_<br>at | SAMD4A   | sterile alpha motif domain containing 4A                 | AB076  |
| 212914_<br>at | CBX7     | chromobox homolog 7                                      | AV664  |
| 212793_<br>at | DAAM2    | dishevelled associated activator of morphogenesis 2      | BF544  |
| 212805_<br>at |          |                                                          | AL149  |
| 212764_<br>at | ZEB1     | zinc finger E-box binding homeobox 1                     | AI376  |
| 212771_<br>at | C10orf38 | chromosome 10 open reading frame 38                      | AU143  |
| 212761_<br>at | TCF7L2   | transcription factor 7-like 2 (T-cell specific, HMG-box) | AI704  |



|                 |        |                                                                         |           |
|-----------------|--------|-------------------------------------------------------------------------|-----------|
|                 |        |                                                                         |           |
| 212762_<br>s_at | TCF7L2 | transcription factor 7-like 2 (T-cell specific, HMG-box)                | AI37<br>6 |
| 212675_<br>s_at | CEP68  | centrosomal protein 68kDa                                               | AB0<br>54 |
| 212690_<br>at   | DDHD2  | DDHD domain containing 2                                                | AB0<br>68 |
| 212609_<br>s_at | AKT3   | v-akt murine thymoma viral oncogene homolog 3 (protein kinase B, gamma) | U79       |

|             |          |                                                              |       |
|-------------|----------|--------------------------------------------------------------|-------|
|             |          |                                                              |       |
| 212660_at   | PHF15    | PHD finger protein 15                                        | AI739 |
| 212504_at   | DIP2C    | DIP2 disco-interacting protein 2 homolog C (Drosophila)      | N311  |
| 212560_at   | SORL1    | sortilin-related receptor, L(DLR class) A repeats-containing | AV768 |
| 212488_at   | COL5A1   | collagen, type V, alpha 1                                    | N301  |
| 212503_s_at | DIP2C    | DIP2 disco-interacting protein 2 homolog C (Drosophila)      | N221  |
| 212423_at   | C10orf56 | chromosome 10 open reading frame 56                          | AK084 |
| 212464_s_at | FN1      | fibronectin 1                                                | X021  |
| 212343_at   | YIPF6    | Yip1 domain family, member 6                                 | AL161 |
| 212419_at   | C10orf56 | chromosome 10 open reading frame 56                          | AA124 |
| 212158_at   | SDC2     | syndecan 2                                                   | AL522 |
| 212233_at   |          |                                                              | AL576 |
| 211719_x_at | FN1      | fibronectin 1                                                | BC058 |

|                 |        |                                                                           |            |
|-----------------|--------|---------------------------------------------------------------------------|------------|
|                 |        |                                                                           |            |
| 212157_<br>at   | SDC2   | syndecan 2                                                                | AI38<br>8  |
| 210944_<br>s_at | CAPN3  | calpain 3, (p94)                                                          | BC0<br>69  |
| 211105_<br>s_at | NFATC1 | nuclear factor of activated T-cells, cytoplasmic, calcineurin-dependent 1 | U80        |
| 210297_<br>s_at | MSMB   | microseminoprotein, beta-                                                 | U22        |
| 210299_<br>s_at | FHL1   | four and a half LIM domains 1                                             | AF0<br>02  |
| 209763_<br>at   | CHRDL1 | chordin-like 1                                                            | AL04<br>76 |
| 209815_<br>at   | PTCH1  | patched homolog 1 (Drosophila)                                            | BG0<br>16  |
| 209655_<br>s_at | TMEM47 | transmembrane protein 47                                                  | AL13<br>50 |
| 209685_<br>s_at | PRKCB1 | protein kinase C, beta 1                                                  | M13        |

|               |          |                                                                                     |           |
|---------------|----------|-------------------------------------------------------------------------------------|-----------|
|               |          |                                                                                     |           |
| 209550_<br>at | NDN      | neccin homolog (mouse)                                                              | U35       |
| 209651_<br>at | TGFB111  | transforming growth factor beta 1 induced transcript 1                              | BC0<br>30 |
| 209443_<br>at | SERPINA5 | serpin peptidase inhibitor, clade A (alpha-1 antiproteinase, antitrypsin), member 5 | J026      |
| 209447_<br>at | SYNE1    | spectrin repeat containing, nuclear envelope 1                                      | AF0<br>90 |
| 209335_<br>at | DCN      | decorin                                                                             | BC0<br>22 |
| 209343_<br>at | EFHD1    | EF-hand domain family, member D1                                                    | BC0<br>49 |
| 209292_<br>at | ID4      | inhibitor of DNA binding 4, dominant negative helix-loop-helix protein              | AL0<br>26 |

|             |          |                                                                                         |        |
|-------------|----------|-----------------------------------------------------------------------------------------|--------|
| 209298_s_at | ITSN1    | intersectin 1 (SH3 domain protein)                                                      | AF188  |
| 209242_at   | PEG3     | paternally expressed 3                                                                  | AL0488 |
| 209291_at   | ID4      | inhibitor of DNA binding 4, dominant negative helix-loop-helix protein                  | AW194  |
| 209200_at   | MEF2C    | myocyte enhancer factor 2C                                                              | AL517  |
| 209210_s_at | PLEKHC1  | pleckstrin homology domain containing, family C (with FERM domain) member 1             | Z24    |
| 209160_at   | AKR1C3   | aldo-keto reductase family 1, member C3 (3-alpha hydroxysteroid dehydrogenase, type II) | AB080  |
| 209183_s_at | C10orf10 | chromosome 10 open reading frame 10                                                     | AL1153 |
| 209120_at   | NR2F2    | nuclear receptor subfamily 2, group F, member 2                                         | AL0301 |
| 209121_x_at | NR2F2    | nuclear receptor subfamily 2, group F, member 2                                         | M64    |
| 209094_at   | DDAH1    | dimethylarginine dimethylaminohydrolase 1                                               | AL0759 |
| 209101_at   | CTGF     | connective tissue growth factor                                                         | M92    |
| 208964_s_at | FADS1    | fatty acid desaturase 1                                                                 | AL560  |
| 208983_s_at | PECAM1   | platelet/endothelial cell adhesion molecule (CD31 antigen)                              | M37    |

|             |           |                                                            |        |
|-------------|-----------|------------------------------------------------------------|--------|
| 208760_at   | UBE2I     | ubiquitin-conjugating enzyme E2I (UBC9 homolog, yeast)     | AL0314 |
| 208869_s_at | GABARAPL1 | GABA(A) receptor-associated protein like 1                 | BF156  |
| 208335_s_at | DARC      | Duffy blood group, chemokine receptor                      | NM_036 |
| 208498_s_at | AMY1A     | amylase, alpha 1A (salivary)                               | NM_038 |
| 208015_at   | SMAD1     | SMAD family member 1                                       | NM_583 |
| 208096_s_at | COL21A1   | collagen, type XXI, alpha 1                                | NM_820 |
| 207430_s_at | MSMB      | microseminoprotein, beta-                                  | NM_443 |
| 207522_s_at | ATP2A3    | ATPase, Ca <sup>++</sup> transporting, ubiquitous          | NM_173 |
| 207177_at   | PTGFR     | prostaglandin F receptor (FP)                              | NM_959 |
| 207191_s_at | ISLR      | immunoglobulin superfamily containing leucine-rich repeat  | NM_545 |
| 206873_at   | CA6       | carbonic anhydrase VI                                      | NM_215 |
| 207123_s_at | MATN4     | matrilin 4                                                 | NM_833 |
| 206580_s_at | EFEMP2    | EGF-containing fibulin-like extracellular matrix protein 2 | NM_938 |
| 206858_s_at | HOXC6     | homeobox C6                                                | NM_503 |
| 206373_at   | ZIC1      | Zic family member 1 (odd-paired homolog, Drosophila)       | NM_412 |
| 206481_s_at | LDB2      | LIM domain binding 2                                       | NM_290 |
| 206159_at   | GDF10     | growth differentiation factor 10                           | NM_962 |

|             |         |                                                                            |        |
|-------------|---------|----------------------------------------------------------------------------|--------|
| 206201_s_at | MEOX2   | mesenchyme homeobox 2                                                      | NM_924 |
| 206070_s_at | EPHA3   | EPH receptor A3                                                            | AF259  |
| 206093_x_at | TNXB    | tenascin XB                                                                | NM_116 |
| 205932_s_at | MSX1    | msh homeobox 1                                                             | NM_448 |
| 205933_at   | SETBP1  | SET binding protein 1                                                      | NM_559 |
| 205794_s_at | NOVA1   | neuro-oncological ventral antigen 1                                        | NM_515 |
| 205802_at   | TRPC1   | transient receptor potential cation channel, subfamily C, member 1         | NM_304 |
| 205620_at   | F10     | coagulation factor X                                                       | NM_504 |
| 205752_s_at | GSTM5   | glutathione S-transferase M5                                               | NM_851 |
| 205609_at   | ANGPT1  | angiopoietin 1                                                             | NM_146 |
| 205614_x_at | MST1    | macrophage stimulating 1 (hepatocyte growth factor-like)                   | NM_998 |
| 205528_s_at | RUNX1T1 | runt-related transcription factor 1; translocated to, 1 (cyclin D-related) | X79    |
| 205594_at   | ZNF652  | zinc finger protein 652                                                    | NM_897 |
| 205440_s_at | NPY1R   | neuropeptide Y receptor Y1                                                 | NM_909 |
| 205525_s_at | CALD1   | caldesmon 1                                                                | NM_924 |

|             |         |                                                              |        |
|-------------|---------|--------------------------------------------------------------|--------|
| at          |         |                                                              | 495    |
| 205392_s_at | CCL14   | chemokine (C-C motif) ligand 14                              | NM_166 |
| 205404_at   | HSD11B1 | hydroxysteroid (11-beta) dehydrogenase 1                     | NM_525 |
| 205259_at   | NR3C2   | nuclear receptor subfamily 3, group C, member 2              | NM_901 |
| 205304_s_at | KCNJ8   | potassium inwardly-rectifying channel, subfamily J, member 8 | BF558  |
| 205141_at   | ANG     | angiogenin, ribonuclease, RNase A family, 5                  | NM_145 |
| 205200_at   | CLEC3B  | C-type lectin domain family 3, member B                      | NM_278 |
| 205076_s_at | MTMR11  | myotubularin related protein 11                              | NM_697 |
| 205116_at   | LAMA2   | laminin, alpha 2 (merosin, congenital muscular dystrophy)    | NM_426 |
| 204992_s_at | PFN2    | profilin 2                                                   | NM_628 |
| 205044_at   | GABRP   | gamma-aminobutyric acid (GABA) A receptor, pi                | NM_211 |
| 204754_at   | HLF     | hepatic leukemia factor                                      | W60    |



|             |         |                                                          |        |
|-------------|---------|----------------------------------------------------------|--------|
|             |         |                                                          |        |
| 204773_at   | IL11RA  | interleukin 11 receptor, alpha                           | NM_512 |
| 204731_at   | TGFBR3  | transforming growth factor, beta receptor III            | NM_243 |
| 204734_at   | KRT15   | keratin 15                                               | NM_275 |
| 204686_at   | IRS1    | insulin receptor substrate 1                             | NM_544 |
| 204688_at   | SGCE    | sarcoglycan, epsilon                                     | NM_919 |
| 204671_s_at | ANKRD6  | ankyrin repeat domain 6                                  | BE631  |
| 204677_at   | CDH5    | cadherin 5, type 2, VE-cadherin (vascular epithelium)    | NM_795 |
| 204570_at   | COX7A1  | cytochrome c oxidase subunit VIIa polypeptide 1 (muscle) | NM_864 |
| 204604_at   | PFTK1   | PFTAIRE protein kinase 1                                 | NM_395 |
| 204352_at   | TRAF5   | TNF receptor-associated factor 5                         | NM_619 |
| 204363_at   | F3      | coagulation factor III (thromboplastin, tissue factor)   | NM_993 |
| 204284_at   | PPP1R3C | protein phosphatase 1, regulatory (inhibitor) subunit 3C | N26    |
| 204345_at   | COL16A1 | collagen, type XVI, alpha 1                              | NM_856 |
| 204223_at   | PRELP   | proline/arginine-rich end leucine-rich repeat protein    | NM_725 |
| 204276_at   | TK2     | thymidine kinase 2, mitochondrial                        | BE837  |

|             |          |                                                                                  |        |
|-------------|----------|----------------------------------------------------------------------------------|--------|
| 204083_s_at | TPM2     | tropomyosin 2 (beta)                                                             | NM_289 |
| 204115_at   | GNG11    | guanine nucleotide binding protein (G protein), gamma 11                         | NM_126 |
| 204036_at   | EDG2     | endothelial differentiation, lysophosphatidic acid G-protein-coupled receptor, 2 | AW235  |
| 204037_at   | EDG2     | endothelial differentiation, lysophosphatidic acid G-protein-coupled receptor, 2 | BF066  |
| 203951_at   | CNN1     | calponin 1, basic, smooth muscle                                                 | NM_299 |
| 204030_s_at | SCHIP1   | schwannomin interacting protein 1                                                | NM_575 |
| 203903_s_at | HEPH     | hephaestin                                                                       | NM_799 |
| 203919_at   | TCEA2    | transcription elongation factor A (SII), 2                                       | NM_195 |
| 203812_at   | SLIT3    | slit homolog 3 (Drosophila)                                                      | AB038  |
| 203881_s_at | DMD      | dystrophin (muscular dystrophy, Duchenne and Becker types)                       | NM_010 |
| 203766_s_at | LMOD1    | leiomodoin 1 (smooth muscle)                                                     | NM_134 |
| 203794_at   | CDC42BPA | CDC42 binding protein kinase alpha (DMPK-like)                                   | NM_826 |
| 203657_s_at | CTSF     | cathepsin F                                                                      | NM_793 |
| 203666_at   | CXCL12   | chemokine (C-X-C motif) ligand 12 (stromal cell-derived factor 1)                | NM_609 |

|             |             |                                                                   |        |
|-------------|-------------|-------------------------------------------------------------------|--------|
| 203335_at   | PHYH        | phytanoyl-CoA 2-hydroxylase                                       | NM_214 |
| 203562_at   | FEZ1        | fasciculation and elongation protein zeta 1 (zygin I)             | NM_103 |
| 203001_s_at | STMN2       | stathmin-like 2                                                   | NM_029 |
| 203167_at   | TIMP2       | TIMP metalloproteinase inhibitor 2                                | NM_255 |
| 202994_s_at | FBLN1       | fibulin 1                                                         | Z95    |
| 202995_s_at | FBLN1       | fibulin 1                                                         | NM_486 |
| 202806_at   | DBN1        | drebrin 1                                                         | NM_395 |
| 202976_s_at | RHOBTB3     | Rho-related BTB domain containing 3                               | NM_899 |
| 202747_s_at | ITM2A       | integral membrane protein 2A                                      | NM_867 |
| 202760_s_at | PALM2-AKAP2 | PALM2-AKAP2 protein                                               | NM_203 |
| 202686_s_at | AXL         | AXL receptor tyrosine kinase                                      | NM_913 |
| 202746_at   | ITM2A       | integral membrane protein 2A                                      | AL0286 |
| 202561_at   | TNKS        | tankyrase, TRF1-interacting ankyrin-related ADP-ribose polymerase | AF013  |
| 202609_at   | EPS8        | epidermal growth factor receptor pathway substrate 8              | NM_447 |
| 202465_at   | PCOLCE      | procollagen C-endopeptidase enhancer                              | NM_593 |
| 202555_s_at | MYLK        | myosin, light chain kinase                                        | NM_965 |
| 202291_s_at | MGP         | matrix Gla protein                                                | NM_900 |
| 202350_at   | MATN2       | matrilin 2                                                        | NM_900 |

|             |          |                                                                   |        |
|-------------|----------|-------------------------------------------------------------------|--------|
| s_at        |          |                                                                   | 380    |
| 202156_s_at | CUGBP2   | CUG triplet repeat, RNA binding protein 2                         | N36    |
| 202172_at   | VEZF1    | vascular endothelial zinc finger 1                                | BG016  |
| 202125_s_at | TRAK2    | trafficking protein, kinesin binding 2                            | NM_049 |
| 202149_at   | NEDD9    | neural precursor cell expressed, developmentally down-regulated 9 | AL1339 |
| 201843_s_at | EFEMP1   | EGF-containing fibulin-like extracellular matrix protein 1        | NM_105 |
| 201957_at   | PPP1R12B | protein phosphatase 1, regulatory (inhibitor) subunit 12B         | AF388  |
| 201792_at   | AEBP1    | AE binding protein 1                                              | NM_129 |
| 201839_s_at | TACSTD1  | tumor-associated calcium signal transducer 1                      | NM_354 |
| 201753_s_at | ADD3     | adducin 3 (gamma)                                                 | NM_903 |
| 201787_at   | FBLN1    | fibulin 1                                                         | NM_996 |
| 201650_at   | KRT19    | keratin 19                                                        | NM_276 |
| 201719_s_at | EPB41L2  | erythrocyte membrane protein band 4.1-like 2                      | NM_431 |
| 201540_at   | FHL1     | four and a half LIM domains 1                                     | NM_449 |
| 201596_x_at | KRT18    | keratin 18                                                        | NM_224 |
| 201431_s_at | DPYSL3   | dihydropyrimidinase-like 3                                        | NM_387 |
| 201497_x_at | MYH11    | myosin, heavy chain 11, smooth muscle                             | NM_844 |
| 201307_at   | 11-Sep   | septin 11                                                         | AL572  |
| 201430_s_at | DPYSL3   | dihydropyrimidinase-like 3                                        | W72    |

|             |           |                                                                                  |        |
|-------------|-----------|----------------------------------------------------------------------------------|--------|
| 201150_s_at | TIMP3     | TIMP metalloproteinase inhibitor 3 (Sorsby fundus dystrophy, pseudoinflammatory) | NM_362 |
| 201280_s_at | DAB2      | disabled homolog 2, mitogen-responsive phosphoprotein (Drosophila)               | NM_343 |
| 201147_s_at | TIMP3     | TIMP metalloproteinase inhibitor 3 (Sorsby fundus dystrophy, pseudoinflammatory) | NM_362 |
| 201148_s_at | TIMP3     | TIMP metalloproteinase inhibitor 3 (Sorsby fundus dystrophy, pseudoinflammatory) | AW333  |
| 219398_at   | CIDEA     | cell death-inducing DFFA-like effector c                                         | NM_094 |
| 200962_at   | RPL31     | ribosomal protein L31                                                            | AI340  |
| 222288_at   |           |                                                                                  | AI009  |
| 205913_at   | PLIN      | perilipin                                                                        | NM_666 |
| 221795_at   | NTRK2     | neurotrophic tyrosine kinase, receptor, type 2                                   | AA799  |
| 221950_at   | EMX2      | empty spiracles homeobox 2                                                       | AI475  |
| 221470_s_at | IL1F7     | interleukin 1 family, member 7 (zeta)                                            | NM_439 |
| 221530_s_at | BHLHB3    | basic helix-loop-helix domain containing, class B, 3                             | AB088  |
| 219833_s_at | EFHC1     | EF-hand domain (C-terminal) containing 1                                         | NM_100 |
| 220559_at   | EN1       | engrailed homeobox 1                                                             | NM_426 |
| 219087_at   | ASPN      | asporin                                                                          | NM_680 |
| 219304_s_at | PDGFD     | platelet derived growth factor D                                                 | AB032  |
| 218820_at   | C14orf132 | chromosome 14 open reading frame 132                                             | NM_215 |

|             |           |                                                                |        |
|-------------|-----------|----------------------------------------------------------------|--------|
| 219064_at   | ITIH5     | inter-alpha (globulin) inhibitor H5                            | NM_569 |
| 218625_at   | NRN1      | neuritin 1                                                     | NM_588 |
| 218730_s_at | OGN       | osteoglycin                                                    | AF267  |
| 218418_s_at | ANKRD25   | ankyrin repeat domain 25                                       | NM_493 |
| 218546_at   | C1orf115  | chromosome 1 open reading frame 115                            | NM_709 |
| 218087_s_at | SORBS1    | sorbin and SH3 domain containing 1                             | N214   |
| 218312_s_at | ZSCAN18   | zinc finger and SCAN domain containing 18                      | NM_926 |
| 215303_at   |           |                                                                | BE061  |
| 217506_at   | LOC400642 | hypothetical gene supported by BC041875; BX648984              | H49    |
| 214151_s_at | CCPG1     | cell cycle progression 1                                       | AU143  |
| 214927_at   | ITGBL1    | integrin, beta-like 1 (with EGF-like repeat domains)           | AL352  |
| 213397_x_at | ANG       | angiogenin, ribonuclease, RNase A family, 5                    | AI768  |
| 213800_at   | CFH       | complement factor H                                            | X04    |
| 213071_at   | DPT       | dermatopontin                                                  | AL098  |
| 213156_at   |           |                                                                | BG221  |
| 212326_at   | VPS13D    | vacuolar protein sorting 13 homolog D ( <i>S. cerevisiae</i> ) | AB022  |
| 212850_s_at | LRP4      | low density lipoprotein receptor-related protein 4             | AA597  |
| 209894_at   | LEPR      | leptin receptor                                                | U50    |

|             |         |                                                                       |        |
|-------------|---------|-----------------------------------------------------------------------|--------|
|             |         |                                                                       |        |
| 211685_s_at | NCALD   | neurocalcin delta                                                     | AF261  |
| 209656_s_at | TMEM47  | transmembrane protein 47                                              | AL1350 |
| 209869_at   | ADRA2A  | adrenergic, alpha-2A-, receptor                                       | AF295  |
| 209543_s_at | CD34    | CD34 molecule                                                         | M81    |
| 209581_at   | HRASLS3 | HRAS-like suppressor 3                                                | BC087  |
| 207175_at   | ADIPOQ  | adiponectin, C1Q and collagen domain containing                       | NM_797 |
| 209356_x_at | EFEMP2  | EGF-containing fibulin-like extracellular matrix protein 2            | AB055  |
| 206167_s_at | ARHGAP6 | Rho GTPase activating protein 6                                       | NM_174 |
| 206227_at   | CILP    | cartilage intermediate layer protein, nucleotide pyrophosphohydrolase | NM_613 |
| 205549_at   | PCP4    | Purkinje cell protein 4                                               | NM_198 |
| 206149_at   | CHP2    | calcineurin B homologous protein 2                                    | NM_097 |
| 204963_at   | SSPN    | sarcospan (Kras oncogene-associated gene)                             | AL1356 |
| 205003_at   | DOCK4   | dedicator of cytokinesis 4                                            | NM_705 |
| 204591_at   | CHL1    | cell adhesion molecule with homology to L1CAM (close homolog of L1)   | NM_614 |

|             |         |                                               |        |
|-------------|---------|-----------------------------------------------|--------|
|             |         |                                               |        |
| 204939_s_at | PLN     | phospholamban                                 | NM_667 |
| 203980_at   | FABP4   | fatty acid binding protein 4, adipocyte       | NM_442 |
| 204589_at   | NUAK1   | NUAK family, SNF1-like kinase, 1              | NM_840 |
| 203824_at   | TSPAN8  | tetraspanin 8                                 | NM_616 |
|             |         |                                               |        |
| 203895_at   | PLCB4   | phospholipase C, beta 4                       | AL513  |
|             |         |                                               |        |
| 203548_s_at | LPL     | lipoprotein lipase                            | BF675  |
|             |         |                                               |        |
| 203549_s_at | LPL     | lipoprotein lipase                            | NM_237 |
|             |         |                                               |        |
| 202409_at   | IGF2    | insulin-like growth factor 2 (somatomedin A)  | X078   |
| 202973_x_at | FAM13A1 | family with sequence similarity 13, member A1 | NM_883 |
| 202274_     | ACTG2   | actin, gamma 2, smooth muscle, enteric        | NM_    |



|             |        |                                                                          |        |
|-------------|--------|--------------------------------------------------------------------------|--------|
| at          |        |                                                                          | 615    |
| 202363_at   | SPOCK1 | sparc/osteonectin, cwcv and kazal-like domains proteoglycan (testican) 1 | AF224  |
| 201496_x_at | MYH11  | myosin, heavy chain 11, smooth muscle                                    | NM_844 |
| 202052_s_at | RAI14  | retinoic acid induced 14                                                 | NM_577 |
| 217525_at   | OLFML1 | olfactomedin-like 1                                                      | AW397  |
| 201124_at   | ITGB5  | integrin, beta 5                                                         | AL023  |
| 204294_at   | AMT    | aminomethyltransferase                                                   | NM_481 |
| 204519_s_at | PLLP   | plasma membrane proteolipid (plasmolipin)                                | NM_993 |
| 65472_at    | USP39  | ubiquitin specific peptidase 39                                          | AI168  |
| 65718_at    | GPR124 | G protein-coupled receptor 124                                           | AI653  |
| 564_at      | GNA11  | guanine nucleotide binding protein (G protein), alpha 11 (Gq class)      | M69    |
| 57715_at    | FAM26B | family with sequence similarity 26, member B                             | W72    |
| 46256_at    | SPSB3  | splA/ryanodine receptor domain and SOCS box containing 3                 | AA570  |
| 48825_at    | ING4   | inhibitor of growth family, member 4                                     | AA883  |
| 41644_at    | SASH1  | SAM and SH3 domain containing 1                                          | AB033  |
| 45297_at    | EHD2   | EH-domain containing 2                                                   | AI417  |

|             |             |                                                                                          |        |
|-------------|-------------|------------------------------------------------------------------------------------------|--------|
|             |             |                                                                                          |        |
| 40446_at    | PHF1        | PHD finger protein 1                                                                     | AL0266 |
| 40837_at    | TLE2        | transducin-like enhancer of split 2 (E(sp1) homolog, Drosophila)                         | M99    |
| 36554_at    | ASMTL       | acetylserotonin O-methyltransferase-like                                                 | Y15    |
| 39313_at    | WNK1        | WNK lysine deficient protein kinase 1                                                    | AB042  |
| 36030_at    | HOM-TES-103 | hypothetical protein LOC25900                                                            | AL014  |
| 36553_at    | ASMTL       | acetylserotonin O-methyltransferase-like                                                 | AA699  |
| 222372_at   | MAGI1       | membrane associated guanylate kinase, WW and PDZ domain containing 1                     | AW948  |
| 32625_at    | NPR1        | natriuretic peptide receptor A/guanylate cyclase A (atrionatriuretic peptide receptor A) | X15    |
| 222362_at   | HRBL        | HIV-1 Rev binding protein-like                                                           | H07    |
| 222368_at   |             |                                                                                          | AW951  |
| 222266_at   | C19orf2     | chromosome 19 open reading frame 2                                                       | BF740  |
| 222282_at   | PAPD4       | PAP associated domain containing 4                                                       | AV753  |
| 222146_s_at | TCF4        | transcription factor 4                                                                   | AK074  |
| 222240_s_at | ISYNA1      | myo-inositol 1-phosphate synthase A1                                                     | AL149  |
| 222116_s_at | TBC1D16     | TBC1 domain family, member 16                                                            | AL185  |
| 222125_s_at | PH-4        | hypoxia-inducible factor prolyl 4-hydroxylase                                            | BC080  |

|             |         |                                                               |        |
|-------------|---------|---------------------------------------------------------------|--------|
| 222027_at   | NUCKS1  | nuclear casein kinase and cyclin-dependent kinase substrate 1 | AW543  |
| 222108_at   | AMIGO2  | adhesion molecule with Ig-like domain 2                       | AC010  |
| 221974_at   | PWCR1   | Prader-Willi syndrome chromosome region 1                     | AW748  |
| 222024_s_at | AKAP13  | A kinase (PRKA) anchor protein 13                             | AK014  |
| 221928_at   | ACACB   | acetyl-Coenzyme A carboxylase beta                            | AI057  |
| 221942_s_at | GUCY1A3 | guanylate cyclase 1, soluble, alpha 3                         | AI710  |
| 221870_at   | EHD2    | EH-domain containing 2                                        | AI417  |
| 221900_at   | COL8A2  | collagen, type VIII, alpha 2                                  | AI803  |
| 221748_s_at | TNS1    | tensin 1                                                      | AL0479 |
| 221864_at   | ORAI3   | ORAI calcium release-activated calcium modulator 3            | AW564  |
| 221718_s_at | AKAP13  | A kinase (PRKA) anchor protein 13                             | M90    |
| 221747_at   | TNS1    | tensin 1                                                      | AL0479 |
| 221646_s_at | ZDHHC11 | zinc finger, DHHC-type containing 11                          | AF259  |
| 221675_s_at | CHPT1   | choline phosphotransferase 1                                  | AF124  |

|             |           |                                                          |        |
|-------------|-----------|----------------------------------------------------------|--------|
|             |           |                                                          |        |
| 221565_s_at | FAM26B    | family with sequence similarity 26, member B             | BC039  |
| 221599_at   | C11orf67  | chromosome 11 open reading frame 67                      | BC052  |
| 221527_s_at | PARD3     | par-3 partitioning defective 3 homolog (C. elegans)      | AF185  |
| 221552_at   | ABHD6     | abhydrolase domain containing 6                          | BC098  |
| 221496_s_at | TOB2      | transducer of ERBB2, 2                                   | AL082  |
| 221523_s_at | RRAGD     | Ras-related GTP binding D                                | AL117  |
| 221016_s_at | TCF7L1    | transcription factor 7-like 1 (T-cell specific, HMG-box) | NM_283 |
| 221123_x_at | ZNF395    | zinc finger protein 395                                  | NM_660 |
| 220744_s_at | IFT122    | intraflagellar transport 122 homolog (Chlamydomonas)     | NM_262 |
| 220940_at   | KIAA1641  | KIAA1641                                                 | NM_190 |
| 220512_at   | DLC1      | deleted in liver cancer 1                                | NM_767 |
| 220609_at   | LOC202181 | hypothetical protein LOC202181                           | NM_651 |
| 220349_s_at | FLJ21865  | endo-beta-N-acetylglucosaminidase                        | NM_759 |

|             |           |                                                         |        |
|-------------|-----------|---------------------------------------------------------|--------|
|             |           |                                                         |        |
| 220432_s_at | CYP39A1   | cytochrome P450, family 39, subfamily A, polypeptide 1  | NM_593 |
| 220276_at   | FLJ22655  | hypothetical protein FLJ22655                           | NM_730 |
| 220327_at   | VGLL3     | vestigial like 3 (Drosophila)                           | NM_206 |
| 220184_at   | NANOG     | Nanog homeobox                                          | NM_865 |
| 220244_at   | LOH3CR2A  | loss of heterozygosity, 3, chromosomal region 2, gene A | NM_343 |
| 220065_at   | TNMD      | tenomodulin                                             | NM_144 |
| 220076_at   | ANKH      | ankylosis, progressive homolog (mouse)                  | NM_847 |
| 219999_at   | MAN2A2    | mannosidase, alpha, class 2A, member 2                  | NM_621 |
| 220016_at   | AHNAK     | AHNAK nucleoprotein                                     | NM_060 |
| 219909_at   | MMP28     | matrix metalloproteinase 28                             | NM_302 |
| 219957_at   | RUFY2     | RUN and FYVE domain containing 2                        | NM_987 |
| 219765_at   | ZNF329    | zinc finger protein 329                                 | NM_620 |
| 219848_s_at | ZNF432    | zinc finger protein 432                                 | NM_650 |
| 219561_at   | COPZ2     | coatamer protein complex, subunit zeta 2                | NM_429 |
| 219563_at   | C14orf139 | chromosome 14 open reading frame 139                    | NM_633 |
| 219517_at   | ELL3      | elongation factor RNA polymerase II-like 3              | NM_165 |
| 219534_at   | CDKN1C    | cyclin-dependent kinase inhibitor 1C (p57, Kip2)        | NM_165 |

|             |          |                                                                       |        |
|-------------|----------|-----------------------------------------------------------------------|--------|
| x_at        |          |                                                                       | 076    |
| 219468_s_at | CUEDC1   | CUE domain containing 1                                               | NM_949 |
| 219511_s_at | SNCAIP   | synuclein, alpha interacting protein (synphilin)                      | NM_460 |
| 219407_s_at | LAMC3    | laminin, gamma 3                                                      | NM_059 |
| 219429_at   | FA2H     | fatty acid 2-hydroxylase                                              | NM_306 |
| 219295_s_at | PCOLCE2  | procollagen C-endopeptidase enhancer 2                                | NM_363 |
| 219390_at   | FKBP14   | FK506 binding protein 14, 22 kDa                                      | NM_946 |
| 219229_at   | SLCO3A1  | solute carrier organic anion transporter family, member 3A1           | NM_272 |
| 219274_at   | TSPAN12  | tetraspanin 12                                                        | NM_338 |
| 219167_at   | RASL12   | RAS-like, family 12                                                   | NM_563 |
| 219195_at   | PPARGC1A | peroxisome proliferator-activated receptor gamma, coactivator 1 alpha | NM_261 |
| 219132_at   | PELI2    | pellino homolog 2 (Drosophila)                                        | NM_255 |
| 219140_s_at | RBP4     | retinol binding protein 4, plasma                                     | AF168  |
| 218974_at   | SOBP     | sine oculis binding protein homolog (Drosophila)                      | NM_013 |
| 219062_s_at | ZCCHC2   | zinc finger, CCHC domain containing 2                                 | BE643  |
| 218934_s_at | HSPB7    | heat shock 27kDa protein family, member 7 (cardiovascular)            | NM_424 |
| 218952_s_at | PCSK1N   | proprotein convertase subtilisin/kexin type 1 inhibitor               | NM_    |

|             |           |                                                            |        |
|-------------|-----------|------------------------------------------------------------|--------|
| at          |           |                                                            | 271    |
| 218665_at   | FZD4      | frizzled homolog 4 (Drosophila)                            | NM_193 |
| 218847_at   | IGF2BP2   | insulin-like growth factor 2 mRNA binding protein 2        | NM_548 |
| 218641_at   | MGC3032   | hypothetical protein MGC3032                               | NM_941 |
| 218651_s_at | LARP6     | La ribonucleoprotein domain family, member 6               | NM_357 |
| 218574_s_at | LMCD1     | LIM and cysteine-rich domains 1                            | NM_583 |
| 218624_s_at | MGC2752   | hypothetical protein MGC2752                               | NM_939 |
| 218486_at   | KLF11     | Kruppel-like factor 11                                     | AA1_94 |
| 218517_at   | PHF17     | PHD finger protein 17                                      | NM_900 |
| 218437_s_at | LZTFL1    | leucine zipper transcription factor-like 1                 | AA8_32 |
| 218450_at   | HEBP1     | heme binding protein 1                                     | NM_987 |
| 218164_at   | SPATA20   | spermatogenesis associated 20                              | NM_827 |
| 218168_s_at | CABC1     | chaperone, ABC1 activity of bc1 complex homolog (S. pombe) | NM_247 |
| 218086_at   | NPDC1     | neural proliferation, differentiation and control, 1       | NM_392 |
| 218149_s_at | ZNF395    | zinc finger protein 395                                    | NM_606 |
| 217897_at   | FXVD6     | FXVD domain containing ion transport regulator 6           | NM_003 |
| 217974_at   | TM7SF3    | transmembrane 7 superfamily member 3                       | NM_551 |
| 217667_at   | LOC729799 | similar to SEC14-like protein 1                            | AV7_14 |
| 217734_s_at | WDR6      | WD repeat domain 6                                         | NM_031 |
| 217437_s_at | TACC1     | transforming, acidic coiled-coil containing protein 1      | AB0_26 |
| 217627_at   | ZNF573    | zinc finger protein 573                                    | BE5_46 |
| 217226_s_at | SFXN3     | sideroflexin 3                                             | M95    |

|                 |          |                                                                       |       |
|-----------------|----------|-----------------------------------------------------------------------|-------|
| 217257_<br>at   |          |                                                                       | L371  |
| 217087_<br>at   | C1orf68  | chromosome 1 open reading frame 68                                    | AF081 |
| 217164_<br>at   |          |                                                                       | AK008 |
| 216331_<br>at   | ITGA7    | integrin, alpha 7                                                     | AK048 |
| 216614_<br>at   | ITPR2    | inositol 1,4,5-triphosphate receptor, type 2                          | AL088 |
| 216080_<br>s_at | FADS3    | fatty acid desaturase 3                                               | AC070 |
| 216264_<br>s_at | LAMB2    | laminin, beta 2 (laminin S)                                           | X79   |
| 215768_<br>at   | SOX5     | SRY (sex determining region Y)-box 5                                  | AL037 |
| 216000_<br>at   | KIAA0484 | KIAA0484 protein                                                      | AA795 |
| 215617_<br>at   |          |                                                                       | AU111 |
| 215695_<br>s_at | GYG2     | glycogenin 2                                                          | U94   |
| 215537_<br>x_at | DDAH2    | dimethylarginine dimethylaminohydrolase 2                             | AJ08  |
| 215567_<br>at   | FCF1     | FCF1 small subunit (SSU) processome component homolog (S. cerevisiae) | AU119 |



|             |              |                                                                     |       |
|-------------|--------------|---------------------------------------------------------------------|-------|
| 215235_at   | SPTAN1       | spectrin, alpha, non-erythrocytic 1 (alpha-fodrin)                  | AL173 |
| 215358_x_at | ZNF37B       | zinc finger protein 37B                                             | AK080 |
| 215139_at   | ARHGEF10     | Rho guanine nucleotide exchange factor (GEF) 10                     | AL108 |
| 215146_s_at | TTC28        | tetratricopeptide repeat domain 28                                  | AB066 |
| 215066_at   | PTPRF        | protein tyrosine phosphatase, receptor type, F                      | AU143 |
| 215129_at   | PIK3C2G      | phosphoinositide-3-kinase, class 2, gamma polypeptide               | AJ008 |
| 214967_at   | SAMD4A       | sterile alpha motif domain containing 4A                            | AU183 |
| 215016_x_at | DST          | dystonin                                                            | BC012 |
| 214920_at   | THSD7A       | thrombospondin, type I, domain containing 7A                        | R33   |
| 214925_s_at | SPTAN1       | spectrin, alpha, non-erythrocytic 1 (alpha-fodrin)                  | AK084 |
| 214890_s_at | DKFZP564J102 | DKFZP564J102 protein                                                | AL065 |
| 214909_s_at | DDAH2        | dimethylarginine dimethylaminohydrolase 2                           | AK091 |
| 214783_s_at | ANXA11       | annexin A11                                                         | BG120 |
| 214808_at   |              |                                                                     | AU151 |
| 214734_at   | EXPH5        | exophilin 5                                                         | AB024 |
| 214739_at   | LRCH3        | leucine-rich repeats and calponin homology (CH) domain containing 3 | AI359 |
| 214598_at   | CLDN8        | claudin 8                                                           | AL077 |

|             |           |                                                                                        |        |
|-------------|-----------|----------------------------------------------------------------------------------------|--------|
|             |           |                                                                                        |        |
| 214682_at   | LOC399491 | LOC399491 protein                                                                      | AK076  |
| 214454_at   | ADAMTS2   | ADAM metalloproteinase with thrombospondin type 1 motif, 2                             | NM_244 |
| 214464_at   | CDC42BPA  | CDC42 binding protein kinase alpha (DMPK-like)                                         | NM_607 |
| 214415_at   | PLGLB1    | plasminogen-like B1                                                                    | N58    |
| 214434_at   | HSPA12A   | heat shock 70kDa protein 12A                                                           | AB077  |
| 214247_s_at | DKK3      | dickkopf homolog 3 ( <i>Xenopus laevis</i> )                                           | AU157  |
| 214395_x_at | EEF1D     | eukaryotic translation elongation factor 1 delta (guanine nucleotide exchange protein) | AI613  |
| 214234_s_at | CYP3A5P2  | cytochrome P450, family 3, subfamily A, polypeptide 5 pseudogene 2                     | X903   |
| 214239_x_at | CISD3     | CDGSH iron sulfur domain 3                                                             | AI565  |
| 214188_at   | HEXIM1    | hexamethylene bis-acetamide inducible 1                                                | AW696  |
| 214212_x_at | PLEKHC1   | pleckstrin homology domain containing, family C (with FERM domain) member 1            | AI921  |
| 214156_at   | MYRIP     | myosin VIIA and Rab interacting protein                                                | AL090  |
| 214175_x_at | PDLIM4    | PDZ and LIM domain 4                                                                   | AI257  |
| 214041_x_at | RPL37A    | ribosomal protein L37a                                                                 | BE872  |
| 214110_s_at | LOC654342 | similar to lymphocyte-specific protein 1                                               | BF104  |
| 214021_x_at | ITGB5     | integrin, beta 5                                                                       | AI338  |

|             |               |                                                                        |       |
|-------------|---------------|------------------------------------------------------------------------|-------|
| 214036_at   |               |                                                                        | BE499 |
| 213982_s_at | RABGAP1L      | RAB GTPase activating protein 1-like                                   | BG103 |
| 214001_x_at | RPS10         | ribosomal protein S10                                                  | AW347 |
| 213931_at   | ID2           | inhibitor of DNA binding 2, dominant negative helix-loop-helix protein | AI818 |
| 213942_at   | MEGF6         | multiple EGF-like-domains 6                                            | AL103 |
| 213924_at   | MPPE1         | metallophosphoesterase 1                                               | BF402 |
| 213925_at   | C1orf95       | chromosome 1 open reading frame 95                                     | AL112 |
| 213900_at   | C9orf61       | chromosome 9 open reading frame 61                                     | AA529 |
| 213905_x_at | BGN           | biglycan                                                               | AA858 |
| 213792_s_at |               |                                                                        | AA408 |
| 213891_s_at | TCF4          | transcription factor 4                                                 | AI927 |
| 213705_at   |               |                                                                        | AW361 |
| 213706_at   | GPD1          | glycerol-3-phosphate dehydrogenase 1 (soluble)                         | AI368 |
| 213686_at   | VPS13A        | vacuolar protein sorting 13 homolog A (S. cerevisiae)                  | AI185 |
| 213693_s_at | MUC1          | mucin 1, cell surface associated                                       | AI619 |
| 213661_at   | DKFZP586H2123 | regeneration associated muscle protease                                | AI676 |
| 213668_s_at | SOX4          | SRY (sex determining region Y)-box 4                                   | AI987 |
| 213605_s_at | LOC728411     | similar to Beta-glucuronidase precursor                                | AL087 |
| 213657_s_at | ZNF710        | zinc finger protein 710                                                | BE894 |
| 213587_s_at | ATP6V0E2      | ATPase, H+ transporting V0 subunit e2                                  | AI887 |
| 213592_at   | AGTRL1        | angiotensin II receptor-like 1                                         | X892  |

|             |           |                                                               |        |
|-------------|-----------|---------------------------------------------------------------|--------|
| 213489_at   | MAPRE2    | microtubule-associated protein, RP/EB family, member 2        | BE656  |
| 213543_at   |           |                                                               | AA553  |
| 213388_at   | LOC727942 | similar to phosphodiesterase 4D interacting protein isoform 2 | H15    |
| 213455_at   | FAM114A1  | family with sequence similarity 114, member A1                | W87    |
| 213351_s_at | TMCC1     | transmembrane and coiled-coil domain family 1                 | AB022  |
| 213371_at   | LDB3      | LIM domain binding 3                                          | AI802  |
| 213329_at   | SRGAP2    | SLIT-ROBO Rho GTPase activating protein 2                     | AA761  |
| 213350_at   | RPS11     | ribosomal protein S11                                         | BF655  |
| 213317_at   | CLIC5     | chloride intracellular channel 5                              | AL0413 |
| 213326_at   | VAMP1     | vesicle-associated membrane protein 1 (synaptobrevin 1)       | AU119  |
| 213260_at   |           |                                                               | AU190  |
| 213316_at   | KIAA1462  | KIAA1462                                                      | AL054  |
| 213183_s_at | CDKN1C    | cyclin-dependent kinase inhibitor 1C (p57, Kip2)              | N95    |
| 213249_at   | FBXL7     | F-box and leucine-rich repeat protein 7                       | AU127  |
| 213116_at   | NEK3      | NIMA (never in mitosis gene a)-related kinase 3               | AI190  |
| 213182_x_at | CDKN1C    | cyclin-dependent kinase inhibitor 1C (p57, Kip2)              | R78    |
| 213030_s_at | PLXNA2    | plexin A2                                                     | AI688  |
| 213089_at   | GUSBP1    | glucuronidase, beta pseudogene 1                              | AU190  |
| 213010_at   | PRKCDBP   | protein kinase C, delta binding protein                       | AI082  |
| 213029_at   | NFIB      | nuclear factor I/B                                            | BG428  |

|                 |          |                                                               |        |
|-----------------|----------|---------------------------------------------------------------|--------|
| 212991_<br>at   | FBXO9    | F-box protein 9                                               | AL0378 |
| 212993_<br>at   |          |                                                               | AA166  |
| 212923_<br>s_at | C6orf145 | chromosome 6 open reading frame 145                           | AK028  |
| 212970_<br>at   |          |                                                               | AI693  |
| 212913_<br>at   | C6orf26  | chromosome 6 open reading frame 26                            | BE660  |
| 212915_<br>at   | PDZRN3   | PDZ domain containing RING finger 3                           | AL504  |
| 212822_<br>at   | HEG1     | HEG homolog 1 (zebrafish)                                     | AA102  |
| 212875_<br>s_at | C21orf25 | chromosome 21 open reading frame 25                           | AP045  |
| 212775_<br>at   | OBSL1    | obscurin-like 1                                               | AI973  |
| 212813_<br>at   | JAM3     | junctional adhesion molecule 3                                | AA144  |
| 212647_<br>at   | RRAS     | related RAS viral (r-ras) oncogene homolog                    | NM270  |
| 212651_<br>at   | RHOBTB1  | Rho-related BTB domain containing 1                           | AB083  |
| 212567_<br>s_at | MAP4     | microtubule-associated protein 4                              | AL510  |
| 212594_<br>at   | PDCD4    | programmed cell death 4 (neoplastic transformation inhibitor) | AI180  |
| 212510_<br>at   | GPD1L    | glycerol-3-phosphate dehydrogenase 1-like                     | AA122  |
| 212518_<br>at   | PIP5K1C  | phosphatidylinositol-4-phosphate 5-kinase, type I, gamma      | AB061  |

|             |          |                                                             |       |
|-------------|----------|-------------------------------------------------------------|-------|
|             |          |                                                             |       |
| 212498_at   |          |                                                             | AF033 |
| 212509_s_at | MXRA7    | matrix-remodelling associated 7                             | BF934 |
| 212483_at   | NIPBL    | Nipped-B homolog (Drosophila)                               | AB094 |
| 212494_at   | TENC1    | tensin like C1 domain containing phosphatase (tensin 2)     | AB098 |
| 212427_at   | KIAA0368 | KIAA0368                                                    | AB066 |
| 212468_at   | SPAG9    | sperm associated antigen 9                                  | AK012 |
| 212346_s_at | MXD4     | MAX dimerization protein 4                                  | AK092 |
| 212372_at   | MYH10    | myosin, heavy chain 10, non-muscle                          | AK077 |
| 212254_s_at | DST      | dystonin                                                    | AI790 |
| 212328_at   | LIMCH1   | LIM and calponin homology domains 1                         | AB025 |
| 212226_s_at | PPAP2B   | phosphatidic acid phosphatase type 2B                       | AA686 |
| 212240_s_at | PIK3R1   | phosphoinositide-3-kinase, regulatory subunit 1 (p85 alpha) | AI678 |

|             |      |                                |       |
|-------------|------|--------------------------------|-------|
|             |      |                                |       |
| 212104_s_at | RBM9 | RNA binding motif protein 9    | N95   |
| 212151_at   | PBX1 | pre-B-cell leukemia homeobox 1 | BF998 |

|             |           |                                                                                        |       |
|-------------|-----------|----------------------------------------------------------------------------------------|-------|
|             |           |                                                                                        |       |
| 212080_at   | MLL       | myeloid/lymphoid or mixed-lineage leukemia (trithorax homolog, Drosophila)             | AV729 |
| 212097_at   | CAV1      | caveolin 1, caveolae protein, 22kDa                                                    | AU199 |
| 211998_at   | H3F3B     | H3 histone, family 3B (H3.3B)                                                          | Z489  |
| 212071_s_at | SPTBN1    | spectrin, beta, non-erythrocytic 1                                                     | BE933 |
| 211841_s_at | TNFRSF25  | tumor necrosis factor receptor superfamily, member 25                                  | U944  |
| 211959_at   | IGFBP5    | insulin-like growth factor binding protein 5                                           | AWC32 |
| 211538_s_at | HSPA2     | heat shock 70kDa protein 2                                                             | U561  |
| 211564_s_at | PDLIM4    | PDZ and LIM domain 4                                                                   | BC096 |
| 211458_s_at | GABARAPL3 | GABA(A) receptors associated protein like 3                                            | AF119 |
| 211535_s_at | FGFR1     | fibroblast growth factor receptor 1 (fms-related tyrosine kinase 2, Pfeiffer syndrome) | M601  |
| 210987_x_at | TPM1      | tropomyosin 1 (alpha)                                                                  | M19   |
| 211026_s_at | MGLL      | monoglyceride lipase                                                                   | BC030 |
| 210778_s_at | MXD4      | MAX dimerization protein 4                                                             | BC013 |
| 210946_     | PPAP2A    | phosphatidic acid phosphatase type 2A                                                  | AF0   |



|             |         |                                                                          |       |
|-------------|---------|--------------------------------------------------------------------------|-------|
| at          |         |                                                                          | 03    |
| 210511_s_at | INHBA   | inhibin, beta A                                                          | M13   |
| 210762_s_at | DLC1    | deleted in liver cancer 1                                                | AF019 |
| 210078_s_at | KCNAB1  | potassium voltage-gated channel, shaker-related subfamily, beta member 1 | L398  |
| 210139_s_at | PMP22   | peripheral myelin protein 22                                             | L032  |
| 210051_at   | RAPGEF3 | Rap guanine nucleotide exchange factor (GEF) 3                           | U78   |
| 210069_at   | CPT1B   | carnitine palmitoyltransferase 1B (muscle)                               | U62   |
| 209866_s_at | LPHN3   | latrophilin 3                                                            | AF380 |
| 210002_at   | GATA6   | GATA binding protein 6                                                   | D87   |
| 209782_s_at | DBP     | D site of albumin promoter (albumin D-box) binding protein               | U79   |

|             |        |                                                            |       |
|-------------|--------|------------------------------------------------------------|-------|
| s_at        |        |                                                            |       |
| 209842_at   | SOX10  | SRY (sex determining region Y)-box 10                      | AI369 |
| 209621_s_at | PDLIM3 | PDZ and LIM domain 3                                       | AF080 |
| 209663_s_at | ITGA7  | integrin, alpha 7                                          | AF032 |
| 209604_s_at | GATA3  | GATA binding protein 3                                     | AI799 |
| 209616_s_at | CES1   | carboxylesterase 1 (monocyte/macrophage serine esterase 1) | S73   |
| 209602_s_at | GATA3  | GATA binding protein 3                                     | AI799 |
| 209603_at   | GATA3  | GATA binding protein 3                                     | AI799 |
| 209561_at   | THBS3  | thrombospondin 3                                           | L389  |
| 209590_at   | BMP7   | bone morphogenetic protein 7 (osteogenic protein 1)        | AL14  |
| 209534_x_at | AKAP13 | A kinase (PRKA) anchor protein 13                          | BF223 |

|             |         |                                                         |       |
|-------------|---------|---------------------------------------------------------|-------|
|             |         |                                                         |       |
| 209539_at   | ARHGEF6 | Rac/Cdc42 guanine nucleotide exchange factor (GEF) 6    | D25   |
| 209496_at   | RARRES2 | retinoic acid receptor responder (tazarotene induced) 2 | BC069 |
| 209522_s_at | CRAT    | carnitine acetyltransferase                             | BC023 |
| 209431_s_at | PATZ1   | POZ (BTB) and AT hook containing zinc finger 1          | AF283 |
| 209487_at   | RBPMS   | RNA binding protein with multiple splicing              | D84   |
|             |         |                                                         |       |
| 209355_s_at | PPAP2B  | phosphatidic acid phosphatase type 2B                   | AB089 |
| 209375_at   | XPC     | xeroderma pigmentosum, complementation group C          | D21   |
| 209285_s_at | C3orf63 | chromosome 3 open reading frame 63                      | N38   |
| 209289_at   | NFIB    | nuclear factor I/B                                      | AI708 |
| 209264_s_at | TSPAN4  | tetraspanin 4                                           | AF041 |
|             |         |                                                         |       |
| 209283_at   | CRYAB   | crystallin, alpha B                                     | AF062 |
|             |         |                                                         |       |
| 209185_s_at | IRS2    | insulin receptor substrate 2                            | AF010 |
| 209263_x_at | TSPAN4  | tetraspanin 4                                           | BC089 |
|             |         |                                                         |       |
| 33850_at    | MAP4    | microtubule-associated protein 4                        | W28   |
| 35776_at    | ITSN1   | intersectin 1 (SH3 domain protein)                      | AF043 |

|             |           |                                                      |       |
|-------------|-----------|------------------------------------------------------|-------|
|             |           |                                                      |       |
| 222043_at   | CLU       | clusterin                                            | AI984 |
| 32259_at    | EZH1      | enhancer of zeste homolog 1 (Drosophila)             | AB086 |
| 212706_at   | RASA4     | RAS p21 protein activator 4                          | AI731 |
| 214298_x_at | 6-Sep     | septin 6                                             | AL574 |
| 208868_s_at | GABARAPL1 | GABA(A) receptor-associated protein like 1           | BF156 |
| 209596_at   | MXRA5     | matrix-remodelling associated 5                      | AF205 |
| 202259_s_at | PFAAP5    | phosphonoformate immuno-associated protein 5         | NM887 |
| 202992_at   | C7        | complement component 7                               | NM587 |
| 209612_s_at | ADH1B     | alcohol dehydrogenase IB (class I), beta polypeptide | M24   |
| 209613_s_at | ADH1B     | alcohol dehydrogenase IB (class I), beta polypeptide | M21   |

|                 |               |                                                                                                   |        |
|-----------------|---------------|---------------------------------------------------------------------------------------------------|--------|
| 203240_<br>at   | FCGBP         | Fc fragment of IgG binding protein                                                                | NM_890 |
| 205357_<br>s_at | AGTR1         | angiotensin II receptor, type 1                                                                   | NM_685 |
| 202073_<br>at   | OPTN          | optineurin                                                                                        | AV775  |
| 210113_<br>s_at | NLRP1         | NLR family, pyrin domain containing 1                                                             | AF305  |
| 210102_<br>at   | LOH11CR2<br>A | loss of heterozygosity, 11, chromosomal region 2, gene A                                          | BC034  |
| 213258_<br>at   | TFPI          | tissue factor pathway inhibitor (lipoprotein-associated coagulation inhibitor)                    | BF531  |
| 204639_<br>at   | ADA           | adenosine deaminase                                                                               | NM_022 |
| 205079_<br>s_at | MPDZ          | multiple PDZ domain protein                                                                       | NM_829 |
| 201009_<br>s_at | TXNIP         | thioredoxin interacting protein                                                                   | NM_472 |
| 201034_<br>at   | ADD3          | adducin 3 (gamma)                                                                                 | BE556  |
| 221511_<br>x_at | CCPG1         | cell cycle progression 1                                                                          | AF228  |
| 221564_<br>at   | PRMT2         | protein arginine methyltransferase 2                                                              | AL594  |
| 217707_<br>x_at | SMARCA2       | SWI/SNF related, matrix associated, actin dependent regulator of chromatin, subfamily a, member 2 | AI533  |

|             |         |                                                                            |        |
|-------------|---------|----------------------------------------------------------------------------|--------|
|             |         |                                                                            |        |
| 219935_at   | ADAMTS5 | ADAM metalloproteinase with thrombospondin type 1 motif, 5 (aggrecanase-2) | NM_038 |
| 213375_s_at | CG018   | hypothetical gene CG018                                                    | N80    |
| 217047_s_at | FAM13A1 | family with sequence similarity 13, member A1                              | AK038  |
| 218613_at   | PSD3    | pleckstrin and Sec7 domain containing 3                                    | NM_422 |
| 222156_x_at | CCPG1   | cell cycle progression 1                                                   | AK059  |
| 213306_at   | MPDZ    | multiple PDZ domain protein                                                | AA999  |
| 213429_at   |         |                                                                            | AW079  |
|             |         |                                                                            |        |
| 203603_s_at | ZEB2    | zinc finger E-box binding homeobox 2                                       | NM_795 |
| 204796_at   | EML1    | echinoderm microtubule associated protein like 1                           | NM_434 |
| 201801_s_at | SLC29A1 | solute carrier family 29 (nucleoside transporters), member 1               | NM_955 |
|             |         |                                                                            |        |
| 201117_s_at | CPE     | carboxypeptidase E                                                         | NM_873 |
| 219317_at   | POLI    | polymerase (DNA directed) iota                                             | NM_195 |
| 219908_at   | DKK2    | dickkopf homolog 2 ( <i>Xenopus laevis</i> )                               | NM_421 |
| 213068_at   | DPT     | dermatopontin                                                              | AI148  |
|             |         |                                                                            |        |
| 213880_at   | LGR5    | leucine-rich repeat-containing G protein-coupled receptor 5                | AL520  |
| 207977_s_at | DPT     | dermatopontin                                                              | NM_937 |
|             |         |                                                                            |        |
| 209199_s_at | MEF2C   | myocyte enhancer factor 2C                                                 | L08    |
| 204017_at   | KDEL3   | KDEL (Lys-Asp-Glu-Leu) endoplasmic reticulum protein retention receptor 3  | NM_855 |
| 205407_at   | RECK    | reversion-inducing-cysteine-rich protein with kazal motifs                 | NM_111 |

|             |         |                                                                                        |        |
|-------------|---------|----------------------------------------------------------------------------------------|--------|
| 212486_s_at | FYN     | FYN oncogene related to SRC, FGR, YES                                                  | N20    |
| 220783_at   | MMP27   | matrix metalloproteinase 27                                                            | NM_122 |
| 202321_at   | GGPS1   | geranylgeranyl diphosphate synthase 1                                                  | AW207  |
| 213125_at   | OLFML2B | olfactomedin-like 2B                                                                   | AWC73  |
| 212148_at   | PBX1    | pre-B-cell leukemia homeobox 1                                                         | AL0481 |
| 212310_at   | MIA3    | melanoma inhibitory activity family, member 3                                          | D87    |
| 205158_at   | RNASE4  | ribonuclease, RNase A family, 4                                                        | NM_937 |
| 212730_at   | DMN     | desmuslin                                                                              | AK020  |
| 221024_s_at | SLC2A10 | solute carrier family 2 (facilitated glucose transporter), member 10                   | NM_777 |
| 221833_at   | LONP2   | lon peptidase 2, peroxisomal                                                           | AV732  |
| 219243_at   | GIMAP4  | GTPase, IMAP family member 4                                                           | NM_326 |
| 219689_at   | SEMA3G  | sema domain, immunoglobulin domain (Ig), short basic domain, secreted, (semaphorin) 3G | NM_163 |
| 203501_at   | PGCP    | plasma glutamate carboxypeptidase                                                      | NM_102 |
| 203801_at   | MRPS14  | mitochondrial ribosomal protein S14                                                    | BG253  |

|             |          |                                                                                                     |        |
|-------------|----------|-----------------------------------------------------------------------------------------------------|--------|
| 206101_at   | ECM2     | extracellular matrix protein 2, female organ and adipocyte specific                                 | NM_393 |
| 204755_x_at | HLF      | hepatic leukemia factor                                                                             | NM_126 |
| 215239_x_at | ZNF273   | zinc finger protein 273                                                                             | AU189  |
| 218370_s_at | S100PBP  | S100P binding protein                                                                               | NM_753 |
| 213150_at   | HOXA10   | homeobox A10                                                                                        | BF717  |
| 213158_at   |          |                                                                                                     | BG221  |
| 221756_at   | PIK3IP1  | phosphoinositide-3-kinase interacting protein 1                                                     | BE076  |
| 211732_x_at | HNMT     | histamine N-methyltransferase                                                                       | BC007  |
| 213247_at   | SVEP1    | sushi, von Willebrand factor type A, EGF and pentraxin domain containing 1                          | AA707  |
| 213435_at   | SATB2    | SATB homeobox 2                                                                                     | AB057  |
| 207714_s_at | SERPINH1 | serpin peptidase inhibitor, clade H (heat shock protein 47), member 1, (collagen binding protein 1) | NM_353 |
| 209466_x_at | PTN      | pleiotrophin (heparin binding growth factor 8, neurite growth-promoting factor 1)                   | M57    |
| 219427_at   | FAT4     | FAT tumor suppressor homolog 4 (Drosophila)                                                         | NM_582 |
| 219895_at   | FAM70A   | family with sequence similarity 70, member A                                                        | NM_938 |
| 222316_at   | VDP      | vesicle docking protein p115                                                                        | AW953  |
| 49452_at    | ACACB    | acetyl-Coenzyme A carboxylase beta                                                                  | AI057  |
| 61734_at    | RCN3     | reticulocalbin 3, EF-hand calcium binding domain                                                    | AI794  |
| 201278_at   | DAB2     | disabled homolog 2, mitogen-responsive phosphoprotein (Drosophila)                                  | N21    |



|             |         |                                                                                                  |        |
|-------------|---------|--------------------------------------------------------------------------------------------------|--------|
| 220351_at   | CCRL1   | chemokine (C-C motif) receptor-like 1                                                            | NM_557 |
| 220988_s_at | C1QTNF3 | C1q and tumor necrosis factor related protein 3                                                  | NM_945 |
| 214954_at   | SUSD5   | sushi domain containing 5                                                                        | BF937  |
| 218162_at   | OLFML3  | olfactomedin-like 3                                                                              | NM_190 |
| 212865_s_at | COL14A1 | collagen, type XIV, alpha 1 (undulin)                                                            | BF463  |
| 213909_at   | LRRC15  | leucine rich repeat containing 15                                                                | AU199  |
| 210298_x_at | FHL1    | four and a half LIM domains 1                                                                    | AF018  |
| 210571_s_at | CMAH    | cytidine monophosphate-N-acetylneuraminic acid hydroxylase (CMP-N-acetylneuramate monooxygenase) | AF080  |
| 209465_x_at | PTN     | pleiotrophin (heparin binding growth factor 8, neurite growth-promoting factor 1)                | AL512  |
| 209501_at   | CDR2    | cerebellar degeneration-related protein 2, 62kDa                                                 | AL514  |
| 205857_at   | SLC18A2 | solute carrier family 18 (vesicular monoamine), member 2                                         | AI260  |
| 206726_at   | PGDS    | prostaglandin D2 synthase, hematopoietic                                                         | NM_485 |
| 205422_s_at | ITGBL1  | integrin, beta-like 1 (with EGF-like repeat domains)                                             | NM_791 |
| 205803_s_at | TRPC1   | transient receptor potential cation channel, subfamily C, member 1                               | NM_304 |
| 205051_s_at | KIT     | v-kit Hardy-Zuckerman 4 feline sarcoma viral oncogene homolog                                    | NM_222 |
| 205382_s_at | CFD     | complement factor D (adipsin)                                                                    | NM_928 |
| 204154_at   | CDO1    | cysteine dioxygenase, type I                                                                     | NM_801 |

|             |         |                                                                                                   |        |
|-------------|---------|---------------------------------------------------------------------------------------------------|--------|
| 204160_s_at | ENPP4   | ectonucleotide pyrophosphatase/phosphodiesterase 4 (putative function)                            | NM_936 |
| 203874_s_at | SMARCA1 | SWI/SNF related, matrix associated, actin dependent regulator of chromatin, subfamily a, member 1 | M88    |
| 203886_s_at | FBLN2   | fibulin 2                                                                                         | NM_998 |
| 211737_x_at | PTN     | pleiotrophin (heparin binding growth factor 8, neurite growth-promoting factor 1)                 | BC016  |
| 212670_at   | ELN     | elastin (supravalvular aortic stenosis, Williams-Beuren syndrome)                                 | AA478  |
| 209406_at   | BAG2    | BCL2-associated athanogene 2                                                                      | AF092  |
| 211062_s_at | CPZ     | carboxypeptidase Z                                                                                | BC093  |
| 205498_at   | GHR     | growth hormone receptor                                                                           | NM_163 |
| 205907_s_at | OMD     | osteomodulin                                                                                      | AI769  |
| 202733_at   | P4HA2   | procollagen-proline, 2-oxoglutarate 4-dioxygenase (proline 4-hydroxylase), alpha polypeptide II   | NM_199 |
| 207543_s_at | P4HA1   | procollagen-proline, 2-oxoglutarate 4-dioxygenase (proline 4-hydroxylase), alpha polypeptide I    | NM_917 |
| 219284_at   | HSPBAP1 | HSPB (heat shock 27kDa) associated protein 1                                                      | NM_610 |
| 220711_at   |         |                                                                                                   | NM_978 |

**GENES MODULATED DIFFERENTLY IN RESPONDERS AND NON-RES**

|                |                                                                             |
|----------------|-----------------------------------------------------------------------------|
| <b>R_0</b>     | Mean expression value estimate (Log2) for Responders in LS skin             |
| <b>R_1</b>     | Mean expression value estimate (Log2) for Responders in LS at Wk 1          |
| <b>R_2</b>     | Mean expression value estimate (Log2) for Responders in LS at Wk 2          |
| <b>R_4</b>     | Mean expression value estimate (Log2) for Responders in LS at Wk 4          |
| <b>R_12</b>    | Mean expression value estimate (Log2) for Responders in LS at Wk 12         |
| <b>R_NL</b>    | Mean expression value estimate (Log2) for Responders in NL skin at baseline |
| <b>NR_0</b>    | Mean expression value estimate (Log2) for Non-Responders in LS skin         |
| <b>NR_1</b>    | Mean expression value estimate (Log2) for Non-Responders in LS at Wk 1      |
| <b>NR_2</b>    | Mean expression value estimate (Log2) for Non-Responders in LS at Wk 2      |
| <b>NR_4</b>    | Mean expression value estimate (Log2) for Non-Responders in LS at Wk 4      |
| <b>NR_12</b>   | Mean expression value estimate (Log2) for Non-Responders in LS at Wk 12     |
| <b>NR_NL</b>   | Mean expression value estimate (Log2) for Non-Responders in LS at Wk 12     |
| <b>Cluster</b> | Final cluster membership                                                    |

| <b>Probe</b> | <b>Symbol</b> | <b>Description</b>                                                          |
|--------------|---------------|-----------------------------------------------------------------------------|
| 208018_s_at  | HCK           | hemopoietic cell kinase                                                     |
| 203058_s_at  | PAPSS2        | 3'-phosphoadenosine 5'-phosphosulfate synthase 2                            |
| 208813_at    | GOT1          | glutamic-oxaloacetic transaminase 1, soluble (aspartate aminotransferase 1) |

|             |         |                                                                                                |
|-------------|---------|------------------------------------------------------------------------------------------------|
|             |         |                                                                                                |
| 219198_at   | GTF3C4  | general transcription factor IIIC, polypeptide 4, 90kDa                                        |
| 219956_at   | GALNT6  | UDP-N-acetyl-alpha-D-galactosamine:polypeptide N-acetylgalactosaminyltransferase 6 (GalNAc-T6) |
| 206562_s_at | CSNK1A1 | casein kinase 1, alpha 1                                                                       |
| 206643_at   | HAL     | histidine ammonia-lyase                                                                        |
| 206036_s_at | REL     | v-rel reticuloendotheliosis viral oncogene homolog (avian)                                     |
| 206125_s_at | KLK8    | kallikrein-related peptidase 8                                                                 |
| 204331_s_at | MRPS12  | mitochondrial ribosomal protein S12                                                            |
| 205064_at   | SPRR1B  | small proline-rich protein 1B (cornifin)                                                       |
| 204174_at   | ALOX5AP | arachidonate 5-lipoxygenase-activating protein                                                 |
| 204203_at   | CEBPG   | CCAAT/enhancer binding protein (C/EBP), gamma                                                  |

|             |              |                                                                |
|-------------|--------------|----------------------------------------------------------------|
|             |              |                                                                |
| 203740_at   | MPHOSP<br>H6 | M-phase phosphoprotein 6                                       |
| 203888_at   | THBD         | thrombomodulin                                                 |
| 202917_s_at | S100A8       | S100 calcium binding protein A8                                |
| 203535_at   | S100A9       | S100 calcium binding protein A9                                |
| 202264_s_at | TOMM40       | translocase of outer mitochondrial membrane 40 homolog (yeast) |
| 202787_s_at | MAPKAPK<br>3 | mitogen-activated protein kinase-activated protein kinase 3    |
| 201516_at   | SRM          | spermidine synthase                                            |
| 201912_s_at | GSPT1        | G1 to S phase transition 1                                     |
| 201196_s_at | AMD1         | adenosylmethionine decarboxylase 1                             |
| 201490_s_at | PPIF         | peptidylprolyl isomerase F (cyclophilin F)                     |
| 211572_     | SLC23A2      | solute carrier family 23 (nucleobase transporters), member 2   |

|             |         |                                                             |
|-------------|---------|-------------------------------------------------------------|
| s_at        |         |                                                             |
| 220745_at   | IL19    | interleukin 19                                              |
| 221245_s_at | FZD5    | frizzled homolog 5 (Drosophila)                             |
| 221704_s_at | VPS37B  | vacuolar protein sorting 37 homolog B (S. cerevisiae)       |
| 219795_at   | SLC6A14 | solute carrier family 6 (amino acid transporter), member 14 |
| 220249_at   | HYAL4   | hyaluronoglucosaminidase 4                                  |
| 216905_s_at | ST14    | suppression of tumorigenicity 14 (colon carcinoma)          |
| 217738_at   | NAMPT   | nicotinamide phosphoribosyltransferase                      |
| 216316_x_at | GK      | glycerol kinase                                             |
| 216834_at   | RGS1    | regulator of G-protein signaling 1                          |
| 215966_     | GK3P    | glycerol kinase 3 pseudogene                                |

|             |          |                                                                                     |
|-------------|----------|-------------------------------------------------------------------------------------|
| x_at        |          |                                                                                     |
| 215977_x_at | GK       | glycerol kinase                                                                     |
| 215103_at   | CYP2C18  | cytochrome P450, family 2, subfamily C, polypeptide 18                              |
| 215223_s_at | SOD2     | superoxide dismutase 2, mitochondrial                                               |
| 212976_at   | LRRC8B   | leucine rich repeat containing 8 family, member B                                   |
| 213523_at   | CCNE1    | cyclin E1                                                                           |
| 210827_s_at | ELF3     | E74-like factor 3 (ets domain transcription factor, epithelial-specific )           |
| 211429_s_at | SERPINA1 | serpin peptidase inhibitor, clade A (alpha-1 antiproteinase, antitrypsin), member 1 |

|             |         |                                                                      |
|-------------|---------|----------------------------------------------------------------------|
|             |         |                                                                      |
| 210001_s_at | SOCS1   | suppressor of cytokine signaling 1                                   |
| 210567_s_at | SKP2    | S-phase kinase-associated protein 2 (p45)                            |
| 209236_at   | SLC23A2 | solute carrier family 23 (nucleobase transporters), member 2         |
| 209853_s_at | PSME3   | proteasome (prosome, macropain) activator subunit 3 (PA28 gamma; Ki) |
| 207500_at   | CASP5   | caspase 5, apoptosis-related cysteine peptidase                      |
| 209100_at   | IFRD2   | interferon-related developmental regulator 2                         |
| 206336_at   | CXCL6   | chemokine (C-X-C motif) ligand 6 (granulocyte chemotactic protein 2) |
| 206529_x_at | SLC26A4 | solute carrier family 26, member 4                                   |
| 205239_at   | AREG    | amphiregulin                                                         |



|             |       |                                     |
|-------------|-------|-------------------------------------|
|             |       |                                     |
| 205633_s_at | ALAS1 | aminolevulinate, delta-, synthase 1 |
| 204440_at   | CD83  | CD83 molecule                       |
| 204858_s_at | TYMP  | thymidine phosphorylase             |
| 203665_at   | HMOX1 | heme oxygenase (decycling) 1        |
| 203904_x_at | CD82  | CD82 molecule                       |
| 203234_at   | UPP1  | uridine phosphorylase 1             |
| 203499_     | EPHA2 | EPH receptor A2                     |

|             |          |                                                                                     |
|-------------|----------|-------------------------------------------------------------------------------------|
| at          |          |                                                                                     |
| 203127_s_at | SPTLC2   | serine palmitoyltransferase, long chain base subunit 2                              |
| 203233_at   | IL4R     | interleukin 4 receptor                                                              |
| 202833_s_at | SERPINA1 | serpin peptidase inhibitor, clade A (alpha-1 antiproteinase, antitrypsin), member 1 |
| 202988_s_at | RGS1     | regulator of G-protein signaling 1                                                  |
| 202575_at   | CRABP2   | cellular retinoic acid binding protein 2                                            |
| 202779_s_at | UBE2S    | ubiquitin-conjugating enzyme E2S                                                    |
| 201243_s_at | ATP1B1   | ATPase, Na <sup>+</sup> /K <sup>+</sup> transporting, beta 1 polypeptide            |
| 201473_at   | JUNB     | jun B proto-oncogene                                                                |
| 203968_s_at | CDC6     | cell division cycle 6 homolog ( <i>S. cerevisiae</i> )                              |

|             |         |                                                              |
|-------------|---------|--------------------------------------------------------------|
|             |         |                                                              |
| 38037_at    | HBEGF   | heparin-binding EGF-like growth factor                       |
| 203821_at   | HBEGF   | heparin-binding EGF-like growth factor                       |
| 208893_s_at | DUSP6   | dual specificity phosphatase 6                               |
| 205015_s_at | TGFA    | transforming growth factor, alpha                            |
| 209237_s_at | SLC23A2 | solute carrier family 23 (nucleobase transporters), member 2 |
| 222223_s_at | IL1F5   | interleukin 1 family, member 5 (delta)                       |
| 204493_at   | BID     | BH3 interacting domain death agonist                         |

|             |           |                                                          |
|-------------|-----------|----------------------------------------------------------|
| 220664_at   | SPRR2C    | small proline-rich protein 2C (pseudogene)               |
| 222037_at   | MCM4      | minichromosome maintenance complex component 4           |
| 218810_at   | ZC3H12A   | zinc finger CCCH-type containing 12A                     |
| 219680_at   | NLRX1     | NLR family member X1                                     |
| 216212_s_at | DKC1      | dyskeratosis congenita 1, dyskerin                       |
| 217185_s_at | LOC442240 | similar to zinc finger protein 259                       |
| 213421_x_at | PRSS3     | protease, serine, 3                                      |
| 214011_s_at | HSPC111   | hypothetical protein HSPC111                             |
| 210754_s_at | LYN       | v-yes-1 Yamaguchi sarcoma viral related oncogene homolog |
| 212141_at   | MCM4      | minichromosome maintenance complex component 4           |
| 209792_s_at | KLK10     | kallikrein-related peptidase 10                          |

|                 |        |                                                                                  |
|-----------------|--------|----------------------------------------------------------------------------------|
| 209800_<br>at   | KRT16  | keratin 16                                                                       |
| 209727_<br>at   | GM2A   | GM2 ganglioside activator                                                        |
| 209772_<br>s_at | CD24   | CD24 molecule                                                                    |
| 209126_<br>x_at | KRT6B  | keratin 6B                                                                       |
| 209514_<br>s_at | RAB27A | RAB27A, member RAS oncogene family                                               |
| 208992_<br>s_at | STAT3  | signal transducer and activator of transcription 3 (acute-phase response factor) |
| 209093_<br>s_at | GBA    | glucosidase, beta; acid (includes glucosylceramidase)                            |

|                 |         |                                                                               |
|-----------------|---------|-------------------------------------------------------------------------------|
|                 |         |                                                                               |
| 208002_<br>s_at | ACOT7   | acyl-CoA thioesterase 7                                                       |
| 208433_<br>s_at | LRP8    | low density lipoprotein receptor-related protein 8, apolipoprotein e receptor |
| 207381_<br>at   | ALOX12B | arachidonate 12-lipoxygenase, 12R type                                        |
| 207463_<br>x_at | PRSS3   | protease, serine, 3                                                           |
| 206788_<br>s_at | CBFB    | core-binding factor, beta subunit                                             |
| 207367_<br>at   | ATP12A  | ATPase, H+/K+ transporting, nongastric, alpha polypeptide                     |
| 206499_<br>s_at | RCC1    | regulator of chromosome condensation 1                                        |

|             |        |                                                                                                  |
|-------------|--------|--------------------------------------------------------------------------------------------------|
|             |        |                                                                                                  |
| 206628_at   | SLC5A1 | solute carrier family 5 (sodium/glucose cotransporter), member 1                                 |
| 206008_at   | TGM1   | transglutaminase 1 (K polypeptide epidermal type I, protein-glutamine-gamma-glutamyltransferase) |
| 206472_s_at | TLE3   | transducin-like enhancer of split 3 (E(sp1) homolog, Drosophila)                                 |
| 205895_s_at | NOLC1  | nucleolar and coiled-body phosphoprotein 1                                                       |
| 206004_at   | TGM3   | transglutaminase 3 (E polypeptide, protein-glutamine-gamma-glutamyltransferase)                  |
| 205595_at   | DSG3   | desmoglein 3 (pemphigus vulgaris antigen)                                                        |
| 205847_at   | PRSS22 | protease, serine, 22                                                                             |
| 205349_at   | GNA15  | guanine nucleotide binding protein (G protein), alpha 15 (Gq class)                              |
| 205476_at   | CCL20  | chemokine (C-C motif) ligand 20                                                                  |
| 204767_s_at | FEN1   | flap structure-specific endonuclease 1                                                           |

|             |        |                                                        |
|-------------|--------|--------------------------------------------------------|
|             |        |                                                        |
| 205014_at   | FGFBP1 | fibroblast growth factor binding protein 1             |
| 203128_at   | SPTLC2 | serine palmitoyltransferase, long chain base subunit 2 |
| 203147_s_at | TRIM14 | tripartite motif-containing 14                         |
| 202068_s_at | LDLR   | low density lipoprotein receptor                       |
| 202712_s_at | CKMT1B | creatine kinase, mitochondrial 1B                      |
| 201531_at   | ZFP36  | zinc finger protein 36, C3H type, homolog (mouse)      |
| 201583_s_at | SEC23B | Sec23 homolog B ( <i>S. cerevisiae</i> )               |
| 200874_s_at | NOL5A  | nucleolar protein 5A (56kDa with KKE/D repeat)         |
| 201489_at   | PPIF   | peptidylprolyl isomerase F (cyclophilin F)             |



|             |          |                                                                                   |
|-------------|----------|-----------------------------------------------------------------------------------|
|             |          |                                                                                   |
| 200648_s_at | GLUL     | glutamate-ammonia ligase (glutamine synthetase)                                   |
| 200731_s_at | PTP4A1   | protein tyrosine phosphatase type IVA, member 1                                   |
| 220599_s_at | CARD14   | caspase recruitment domain family, member 14                                      |
| 39249_at    | AQP3     | aquaporin 3 (Gill blood group)                                                    |
| 220318_at   | EPN3     | epsin 3                                                                           |
| 220322_at   | IL1F9    | interleukin 1 family, member 9                                                    |
| 219695_at   | SMPD3    | sphingomyelin phosphodiesterase 3, neutral membrane (neutral sphingomyelinase II) |
| 220013_at   | ABHD9    | abhydrolase domain containing 9                                                   |
| 219403_s_at | HPSE     | heparanase                                                                        |
| 219630_at   | PDZK1IP1 | PDZK1 interacting protein 1                                                       |
| 219272_at   | TRIM62   | tripartite motif-containing 62                                                    |
| 219358_s_at | CENTA2   | centaurin, alpha 2                                                                |

|             |              |                                                                                                                                                                        |
|-------------|--------------|------------------------------------------------------------------------------------------------------------------------------------------------------------------------|
| 218295_s_at | NUP50        | nucleoporin 50kDa                                                                                                                                                      |
| 218900_at   | CNNM4        | cyclin M4                                                                                                                                                              |
| 217202_s_at | GLUL         | glutamate-ammonia ligase (glutamine synthetase)                                                                                                                        |
| 217755_at   | HN1          | hematological and neurological expressed 1                                                                                                                             |
| 216684_s_at | SS18         | synovial sarcoma translocation, chromosome 18                                                                                                                          |
| 217140_s_at | LOC100132302 | similar to Voltage-dependent anion-selective channel protein 1 (VDAC-1) (hVDAC1) (Outer mitochondrial membrane porin 1) (Plasmalemmal porin) (Porin 31HL) (Porin 31HM) |
| 216258_s_at | SERPINB13    | serpin peptidase inhibitor, clade B (ovalbumin), member 13                                                                                                             |
| 216379_x_at |              |                                                                                                                                                                        |
| 215465_at   | ABCA12       | ATP-binding cassette, sub-family A (ABC1), member 12                                                                                                                   |
| 215728_s_at | ACOT7        | acyl-CoA thioesterase 7                                                                                                                                                |
| 214490_at   | ARSF         | arylsulfatase F                                                                                                                                                        |
| 214549_x_at | SPRR1A       | small proline-rich protein 1A                                                                                                                                          |
| 214070_s_at | ATP10B       | ATPase, class V, type 10B                                                                                                                                              |
| 214205_x_at | GLRX3        | glutaredoxin 3                                                                                                                                                         |
| 213562_s_at | SQLE         | squalene epoxidase                                                                                                                                                     |

|             |          |                                                                                   |
|-------------|----------|-----------------------------------------------------------------------------------|
| 213796_at   | SPRR1A   | small proline-rich protein 1A                                                     |
| 213060_s_at | CHI3L2   | chitinase 3-like 2                                                                |
| 213470_s_at | HNRNPH1  | heterogeneous nuclear ribonucleoprotein H1 (H)                                    |
| 211367_s_at | CASP1    | caspase 1, apoptosis-related cysteine peptidase (interleukin 1, beta, convertase) |
| 212531_at   | LCN2     | lipocalin 2                                                                       |
| 211015_s_at | HSPA4    | heat shock 70kDa protein 4                                                        |
| 211366_x_at | CASP1    | caspase 1, apoptosis-related cysteine peptidase (interleukin 1, beta, convertase) |
| 210663_s_at | KYNU     | kynureninase (L-kynurenine hydrolase)                                             |
| 210951_x_at | RAB27A   | RAB27A, member RAS oncogene family                                                |
| 209872_s_at | PKP3     | plakophilin 3                                                                     |
| 210413_x_at | SERPINB4 | serpin peptidase inhibitor, clade B (ovalbumin), member 4                         |
| 209719_     | SERPINB3 | serpin peptidase inhibitor, clade B (ovalbumin), member 3                         |

|             |        |                                                      |
|-------------|--------|------------------------------------------------------|
| x_at        |        |                                                      |
| 209771_x_at |        |                                                      |
| 208651_x_at | CD24   | CD24 molecule                                        |
| 209372_x_at | TUBB2A | tubulin, beta 2A                                     |
| 208596_s_at | UGT1A3 | UDP glucuronosyltransferase 1 family, polypeptide A3 |
| 208650_s_at | CD24   | CD24 molecule                                        |

|             |         |                                                      |
|-------------|---------|------------------------------------------------------|
|             |         |                                                      |
| 207622_s_at | ABCF2   | ATP-binding cassette, sub-family F (GCN20), member 2 |
| 208539_x_at | SPRR2D  | small proline-rich protein 2D                        |
| 216237_s_at | MCM5    | minichromosome maintenance complex component 5       |
| 217167_x_at | GK      | glycerol kinase                                      |
| 205829_at   | HSD17B1 | hydroxysteroid (17-beta) dehydrogenase 1             |
| 205863_at   | S100A12 | S100 calcium binding protein A12                     |
| 218498_s_at | ERO1L   | ERO1-like ( <i>S. cerevisiae</i> )                   |
| 207720_at   | LOR     | loricrin                                             |

|             |         |                                                                           |
|-------------|---------|---------------------------------------------------------------------------|
|             |         |                                                                           |
| 210212_x_at | MTCP1   | mature T-cell proliferation 1                                             |
| 209205_s_at | LMO4    | LIM domain only 4                                                         |
| 209206_at   | SEC22B  | SEC22 vesicle trafficking protein homolog B ( <i>S. cerevisiae</i> )      |
| 205467_at   | CASP10  | caspase 10, apoptosis-related cysteine peptidase                          |
| 206953_s_at | LPHN2   | latrophilin 2                                                             |
| 205074_at   | SLC22A5 | solute carrier family 22 (organic cation/carnitine transporter), member 5 |
| 205191_at   | RP2     | retinitis pigmentosa 2 (X-linked recessive)                               |
| 203803_at   | PCYOX1  | prenylcysteine oxidase 1                                                  |
| 203881_s_at | DMD     | dystrophin                                                                |
| 212148_     | PBX1    | pre-B-cell leukemia homeobox 1                                            |

|             |          |                                                                 |
|-------------|----------|-----------------------------------------------------------------|
| at          |          |                                                                 |
| 212327_at   | LIMCH1   | LIM and calponin homology domains 1                             |
| 204041_at   | MAOB     | monoamine oxidase B                                             |
| 204568_at   | KIAA0831 | KIAA0831                                                        |
| 221188_s_at | CIDEB    | cell death-inducing DFFA-like effector b                        |
| 222111_at   |          |                                                                 |
| 213657_s_at |          |                                                                 |
| 203080_s_at | BAZ2B    | bromodomain adjacent to zinc finger domain, 2B                  |
| 203202_at   | KRR1     | KRR1, small subunit (SSU) processome component, homolog (yeast) |
| 201836_s_at | SUPT7L   | suppressor of Ty 7 ( <i>S. cerevisiae</i> )-like                |
| 201843_s_at | EFEMP1   | EGF-containing fibulin-like extracellular matrix protein 1      |
| 201661_s_at | ACSL3    | acyl-CoA synthetase long-chain family member 3                  |
| 201824_at   | RNF14    | ring finger protein 14                                          |

|             |              |                                                         |
|-------------|--------------|---------------------------------------------------------|
|             |              |                                                         |
| 201124_at   | ITGB5        | integrin, beta 5                                        |
| 201449_at   | TIA1         | TIA1 cytotoxic granule-associated RNA binding protein   |
| 200719_at   | SKP1         | S-phase kinase-associated protein 1                     |
| 200856_x_at | LOC100133918 | similar to nuclear receptor co-repressor 1              |
| 221213_s_at | ZNF280D      | zinc finger protein 280D                                |
| 44783_s_at  | HEY1         | hairy/enhancer-of-split related with YRPW motif 1       |
| 220351_at   | CCRL1        | chemokine (C-C motif) receptor-like 1                   |
| 220988_s_at | C1QTNF3      | C1q and tumor necrosis factor related protein 3         |
| 219518_s_at | ELL3         | elongation factor RNA polymerase II-like 3              |
| 220244_at   | LOH3CR2A     | loss of heterozygosity, 3, chromosomal region 2, gene A |
| 219213_at   | JAM2         | junctional adhesion molecule 2                          |



|             |         |                                                                          |
|-------------|---------|--------------------------------------------------------------------------|
|             |         |                                                                          |
| 219517_at   | ELL3    | elongation factor RNA polymerase II-like 3                               |
| 218641_at   | MGC3032 | hypothetical protein MGC3032                                             |
| 219132_at   | PELI2   | pellino homolog 2 (Drosophila)                                           |
| 218532_s_at | FAM134B | family with sequence similarity 134, member B                            |
| 218633_x_at | ABHD10  | abhydrolase domain containing 10                                         |
| 218437_s_at | LZTFL1  | leucine zipper transcription factor-like 1                               |
| 218490_s_at | ZNF302  | zinc finger protein 302                                                  |
| 218309_at   | CAMK2N1 | calcium/calmodulin-dependent protein kinase II inhibitor 1               |
| 218370_s_at | S100PBP | S100P binding protein                                                    |
| 216320_x_at | MST1    | macrophage stimulating 1 (hepatocyte growth factor-like)                 |
| 216331_at   | ITGA7   | integrin, alpha 7                                                        |
| 214152_at   | CCPG1   | cell cycle progression 1                                                 |
| 214454_at   | ADAMTS2 | ADAM metallopeptidase with thrombospondin type 1 motif, 2                |
| 213496_at   | LPPR4   | plasticity related gene 1                                                |
| 214151_s_at | CCPG1   | cell cycle progression 1                                                 |
| 213106_at   | ATP8A1  | ATPase, aminophospholipid transporter (APLT), class I, type 8A, member 1 |

|             |         |                                                                                                         |
|-------------|---------|---------------------------------------------------------------------------------------------------------|
|             |         |                                                                                                         |
| 213397_x_at | ANG     | angiogenin, ribonuclease, RNase A family, 5                                                             |
| 213010_at   | PRKCDBP | protein kinase C, delta binding protein                                                                 |
| 213075_at   | OLFML2A | olfactomedin-like 2A                                                                                    |
| 212675_s_at | CEP68   | centrosomal protein 68kDa                                                                               |
| 212690_at   | DDHD2   | DDHD domain containing 2                                                                                |
| 212328_at   | LIMCH1  | LIM and calponin homology domains 1                                                                     |
| 212503_s_at | DIP2C   | DIP2 disco-interacting protein 2 homolog C (Drosophila)                                                 |
| 210571_s_at | CMAH    | cytidine monophosphate-N-acetylneuraminic acid hydroxylase (CMP-N-acetylneuramate monooxygenase) pseudo |
| 212097_at   | CAV1    | caveolin 1, caveolae protein, 22kDa                                                                     |

|             |        |                                                                        |
|-------------|--------|------------------------------------------------------------------------|
|             |        |                                                                        |
| 209656_s_at | TMEM47 | transmembrane protein 47                                               |
| 210102_at   | VWA5A  | von Willebrand factor A domain containing 5A                           |
| 209200_at   | MEF2C  | myocyte enhancer factor 2C                                             |
| 209291_at   | ID4    | inhibitor of DNA binding 4, dominant negative helix-loop-helix protein |
| 205609_at   | ANGPT1 | angiopoietin 1                                                         |
| 208760_at   | UBE2I  | ubiquitin-conjugating enzyme E2I (UBC9 homolog, yeast)                 |
| 205158_at   | RNASE4 | ribonuclease, RNase A family, 4                                        |
| 205225_at   | ESR1   | estrogen receptor 1                                                    |

|             |        |                                                  |
|-------------|--------|--------------------------------------------------|
|             |        |                                                  |
| 204992_s_at | PFN2   | profilin 2                                       |
| 205076_s_at | MTMR11 | myotubularin related protein 11                  |
| 204797_s_at | EML1   | echinoderm microtubule associated protein like 1 |
| 204838_s_at | MLH3   | mutL homolog 3 (E. coli)                         |
| 204686_at   | IRS1   | insulin receptor substrate 1                     |
| 204788_s_at | PPOX   | protoporphyrinogen oxidase                       |
| 203919_at   | TCEA2  | transcription elongation factor A (SII), 2       |
| 204276_at   | TK2    | thymidine kinase 2, mitochondrial                |
| 203723_s_at | ITPKB  | inositol 1,4,5-trisphosphate 3-kinase B          |

|             |         |                                                                                                   |
|-------------|---------|---------------------------------------------------------------------------------------------------|
| at          |         |                                                                                                   |
| 203874_s_at | SMARCA1 | SWI/SNF related, matrix associated, actin dependent regulator of chromatin, subfamily a, member 1 |
| 203065_s_at | CAV1    | caveolin 1, caveolae protein, 22kDa                                                               |
| 203335_at   | PHYH    | phytanoyl-CoA 2-hydroxylase                                                                       |
| 202468_s_at | CTNNAL1 | catenin (cadherin-associated protein), alpha-like 1                                               |
| 202973_x_at | FAM13A1 | family with sequence similarity 13, member A1                                                     |
| 202321_at   | GGPS1   | geranylgeranyl diphosphate synthase 1                                                             |

|             |          |                                                          |
|-------------|----------|----------------------------------------------------------|
|             |          |                                                          |
| 202350_s_at | MATN2    | matrilin 2                                               |
| 201117_s_at | CPE      | carboxypeptidase E                                       |
| 202125_s_at | TRAK2    | trafficking protein, kinesin binding 2                   |
| 205614_x_at | MST1     | macrophage stimulating 1 (hepatocyte growth factor-like) |
| 221756_at   | PIK3IP1  | phosphoinositide-3-kinase interacting protein 1          |
| 218418_s_at | KANK2    | KN motif and ankyrin repeat domains 2                    |
| 219440_at   | RAI2     | retinoic acid induced 2                                  |
| 213369_at   | PCDH21   | protocadherin 21                                         |
| 213455_at   | FAM114A1 | family with sequence similarity 114, member A1           |
| 212299_at   | NEK9     | NIMA (never in mitosis gene a)- related kinase 9         |
| 213249_at   | FBXL7    | F-box and leucine-rich repeat protein 7                  |
| 208158_s_at | OSBPL1A  | oxysterol binding protein-like 1A                        |
| 210135_s_at | SHOX2    | short stature homeobox 2                                 |
| 205932_s_at | MSX1     | msh homeobox 1                                           |
| 206149_     | CHP2     | calcineurin B homologous protein 2                       |

|             |          |                                                                                                                        |
|-------------|----------|------------------------------------------------------------------------------------------------------------------------|
| at          |          |                                                                                                                        |
| 204151_x_at | AKR1C1   | aldo-keto reductase family 1, member C1 (dihydrodiol dehydrogenase 1; 20-alpha (3-alpha)-hydroxysteroid dehydrogenase) |
| 204939_s_at | PLN      | phospholamban                                                                                                          |
| 202500_at   | DNAJB2   | DnaJ (Hsp40) homolog, subfamily B, member 2                                                                            |
| 202733_at   | P4HA2    | procollagen-proline, 2-oxoglutarate 4-dioxygenase (proline 4-hydroxylase), alpha polypeptide II                        |
| 65472_at    | C2orf68  | chromosome 2 open reading frame 68                                                                                     |
| 202289_s_at | TACC2    | transforming, acidic coiled-coil containing protein 2                                                                  |
| 45297_at    | EHD2     | EH-domain containing 2                                                                                                 |
| 64942_at    | GPR153   | G protein-coupled receptor 153                                                                                         |
| 38892_at    | KIAA0240 | KIAA0240                                                                                                               |
| 40446_at    | PHF1     | PHD finger protein 1                                                                                                   |
| 222156_x_at | CCPG1    | cell cycle progression 1                                                                                               |
| 222273_at   | PAPOLG   | poly(A) polymerase gamma                                                                                               |
| 221974_at   | SNRPN    | small nuclear ribonucleoprotein polypeptide N                                                                          |

|             |          |                                                    |
|-------------|----------|----------------------------------------------------|
|             |          |                                                    |
| 222125_s_at | PH-4     | hypoxia-inducible factor prolyl 4-hydroxylase      |
| 221833_at   | SIAH1    | seven in absentia homolog 1 (Drosophila)           |
| 221864_at   | ORAI3    | ORAI calcium release-activated calcium modulator 3 |
| 221735_at   | WDR48    | WD repeat domain 48                                |
| 221749_at   | YTHDF3   | YTH domain family, member 3                        |
| 221589_s_at | ALDH6A1  | aldehyde dehydrogenase 6 family, member A1         |
| 221645_s_at | ZNF83    | zinc finger protein 83                             |
| 221543_s_at | ERLIN2   | ER lipid raft associated 2                         |
| 221554_at   | LYK5     | protein kinase LYK5                                |
| 221511_x_at | CCPG1    | cell cycle progression 1                           |
| 221523_s_at | RRAGD    | Ras-related GTP binding D                          |
| 221208_     | C11orf61 | chromosome 11 open reading frame 61                |



|             |         |                                                                 |
|-------------|---------|-----------------------------------------------------------------|
| s_at        |         |                                                                 |
| 221510_s_at | GLS     | glutaminase                                                     |
| 221090_s_at | OGFOD1  | 2-oxoglutarate and iron-dependent oxygenase domain containing 1 |
| 221156_x_at | CCPG1   | cell cycle progression 1                                        |
| 220974_x_at | SFXN3   | sideroflexin 3                                                  |
| 221014_s_at | RAB33B  | RAB33B, member RAS oncogene family                              |
| 220432_s_at | CYP39A1 | cytochrome P450, family 39, subfamily A, polypeptide 1          |
| 220744_s_at | IFT122  | intraflagellar transport 122 homolog (Chlamydomonas)            |
| 219909_at   | MMP28   | matrix metalloproteinase 28                                     |
| 220402_at   | P53AIP1 | p53-regulated apoptosis-inducing protein 1                      |
| 219833_s_at | EFHC1   | EF-hand domain (C-terminal) containing 1                        |
| 219848_s_at | ZNF432  | zinc finger protein 432                                         |
| 219765_at   | ZNF329  | zinc finger protein 329                                         |

|             |          |                                                                                 |
|-------------|----------|---------------------------------------------------------------------------------|
| 219802_at   | PYROXD1  | pyridine nucleotide-disulphide oxidoreductase domain 1                          |
| 219407_s_at | LAMC3    | laminin, gamma 3                                                                |
| 219487_at   | BBS10    | Bardet-Biedl syndrome 10                                                        |
| 219376_at   | ZNF322A  | zinc finger protein 322A                                                        |
| 219401_at   | XYLT2    | xylosyltransferase II                                                           |
| 219284_at   | HSPBAP1  | HSPB (heat shock 27kDa) associated protein 1                                    |
| 219353_at   | NHLRC2   | NHL repeat containing 2                                                         |
| 219069_at   | ANKRD49  | ankyrin repeat domain 49                                                        |
| 219274_at   | TSPAN12  | tetraspanin 12                                                                  |
| 218878_s_at | SIRT1    | sirtuin (silent mating type information regulation 2 homolog) 1 (S. cerevisiae) |
| 218909_at   | RPS6KC1  | ribosomal protein S6 kinase, 52kDa, polypeptide 1                               |
| 218761_at   | RNF111   | ring finger protein 111                                                         |
| 218789_s_at | C11orf71 | chromosome 11 open reading frame 71                                             |

|                 |          |                                                                                       |
|-----------------|----------|---------------------------------------------------------------------------------------|
| 218718_<br>at   | PDGFC    | platelet derived growth factor C                                                      |
| 218757_<br>s_at | UPF3B    | UPF3 regulator of nonsense transcripts homolog B (yeast)                              |
| 218694_<br>at   | ARMCX1   | armadillo repeat containing, X-linked 1                                               |
| 218701_<br>at   | LACTB2   | lactamase, beta 2                                                                     |
| 218651_<br>s_at | LARP6    | La ribonucleoprotein domain family, member 6                                          |
| 218683_<br>at   | PTBP2    | polypyrimidine tract binding protein 2                                                |
| 218574_<br>s_at | LMCD1    | LIM and cysteine-rich domains 1                                                       |
| 218637_<br>at   | IMPACT   | Impact homolog (mouse)                                                                |
| 218528_<br>s_at | RNF38    | ring finger protein 38                                                                |
| 218546_<br>at   | C1orf115 | chromosome 1 open reading frame 115                                                   |
| 218456_<br>at   | CAPRIN2  | caprin family member 2                                                                |
| 218491_<br>s_at | THYN1    | thymocyte nuclear protein 1                                                           |
| 218352_<br>at   | RCBTB1   | regulator of chromosome condensation (RCC1) and BTB (POZ) domain containing protein 1 |
| 218361_<br>at   | GOLPH3L  | golgi phosphoprotein 3-like                                                           |
| 218304_<br>s_at | OSBPL11  | oxysterol binding protein-like 11                                                     |
| 218346_<br>s_at | SESN1    | sestrin 1                                                                             |
| 218168_<br>s_at | CABC1    | chaperone, ABC1 activity of bc1 complex homolog (S. pombe)                            |
| 218285_<br>s_at | BDH2     | 3-hydroxybutyrate dehydrogenase, type 2                                               |

|             |        |                                                                                          |
|-------------|--------|------------------------------------------------------------------------------------------|
| 217935_s_at | UQCC   | ubiquinol-cytochrome c reductase complex chaperone                                       |
| 217954_s_at | PHF3   | PHD finger protein 3                                                                     |
| 217853_at   | TNS3   | tensin 3                                                                                 |
| 217894_at   | KCTD3  | potassium channel tetramerisation domain containing 3                                    |
| 216321_s_at | NR3C1  | nuclear receptor subfamily 3, group C, member 1 (glucocorticoid receptor)                |
| 217800_s_at | NDFIP1 | Nedd4 family interacting protein 1                                                       |
| 214843_s_at | USP33  | ubiquitin specific peptidase 33                                                          |
| 215012_at   | ZNF451 | zinc finger protein 451                                                                  |
| 214724_at   | DIXDC1 | DIX domain containing 1                                                                  |
| 214749_s_at | ARMCX6 | armadillo repeat containing, X-linked 6                                                  |
| 214683_s_at | CLK1   | CDC-like kinase 1                                                                        |
| 214686_at   | ZNF266 | zinc finger protein 266                                                                  |
| 214132_at   | ATP5C1 | ATP synthase, H <sup>+</sup> transporting, mitochondrial F1 complex, gamma polypeptide 1 |

|             |              |                                                                                                                                             |
|-------------|--------------|---------------------------------------------------------------------------------------------------------------------------------------------|
| 214186_s_at | 3.8-1        | MHC class I mRNA fragment 3.8-1                                                                                                             |
| 213982_s_at | RABGAP1<br>L | RAB GTPase activating protein 1-like                                                                                                        |
| 214036_at   |              |                                                                                                                                             |
| 213675_at   |              |                                                                                                                                             |
| 213895_at   | EMP1         | epithelial membrane protein 1                                                                                                               |
| 213592_at   | APLNR        | apelin receptor                                                                                                                             |
| 213626_at   | CBR4         | carbonyl reductase 4                                                                                                                        |
| 213480_at   | VAMP4        | vesicle-associated membrane protein 4                                                                                                       |
| 213500_at   |              |                                                                                                                                             |
| 213304_at   | FAM179B      | family with sequence similarity 179, member B                                                                                               |
| 213331_s_at | NEK1         | NIMA (never in mitosis gene a)-related kinase 1                                                                                             |
| 213169_at   | SEMA5A       | sema domain, seven thrombospondin repeats (type 1 and type 1-like), transmembrane domain (TM) and short cytoplasmic domain, (semaphorin) 5A |
| 213213_at   | DIDO1        | death inducer-obliterator 1                                                                                                                 |
| 212984_at   | ATF2         | activating transcription factor 2                                                                                                           |
| 213020_at   | GOSR1        | golgi SNAP receptor complex member 1                                                                                                        |

|             |         |                                                          |
|-------------|---------|----------------------------------------------------------|
| 212981_s_at | FAM115A | family with sequence similarity 115, member A            |
| 212982_at   | ZDHHC17 | zinc finger, DHHC-type containing 17                     |
| 212847_at   | FUBP1   | far upstream element (FUSE) binding protein 1            |
| 212893_at   | ZZZ3    | zinc finger, ZZ-type containing 3                        |
| 212761_at   | TCF7L2  | transcription factor 7-like 2 (T-cell specific, HMG-box) |
| 212762_s_at | TCF7L2  | transcription factor 7-like 2 (T-cell specific, HMG-box) |
| 212752_at   | CLASP1  | cytoplasmic linker associated protein 1                  |

|             |        |                                                                   |
|-------------|--------|-------------------------------------------------------------------|
|             |        |                                                                   |
| 212756_s_at | UBR2   | ubiquitin protein ligase E3 component n-recognin 2                |
| 212631_at   | STX7   | syntaxin 7                                                        |
| 212669_at   | CAMK2G | calcium/calmodulin-dependent protein kinase (CaM kinase) II gamma |
| 212549_at   | STAT5B | signal transducer and activator of transcription 5B               |
| 212628_at   | PKN2   | protein kinase N2                                                 |
| 212510_at   | GPD1L  | glycerol-3-phosphate dehydrogenase 1-like                         |

|             |         |                                                                           |
|-------------|---------|---------------------------------------------------------------------------|
|             |         |                                                                           |
| 212511_at   | PICALM  | phosphatidylinositol binding clathrin assembly protein                    |
| 212310_at   | MIA3    | melanoma inhibitory activity family, member 3                             |
| 212504_at   | DIP2C   | DIP2 disco-interacting protein 2 homolog C (Drosophila)                   |
| 212243_at   | GRINL1A | glutamate receptor, ionotropic, N-methyl D-aspartate-like 1A              |
| 212305_s_at | MIA3    | melanoma inhibitory activity family, member 3                             |
| 212122_at   | RHOQ    | ras homolog gene family, member Q                                         |
| 212158_at   | SDC2    | syndecan 2                                                                |
| 212060_at   | SR140   | U2-associated SR140 protein                                               |
| 212061_at   | SR140   | U2-associated SR140 protein                                               |
| 210346_s_at | CLK4    | CDC-like kinase 4                                                         |
| 211105_s_at | NFATC1  | nuclear factor of activated T-cells, cytoplasmic, calcineurin-dependent 1 |
| 209894_at   | LEPR    | leptin receptor                                                           |



|             |        |                                                                                                            |
|-------------|--------|------------------------------------------------------------------------------------------------------------|
|             |        |                                                                                                            |
| 210239_at   | IRX5   | iroquois homeobox 5                                                                                        |
| 209815_at   | PTCH1  | patched homolog 1 (Drosophila)                                                                             |
| 209884_s_at | SLC4A7 | solute carrier family 4, sodium bicarbonate cotransporter, member 7                                        |
| 209537_at   | EXTL2  | exostoses (multiple)-like 2                                                                                |
| 209568_s_at | RGL1   | ral guanine nucleotide dissociation stimulator-like 1                                                      |
| 209497_s_at | RBM4B  | RNA binding motif protein 4B                                                                               |
| 209501_at   | CDR2   | cerebellar degeneration-related protein 2, 62kDa                                                           |
| 209484_s_at | NSL1   | NSL1, MIND kinetochore complex component, homolog (S. cerevisiae)                                          |
| 209487_at   | RBPMS  | RNA binding protein with multiple splicing                                                                 |
| 209323_at   | PRKRIR | protein-kinase, interferon-inducible double stranded RNA dependent inhibitor, repressor of (P58 repressor) |

|                 |        |                                                              |
|-----------------|--------|--------------------------------------------------------------|
| 209422_<br>at   | PHF20  | PHD finger protein 20                                        |
| 209300_<br>s_at | NECAP1 | NECAP endocytosis associated 1                               |
| 209307_<br>at   | SWAP70 | SWAP-70 protein                                              |
| 209268_<br>at   | VPS45  | vacuolar protein sorting 45 homolog ( <i>S. cerevisiae</i> ) |
| 209298_<br>s_at | ITSN1  | intersectin 1 (SH3 domain protein)                           |
| 209112_<br>at   | CDKN1B | cyclin-dependent kinase inhibitor 1B (p27, Kip1)             |
| 209167_<br>at   | GPM6B  | glycoprotein M6B                                             |
| 209031_<br>at   | CADM1  | cell adhesion molecule 1                                     |

|             |           |                                                                       |
|-------------|-----------|-----------------------------------------------------------------------|
| 209064_x_at | LOC645139 | hypothetical LOC645139                                                |
| 208986_at   | TCF12     | transcription factor 12                                               |
| 209005_at   | FBXL5     | F-box and leucine-rich repeat protein 5                               |
| 208913_at   | GGA2      | golgi associated, gamma adaptin ear containing, ARF binding protein 2 |
| 208939_at   | SEPHS1    | selenophosphate synthetase 1                                          |
| 208398_s_at | TBPL1     | TBP-like 1                                                            |
| 208848_at   | ADH5      | alcohol dehydrogenase 5 (class III), chi polypeptide                  |
| 207719_x_at | CEP170    | centrosomal protein 170kDa                                            |
| 207753_at   | ZNF304    | zinc finger protein 304                                               |
| 206555_     | THUMPD1   | THUMP domain containing 1                                             |

|             |         |                                                                       |
|-------------|---------|-----------------------------------------------------------------------|
| s_at        |         |                                                                       |
| 207625_s_at | CBFA2T2 | core-binding factor, runt domain, alpha subunit 2; translocated to, 2 |
| 205928_at   | ZNF443  | zinc finger protein 443                                               |
| 206539_s_at | CYP4F12 | cytochrome P450, family 4, subfamily F, polypeptide 12                |
| 205726_at   | DIAPH2  | diaphanous homolog 2 (Drosophila)                                     |
| 205794_s_at | NOVA1   | neuro-oncological ventral antigen 1                                   |
| 205664_at   | KIN     | KIN, antigenic determinant of recA protein homolog (mouse)            |
| 205684_s_at | DENND4C | DENN/MADD domain containing 4C                                        |
| 205516_x_at | CIZ1    | CDKN1A interacting zinc finger protein 1                              |
| 205558_at   | TRAF6   | TNF receptor-associated factor 6                                      |
| 205437_at   | ZNF211  | zinc finger protein 211                                               |
| 205453_at   | HOXB2   | homeobox B2                                                           |
| 205003_s_at | DOCK4   | dedicator of cytokinesis 4                                            |

|             |          |                                                    |
|-------------|----------|----------------------------------------------------|
| at          |          |                                                    |
| 205006_s_at | NMT2     | N-myristoyltransferase 2                           |
| 204643_s_at | ENOX2    | ecto-NOX disulfide-thiol exchanger 2               |
| 204937_s_at | ZNF274   | zinc finger protein 274                            |
| 204464_s_at | EDNRA    | endothelin receptor type A                         |
| 204523_at   | ZNF140   | zinc finger protein 140                            |
| 204291_at   | ZNF518A  | zinc finger protein 518A                           |
| 204303_s_at | KIAA0427 | KIAA0427                                           |
| 204176_at   | KLHL20   | kelch-like 20 (Drosophila)                         |
| 204237_at   | GULP1    | GULP, engulfment adaptor PTB domain containing 1   |
| 204062_s_at | ULK2     | unc-51-like kinase 2 (C. elegans)                  |
| 204069_at   | MEIS1    | Meis homeobox 1                                    |
| 203981_s_at | ABCD4    | ATP-binding cassette, sub-family D (ALD), member 4 |

|             |        |                                                        |
|-------------|--------|--------------------------------------------------------|
| 204030_s_at | SCHIP1 | schwannomin interacting protein 1                      |
| 203905_at   | PARN   | poly(A)-specific ribonuclease (deadenylation nuclease) |
| 203935_at   | ACVR1  | activin A receptor, type I                             |
| 203825_at   | BRD3   | bromodomain containing 3                               |
| 203855_at   | WDR47  | WD repeat domain 47                                    |
| 203810_at   | DNAJB4 | DnaJ (Hsp40) homolog, subfamily B, member 4            |
| 203822_s_at | ELF2   | E74-like factor 2 (ets domain transcription factor)    |
| 203710_at   | ITPR1  | inositol 1,4,5-triphosphate receptor, type 1           |

|             |              |                                                                |
|-------------|--------------|----------------------------------------------------------------|
|             |              |                                                                |
| 203794_at   | CDC42BP<br>A | CDC42 binding protein kinase alpha (DMPK-like)                 |
| 203614_at   | UTP14C       | UTP14, U3 small nucleolar ribonucleoprotein, homolog C (yeast) |
| 203680_at   | PRKAR2B      | protein kinase, cAMP-dependent, regulatory, type II, beta      |
| 203556_at   | ZHX2         | zinc fingers and homeoboxes 2                                  |
| 203562_at   | FEZ1         | fasciculation and elongation protein zeta 1 (zygin I)          |
| 203494_s_at | CEP57        | centrosomal protein 57kDa                                      |
| 203521_s_at | ZNF318       | zinc finger protein 318                                        |
| 203448_s_at | TERF1        | telomeric repeat binding factor (NIMA-interacting) 1           |
| 203449_s_at | TERF1        | telomeric repeat binding factor (NIMA-interacting) 1           |

|             |        |                                                            |
|-------------|--------|------------------------------------------------------------|
|             |        |                                                            |
| 203284_s_at | HS2ST1 | heparan sulfate 2-O-sulfotransferase 1                     |
| 203323_at   | CAV2   | caveolin 2                                                 |
| 202979_s_at | CREBZF | CREB/ATF bZIP transcription factor                         |
| 202983_at   | HLTF   | helicase-like transcription factor                         |
| 202732_at   | PKIG   | protein kinase (cAMP-dependent, catalytic) inhibitor gamma |
| 202769_at   | CCNG2  | cyclin G2                                                  |
| 202651_at   | LPGAT1 | lysophosphatidylglycerol acyltransferase 1                 |
| 202660_at   | ITPR2  | inositol 1,4,5-triphosphate receptor, type 2               |



|             |         |                                                                     |
|-------------|---------|---------------------------------------------------------------------|
|             |         |                                                                     |
| 202598_at   | S100A13 | S100 calcium binding protein A13                                    |
| 202630_at   | APPBP2  | amyloid beta precursor protein (cytoplasmic tail) binding protein 2 |
| 202551_s_at | CRIM1   | cysteine rich transmembrane BMP regulator 1 (chordin-like)          |
| 202557_at   | HSPA13  | heat shock protein 70kDa family, member 13                          |
| 202409_at   | IGF2    | insulin-like growth factor 2 (somatomedin A)                        |
| 202512_s_at | ATG5    | ATG5 autophagy related 5 homolog (S. cerevisiae)                    |
| 202265_at   | BMI1    | BMI1 polycomb ring finger oncogene                                  |
| 202342_s_at | TRIM2   | tripartite motif-containing 2                                       |
| 202173_s_at | VEZF1   | vascular endothelial zinc finger 1                                  |
| 202260_s_at | STXBP1  | syntaxin binding protein 1                                          |
| 202073_at   | OPTN    | optineurin                                                          |
| 202172_at   | VEZF1   | vascular endothelial zinc finger 1                                  |

|             |           |                                                                      |
|-------------|-----------|----------------------------------------------------------------------|
|             |           |                                                                      |
| 201918_at   | SLC25A36  | solute carrier family 25, member 36                                  |
| 201986_at   | MED13     | mediator complex subunit 13                                          |
| 204294_at   | AMT       | aminomethyltransferase                                               |
| 204671_s_at | ANKRD6    | ankyrin repeat domain 6                                              |
| 221470_s_at | IL1F7     | interleukin 1 family, member 7 (zeta)                                |
| 203249_at   | EZH1      | enhancer of zeste homolog 1 (Drosophila)                             |
| 213118_at   | UHRF1BP1L | UHRF1 binding protein 1-like                                         |
| 211379_x_at | B3GALNT1  | beta-1,3-N-acetylgalactosaminyltransferase 1 (globoside blood group) |
| 212985_at   | APBB2     | amyloid beta (A4) precursor protein-binding, family B, member 2      |
| 220369_at   | SMEK1     | SMEK homolog 1, suppressor of mek1 (Dictyostelium)                   |
| 221715_at   |           |                                                                      |
| 211466_at   | NFIB      | nuclear factor I/B                                                   |

|             |        |                                                                                          |
|-------------|--------|------------------------------------------------------------------------------------------|
| at          |        |                                                                                          |
| 217695_x_at |        |                                                                                          |
| 210282_at   | ZMYM2  | zinc finger, MYM-type 2                                                                  |
| 210985_s_at | SP100  | SP100 nuclear antigen                                                                    |
| 206757_at   | PDE5A  | phosphodiesterase 5A, cGMP-specific                                                      |
| 208262_x_at | MEFV   | Mediterranean fever                                                                      |
| 206438_x_at | TCTN2  | tectonic family member 2                                                                 |
| 206514_s_at | CYP4F3 | cytochrome P450, family 4, subfamily F, polypeptide 3                                    |
| 211133_x_at | LILRB3 | leukocyte immunoglobulin-like receptor, subfamily B (with TM and ITIM domains), member 3 |
| 221712_s_at | WDR74  | WD repeat domain 74                                                                      |
| 203672_x_at | TPMT   | thiopurine S-methyltransferase                                                           |
| 213006_at   | CEBPD  | CCAAT/enhancer binding protein (C/EBP), delta                                            |
| 211712_s_at | ANXA9  | annexin A9                                                                               |
| 202179_at   | BLMH   | bleomycin hydrolase                                                                      |

|             |          |                                                                              |
|-------------|----------|------------------------------------------------------------------------------|
|             |          |                                                                              |
| 210085_s_at | ANXA9    | annexin A9                                                                   |
| 213707_s_at | DLX5     | distal-less homeobox 5                                                       |
| 220413_at   | SLC39A2  | solute carrier family 39 (zinc transporter), member 2                        |
| 205464_at   | SCNN1B   | sodium channel, nonvoltage-gated 1, beta                                     |
| 213820_s_at | STARD5   | STAR-related lipid transfer (START) domain containing 5                      |
| 210015_s_at | MAP2     | microtubule-associated protein 2                                             |
| 210052_s_at | TPX2     | TPX2, microtubule-associated, homolog ( <i>Xenopus laevis</i> )              |
| 214077_x_at | MEIS3P1  | Meis homeobox 3 pseudogene 1                                                 |
| 218541_s_at | C8orf4   | chromosome 8 open reading frame 4                                            |
| 204075_s_at | KIAA0562 | KIAA0562                                                                     |
| 205169_at   | RBBP5    | retinoblastoma binding protein 5                                             |
| 219446_at   | RIC8B    | resistance to inhibitors of cholinesterase 8 homolog B ( <i>C. elegans</i> ) |
| 222162_s_at | ADAMTS1  | ADAM metalloproteinase with thrombospondin type 1 motif, 1                   |

|                 |       |                               |
|-----------------|-------|-------------------------------|
| 209426_<br>s_at | AMACR | alpha-methylacyl-CoA racemase |
|-----------------|-------|-------------------------------|

**Online Repository Table 5. GSEA table responders versus non-responders.**

| GS <sup>a</sup> | SIZE | ES <sup>b</sup> | NES <sub>c</sub> | p-value | FDR <sup>d</sup> |
|-----------------|------|-----------------|------------------|---------|------------------|
| IL17 & TNF      | 36   | -0.91           | -2.95            | 0.000   | 0.000            |
| IL17 specific   | 19   | -0.84           | -2.33            | 0.000   | 0.000            |
| IFN $\gamma$    | 1184 | -0.42           | -2.12            | 0.000   | 0.000            |
| TNF specific    | 557  | -0.38           | -1.82            | 0.000   | 0.001            |

<sup>a</sup>GS gene set

<sup>b</sup>ES enrichment score

<sup>c</sup>NES normalized enrichment score

<sup>d</sup>FDR false discovery rate

**Online Repository Table 6. GSEA table for responders.**

| GS <sup>a</sup> | SIZE | ES <sup>b</sup> | NES <sup>c</sup> | p-value | FDR <sup>d</sup> |
|-----------------|------|-----------------|------------------|---------|------------------|
| IL-17 & TNF     | 36   | -0.90           | -2.84            | 0.000   | 0.000            |
| IL-17 specific  | 19   | -0.86           | -2.38            | 0.000   | 0.000            |
| IFN $\gamma$    | 1184 | -0.41           | -2.10            | 0.000   | 0.000            |
| TNF specific    | 557  | -0.38           | -1.86            | 0.000   | 0.003            |

<sup>a</sup>GS gene set<sup>b</sup>ES enrichment score<sup>c</sup>NES normalized enrichment score<sup>d</sup>FDR false discovery rate

# Online Repository Figure 1

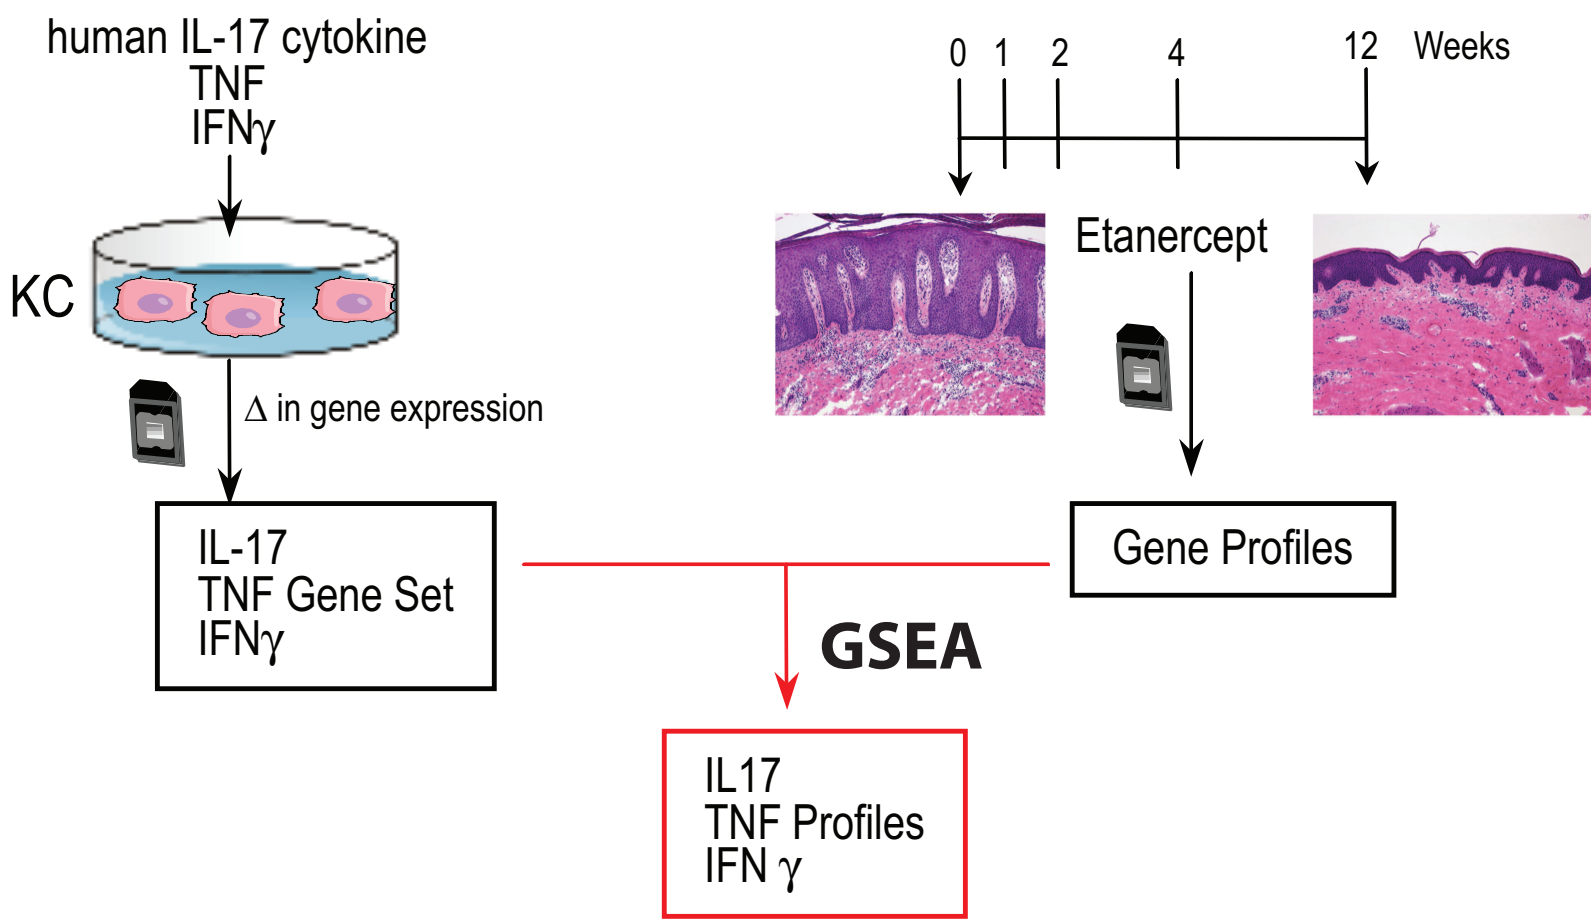



a. Down

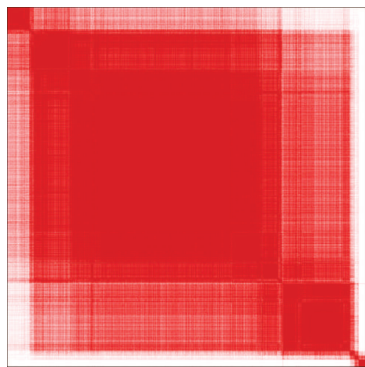

k=3

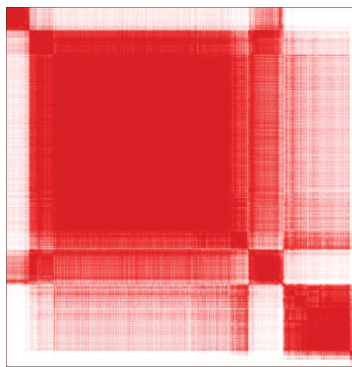

k=4

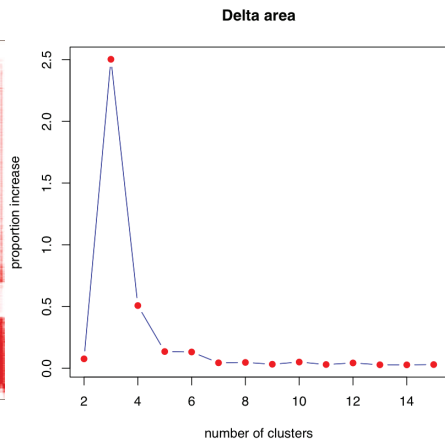

b. Up

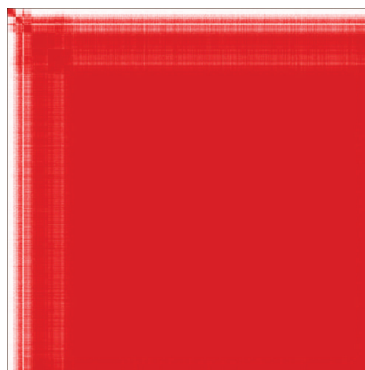

k=3

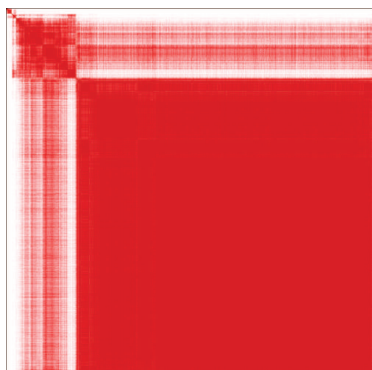

k=5

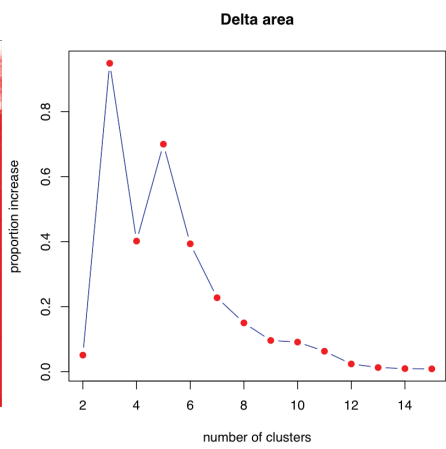

## Online Repository Figure 3

a Cluster 1 downregulated gene set

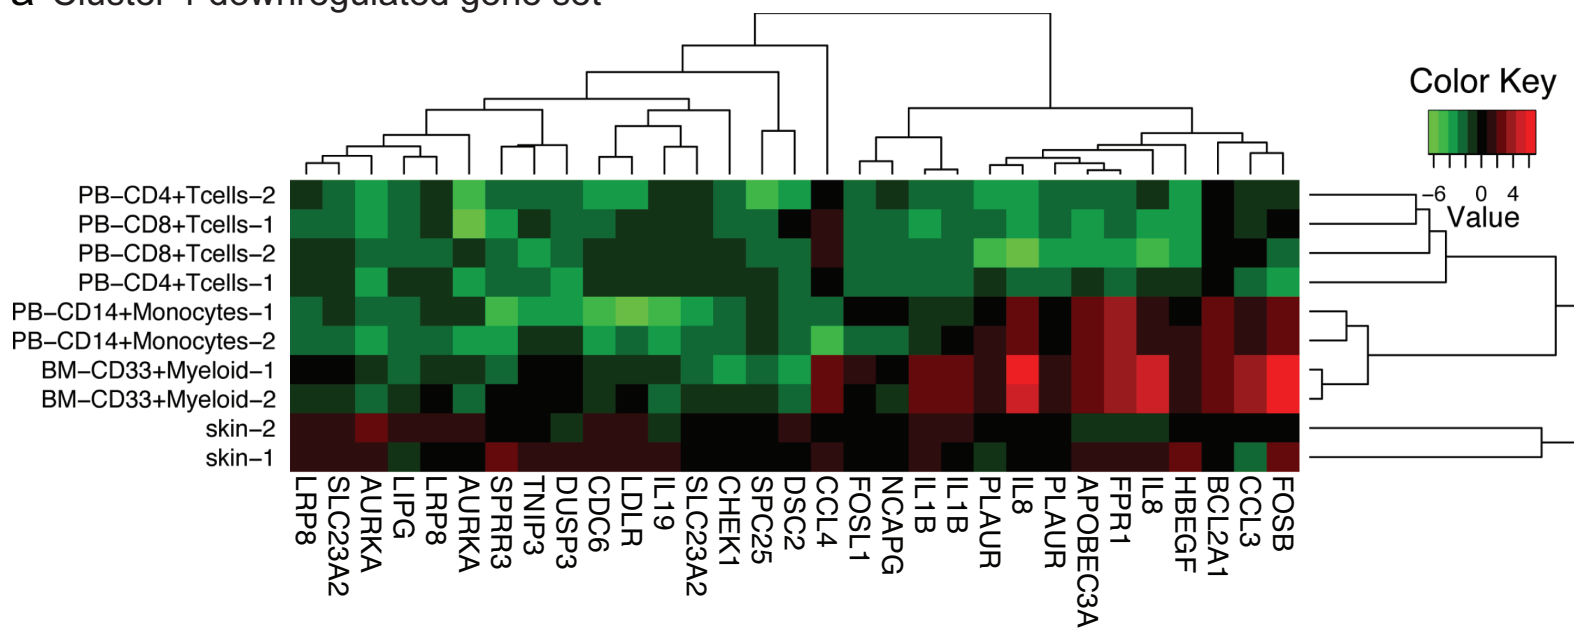

b **HBEGF** and **CD11c**

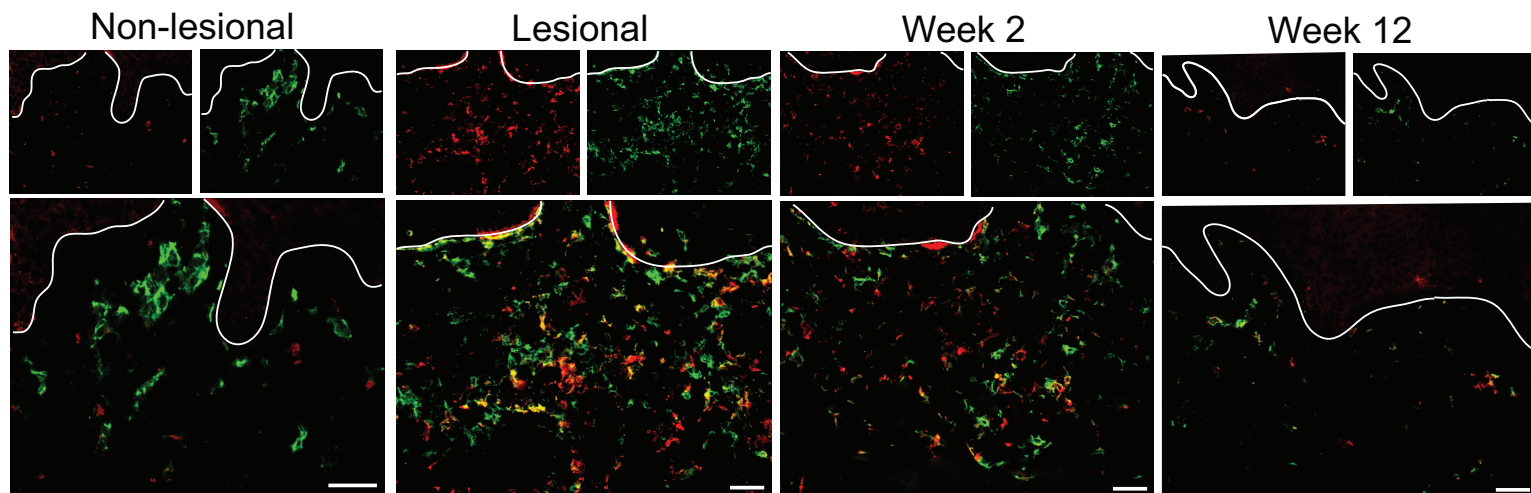

c **CD11c** and **PLAUR**

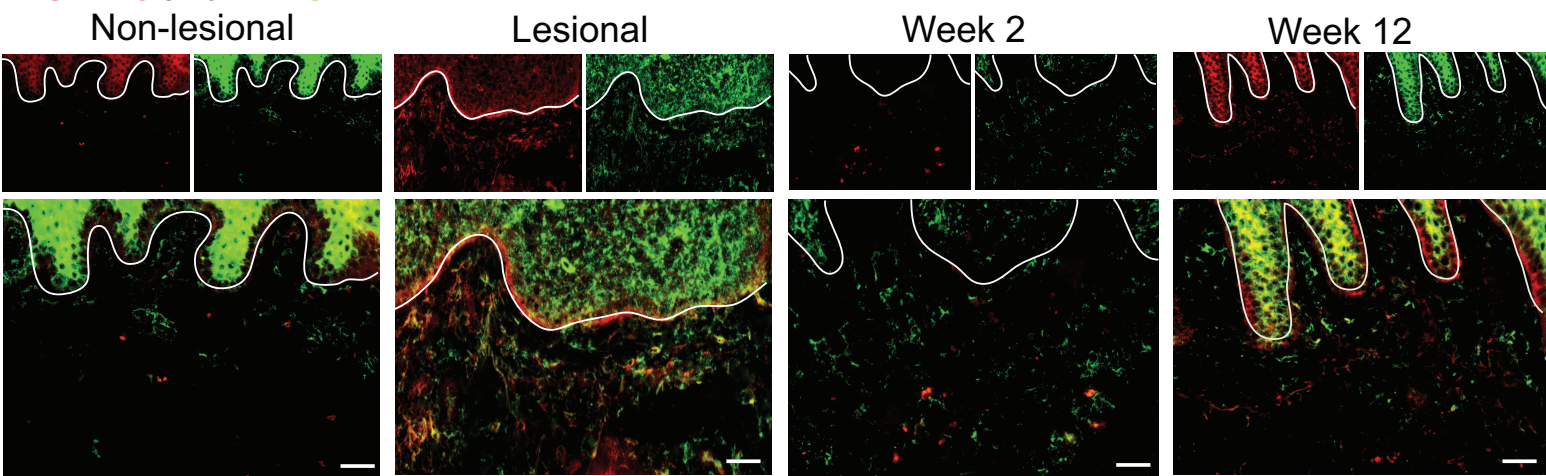

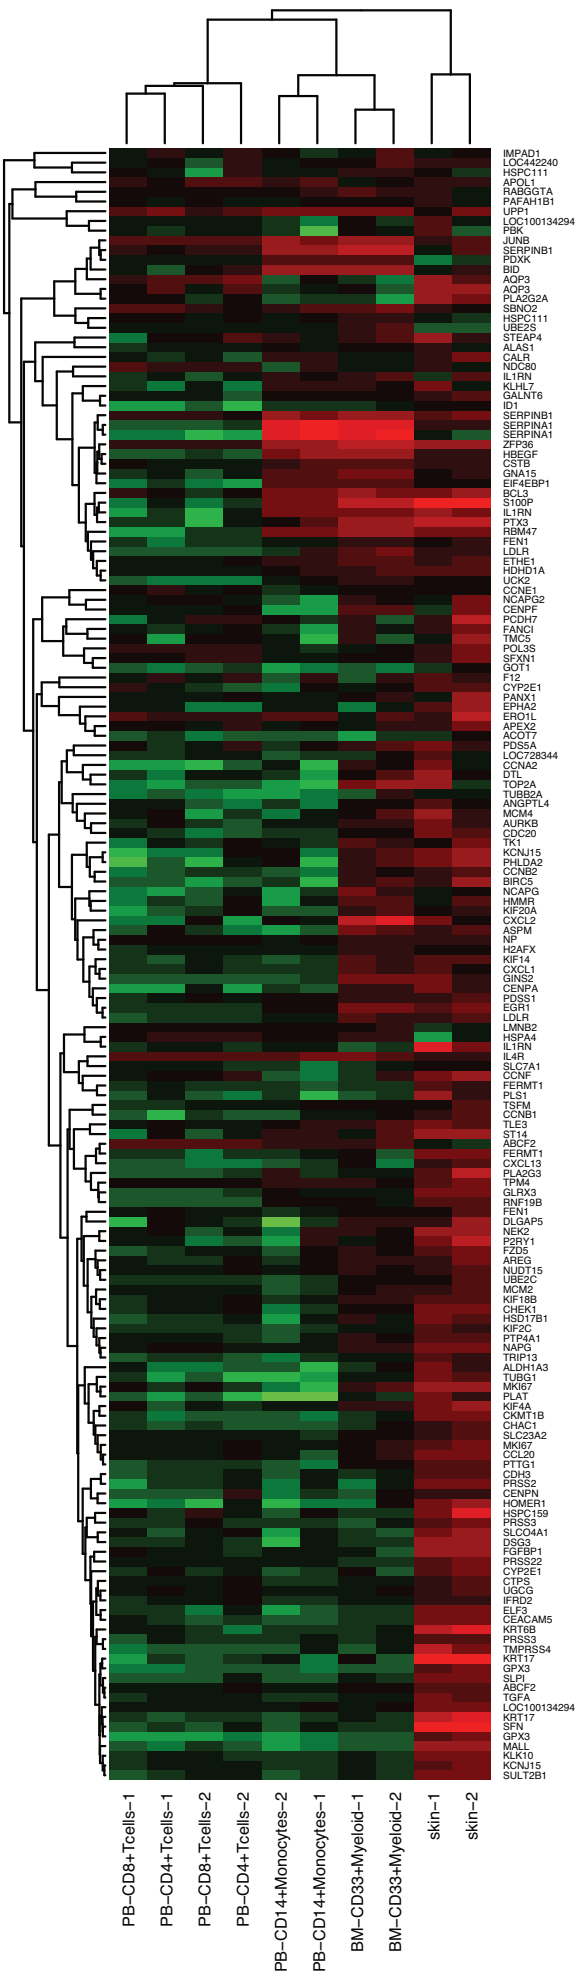

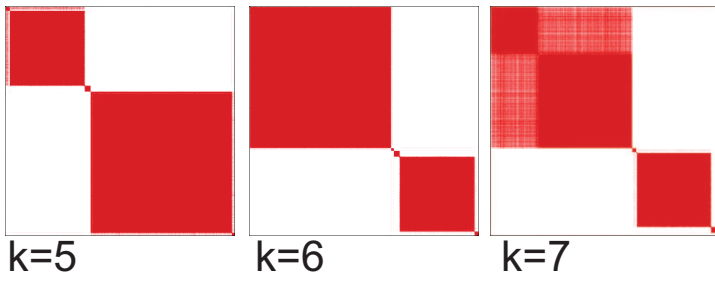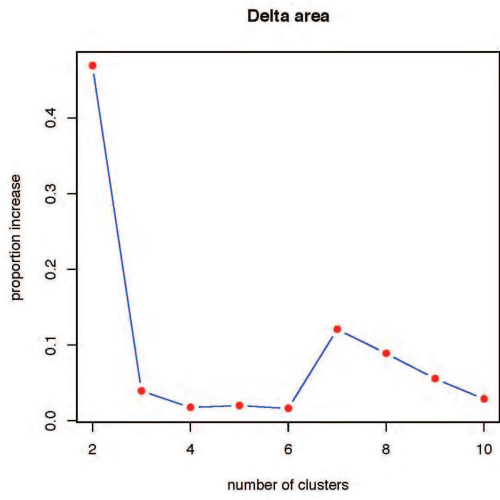

a. Responders

TNF-dependent DC activation

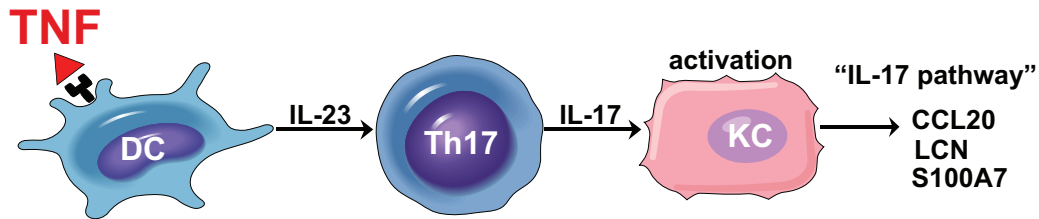

b. Non-responders

TNF-independent DC activation

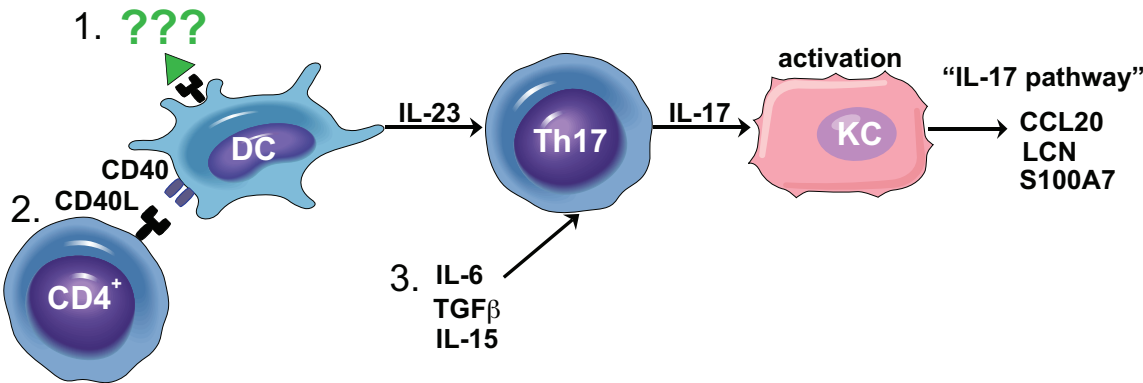

## IL-17 and TNF

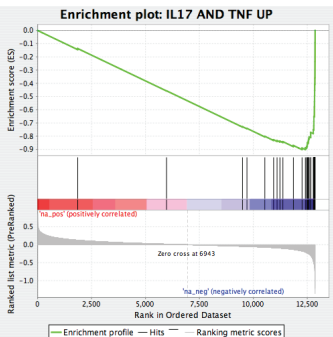

## IL-17 specific

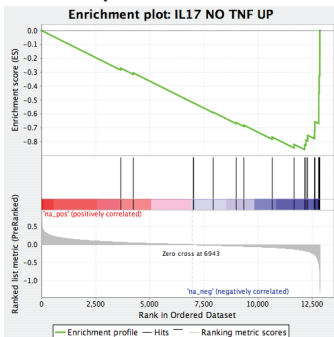

## IFN $\gamma$

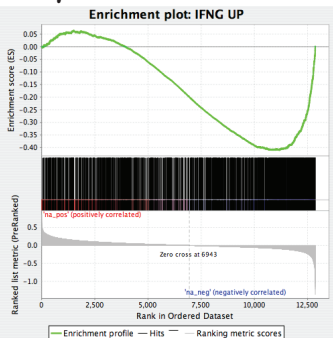

## TNF specific

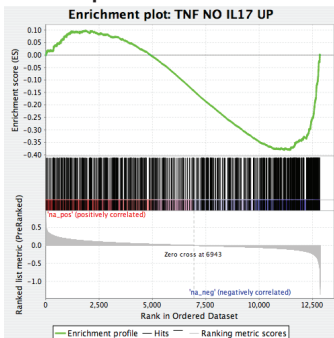

## IL-17 and TNF

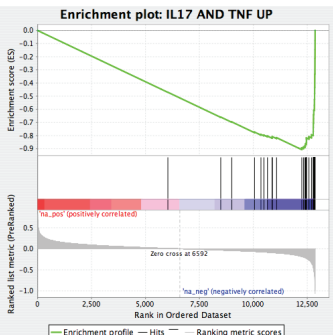

## IL-17 specific

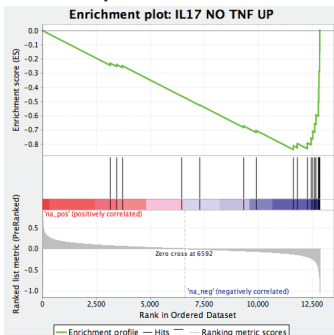

## IFN $\gamma$

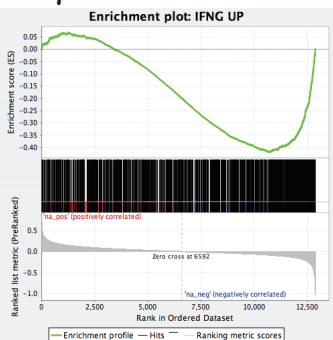

## TNF specific

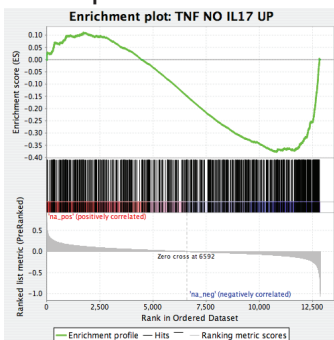

Supplement: NIHMS159422-supplement-01.pdf [file NIHMS159422-supplement-01.pdf]
